# Supplementary material for: Marker-free characterization of full-length transcriptomes of single live circulating tumor cells
Source: HighWire-hosted journal article supplement (doi:10.1101/gr.276600.122), 2022-11-22
Supplement: Supplemental_Table_S3.docx [file Supplemental_Table_S3.docx]

**Supplementary Table S3.** Description of datasets.

| **Study** | **Dataset** | **#WBCs/PBMCs** | **#CTCs** |
| --- | --- | --- | --- |
| **Study #1** | **Velten et al. ( GSE75478 )** [(Velten *et al.*, 2017)](https://paperpile.com/c/LG7NyY/pOxk) | 1035 HSCs and progenitors | 0 |
| **Ting et al. (GSE60407)** [(Ting *et al.*, 2014)](https://paperpile.com/c/LG7NyY/pZmr) | 0 | 7 pancreatic CTCs |
| **Yu et al. (GSE55807)**  [(Yu *et al.*, 2014)](https://paperpile.com/c/LG7NyY/j71I) | 0 | 6 breast CTCs |
| **Sarioglu et al. (GSE67939)**  [(Sarioglu *et al.*, 2015)](https://paperpile.com/c/LG7NyY/YUSh) | 2 WBCs | 15 breast CTCs |
| **Aceto et al. (GSE51827)**  [(Aceto *et al.*, 2014)](https://paperpile.com/c/LG7NyY/e7wF) | 0 | 29 breast CTCs and CTC clusters |
| **Zheng et al. (GSE74639)**  [(Zheng *et al.*, 2017)](https://paperpile.com/c/LG7NyY/AFuE) | 0 | 10 Lung CTCs  6 single cells from Primary Tumor |
| **Jordan et al. (GSE75367)**  [(Jordan *et al.*, 2016)](https://paperpile.com/c/LG7NyY/RQQN) | 0 | 74 breast CTCs |
| **Study #2** | **Ebright et al.** (GSE144494)  [(Ebright *et al.*, 2020)](https://paperpile.com/c/LG7NyY/3Hde) | 0 | 824 breast CTCs |
| **Poonia et al.** (ClearCell® FX PolarisTM) |  | 81 CTCs breast cancer |
| **Ding et al. WBC1** (<https://portals.broadinstitute.org/single_cell>)  [(Ding *et al.*, 2019)](https://paperpile.com/c/LG7NyY/59Sc) | 376 | 0 |
| **Ding et al. WBC2** (<https://portals.broadinstitute.org/single_cell>)  [(Ding *et al.*, 2019)](https://paperpile.com/c/LG7NyY/59Sc) | 376 | 0 |
