# Supplementary material for: Marker-free characterization of full-length transcriptomes of single live circulating tumor cells
Source: HighWire-hosted journal article supplement (doi:10.1101/gr.276600.122), 2022-11-22
Supplement: Supplemental_Table_S4.docx [file Supplemental_Table_S4.docx]

**Supplementary Table S4:** Highly expressed markers in immune cells and epithelial cells.

| **PanglaoDB_markers** | | | **The Human Protein Atlas + Literature** | |
| --- | --- | --- | --- | --- |
| **Epithelial** | **B lymphocyte** | **T lymphocyte** | **Immune genes** | **Breast elevated genes** |
| *SCNN1B* | *CD2* | *CD3D* | *KIR3DL2* | *PRKAR2B* |
| *SCNN1D* | *CD5* | *CD3G* | *P2RY11* | *ALDH3B1* |
| *SCNN1G* | *MS4A1* | *CD3E* | *ECSCR* | *BRCA1* |
| *IFI16* | *CR2* | *HOPX* | *CARD17* | *CDH1* |
| *BOK* | *CD22* | *CCL3* | *TNFSF11* | *FGFR2* |
| *NKD1* | *FCER2* | *CCL4* | *HAVCR2* | *ACACB* |
| *FZD6* | *CD40* | *GIMAP2* | *CTSV* | *SRPX2* |
| *DKK3* | *CD69* | *SYT3* | *DNA2* | *GATA3* |
| *NRP2* | *CD70* | *NOTCH3* | *XCL1* | *MMD* |
| *KAP* | *CD79A* | *SEMA6D* | *XCL2* | *KRT18* |
| *SFRP5* | *CD79B* | *DKK3* | *KLRF1* | *NANOG* |
| *RAI14* | *CD80* | *IFIT3* | *GJD3* | *ALDH5A1* |
| *DEFB1* | *CD86* | *CERK* | *ERCC6L* | *GHR* |
| *KLK1* | *TNFRSF9* | *CCL6* | *EMID1* | *MLPH* |
| *AGR2* | *SDC1* | *PMCH* | *KIR2DL4* | *SDC1* |
| *APOA1* | *TNFSF4* | *CD4* | *SPTSSB* | *ALDH8A1* |
| *GPA33* | *TNFRSF13B* | *LTB* | *FAM212B* | *EPCAM* |
| *ANPEP* | *TNFRSF13C* | *GIMAP3* | *SPRED2* | *F2RL3* |
| *APN* | *PDCD1* | *CXCR6* | *SH2D1B* | *PDE11A* |
| *CRYBA1* | *IGHD* | *IL7R* | *DLL1* | *ELF5* |
| *BMI1* | *IGHM* | *SATB1* | *KLRC3* | *SLC19A3* |
| *BRCA1* | *RASGRP3* | *LEF1* | *STAB1* | *ALDH1L2* |
| *MUC16* | *HLA-DRA* | *ITK* | *VCAN* | *DRAM1* |
| *CEACAM5* | *LTB* | *TRBC2* | *SIGLEC1* | *BRIP1* |
| *CTSE* | *HLA-DQA1* | *PTPRCAP* | *LGALS2* | *ALDH1B1* |
| *SCGB1A1* | *FLI1* | *GEM* | *GZMB* | *ERBB2* |
| *DESMIN* | *CD14* | *CD7* | *MYBL2* | *KLK3* |
| *EXO1* | *SEMA6D* | *MAFF* | *ASIP* | *FRMD1* |
| *FOXA1* | *LAIR1* | *TGIF1* | *PHEX* | *AFAP1L1* |
| *GABRP* | *IFIT3* | *RORA* | *SMPD3* | *AZGP1* |
| *GGT1* | *IGLL1* | *TNFAIP3* | *MAN2B1* | *CD300LG* |
| *SFN* | *DNTT* | *CREM* | *CD33* | *ALDH7A1* |
| *KRT13* | *MME* | *PXDC1* | *CPVL* | *CLEC3A* |
| *LTF* | *SPN* | *NABP1* | *SUSD1* | *KRT8* |
| *SLC46A2* | *CD19* | *FAM110A* | *KPTN* | *KRT15* |
| *MEP1* | *CD24* | *EEF1B2P3* | *C1orf54* | *NLRP8* |
| *MEP7* | *CD27* | *TRAC* | *GPR31* | *ADIPOQ* |
| *NES1* | *B3GAT1* | *CD69* | *DPPA4* | *SHOX* |
| *KLK10* | *CD72* | *PFN1P1* | *FLT3* | *AGRN* |
| *P2RX7* | *MUM1* | *IL32* | *BATF3* | *FSIP2* |
| *CDKN2A* | *PAX5* | *CXCR4* | *KCNK17* | *APOD* |
| *TP63* | *JCHAIN* | *H2-Q7* | *IGFLR1* | *CLDN4* |
| *CDH3* | *MZB1* | *TRBC1* | *CD68* | *HCAR1* |
| *PPN1* | *LY6D* | *SEPT1* | *CLEC10A* | *PIWIL2* |
| *PSCA* | *H2-DMB2* | *BCL2* | *ITM2C* | *SLC44A4* |
| *AGER* | *FCMR* | *CYTL1* | *NR5A1* | *AKR1B15* |
| *ZFP42* | *BANK1* | *CD2* | *DIAPH3* |  |
| *SPRR1B* | *EDEM1* | *CTSW* | *IRF8* |  |
| *SI* | *VPREB3* | *PTPN22* | *ARL5C* |  |
| *TTR* | *H2-OB* | *TXK* | *ZP1* |  |
| *TM4SF20* | *POU2AF1* | *GDPD3* | *C12orf45* |  |
| *TSTD1* | *CRELD2* | *TRAF1* | *CCDC50* |  |
| *SYCN* | *DERL3* | *IL2RA* | *CD1D* |  |
| *HBEGF* | *SIGLECG* | *CD8B* | *CD1B* |  |
| *PIGR* | *RALGPS2* | *BATF3* | *CD1E* |  |
| *PRSS32* | *FCHSD2* | *GZMH* | *OR3A3* |  |
| *MUC13* | *POLD4* | *LAG3* | *TLCD1* |  |
| *SELENBP1* | *CMAH* | *CD8B1* | *DNASE1L3* |  |
| *ELF3* | *TNFRSF17* | *GZMK* | *E2F7* |  |
| *MUC3* | *HVCN1* | *GZMB* | *PLD4* |  |
| *OIT1* | *TRP53INP1* | *SH2D1A* | *NLRP7* |  |
| *TSPAN1* | *FCRLA* | *MYO1G* | *CD300C* |  |
| *GUCA2A* | *EDEM2* | *FMNL1* | *SCN9A* |  |
| *PHGR1* | *BLNK* | *S1PR4* | *CLIC3* |  |
| *LYPD8* | *H2-OA* | *CD247* | *CRTAP* |  |
| *LGALS4* | *TXNDC11* | *MS4A4C* | *PTCRA* |  |
| *GATA2* | *BTLA* | *GIMAP5* | *TLR9* |  |
| *SEC23B* | *SMAP2* | *CD28* | *XCR1* |  |
| *TSPAN8* | *SCD1* | *CD160* | *AMIGO3* |  |
| *DLX5* | *FAM46C* | *TCRG-C2* | *CD163* |  |
| *DGAT2* | *FKBP11* | *TCRG-C1* | *RPP25* |  |
| *ITPR2* | *SEC61A1* | *TCRG-C4* | *CLN8* |  |
| *THRSP* | *SPCS3* | *TRDC* | *ADAP2* |  |
| *PLA2G4A* | *SPIB* | *H2-T3* | *IRF7* |  |
| *SLC25A48* | *EAF2* | *H2-T10* | *LILRB4* |  |
| *PGR* | *CXCR4* | *RHOH* | *SIGLEC15* |  |
| *ZFP322A* | *BIRC3* | *KLRB1* | *MPEG1* |  |
| *FERMT1* | *IGLC2* | *CCR2* | *CLEC4C* |  |
| *ZFP704* | *IGLC3* | *IL2RB* | *NAGA* |  |
| *EHF* | *IGLC1* | *CD163L1* | *SMIM5* |  |
| *PLEKHS1* | *IL21R* | *TRDV4* | *CLEC6A* |  |
| *CDKL1* | *IGKC* | *MBD2* | *GPR33* |  |
| *MECOM* | *IGLV1* | *ICOS* | *RFPL4A* |  |
| *MSX1* | *VPREB1* | *IL18R1* | *RFPL4AL1* |  |
| *RNF128* | *VPREB2* | *TNFRSF4* | *LILRA4* |  |
| *ANLN* | *LRMP* | *CCL20* | *TNFRSF6B* |  |
| *CASC5* | *KLHL6* | *CLEC2D* | *ALG1L2* |  |
| *CKAP2* | *SLAMF6* | *CD8A* | *TIFAB* |  |
| *HMMR* | *FAM129C* | *CD6* | *FCN1* |  |
| *KIF15* | *BST1* | *S100A4* | *HMOX1* |  |
| *CKAP2L* | *MSH5* | *CCL5* | *LILRB1* |  |
| *KIF20B* | *DOK3* | *LCK* | *ICAM4* |  |
| *HIRIP3* | *BACH2* | *CD81* | *CCL24* |  |
| *INCENP* | *FCER2A* | *THY1* | *CXCL12* |  |
| *KIF23* | *PXK* | *LAT* | *PKD2L1* |  |
| *PRC1* | *IGHG1* | *SKAP1* | *SLC46A2* |  |
| *ECT2* | *IGHG3* | *TCF7* | *TNFRSF8* |  |
| *CXCL10* | *IGHG4* | *CCR7* | *APOBEC3A* |  |
| *CXCL8* | *IGHA* | *MYB* | *TMTC1* |  |
| *CCL20* | *CD38* | *CCL4L2* | *IL10* |  |
| *CXCL17* | *PTPRC* | *PYHIN1* | *CYP1B1* |  |
| *PRG4* | *EBF1* | *GZMA* | *NAAA* |  |
| *ALOX15* | *BCL11A* | *JUNB* | *CXCL9* |  |
| *F5* | *CCR7* | *DUSP2* | *SLIT2* |  |
| *EMILIN2* | *CD55* | *IFNG* | *C1QC* |  |
| *SAA3* | *CD74* | *CD52* | *SPIC* |  |
| *SPRR2A1* | *CD52* | *BRAF* | *MS4A7* |  |
| *SPTSSB* | *TLR9* |  | *MS4A14* |  |
| *FMO5* | *SWAP70* |  | *SERPINA9* |  |
| *IVL* | *HMGA1* |  | *C1QB* |  |
| *VSIG2* |  |  | *C1QA* |  |
| *AQP3* |  |  | *GPBAR1* |  |
| *PAQR5* |  |  | *CSF1R* |  |
| *EPCAM* |  |  | *VMO1* |  |
| *CLDN1* |  |  | *CD300E* |  |
| *OCLN* |  |  | *CD59* |  |
| *MUC5AC* |  |  | *PTPRC* |  |
