# Supplementary material for: Marker-free characterization of full-length transcriptomes of single live circulating tumor cells
Source: HighWire-hosted journal article supplement (doi:10.1101/gr.276600.122), 2022-11-22
Supplement: Supplemental_Table_S5.docx [file Supplemental_Table_S5.docx]

**Supplementary Table S5:** Cluster wise differentially upregulated genes.

| **Custer_0** | **Custer_1** | **Custer_2** | **Custer_3** |
| --- | --- | --- | --- |
| *MTRNR2L8* | *ACRBP* | *ING5* | *HBB* |
| *TMSB4X* | *TUBB1* | *HBB* | *KRT18* |
| *RPS28* | *CLEC1B* | *MAP1LC3C* | *AGR2* |
| *RPL13* | *SELP* | *EXD1* | *RPA3* |
| *CD52* | *PPBP* | *SLC36A2* | *KRT19* |
| *RPS9* | *TSC22D1* | *ITGA2B* | *TSR3* |
| *MTRNR2L1* | *SPARC* | *FBLIM1* | *CLTB* |
| *CORO1A* | *RUFY1* | *SP100* | *ELF3* |
| *RPS18* | *ITGA2B* | *VSTM4* | *MLPH* |
| *RPS15* | *MPP1* | *ZFP30* | *TUBB6* |
| *RPL28* | *PF4* | *ITIH5* | *DHRS4* |
| *RPL3* | *ALOX12* | *LMOD3* | *GRHPR* |
| *RPL19* | *TMEM40* | *GATAD1* | *DHRS4L2* |
| *ITGB2* | *HBB* | *AS3MT* | *FXYD3* |
| *RPS17* | *GSTO1* | *COX6B2* | *VPS51* |
| *RPL9* | *C2orf88* | *C1orf229* | *MGP* |
| *RPL10A* | *RGS10* | *QPCTL* | *GPKOW* |
| *RPL23A* | *PDLIM1* | *HSD17B13* | *XBP1* |
| *RPL17* | *VCL* | *ZNF677* | *MUC1* |
| *RPS23* | *TSPAN33* | *GPR82* | *HSPB1* |
| *MALAT1* | *NFE2* | *MTFMT* | *GRINA* |
| *RPS29* | *DAB2* | *IDO1* | *TACSTD2* |
| *RPL26* | *XPNPEP1* | *METTL2B* | *BAIAP2* |
| *RPLP2* | *TMEM140* | *LYRM4* | *EIF3C* |
| *RAC2* | *ODC1* | *TMEM213* | *MYOF* |
| *RPS26* | *ITGB5* | *MED18* | *HSP90AB1* |
| *RPS27* | *GNG11* | *FCAR* | *RPS2* |
| *MTRNR2L6* | *TUBA4A* | *TAF8* | *EPCAM* |
| *EEF1A1* | *TREML1* | *C12orf65* | *BANF1* |
| *RPS3A* | *PTGS1* | *NMNAT1* | *PRDX2* |
| *CD53* | *ESAM* | *APOBEC3A* | *AZGP1* |
| *RPS16* | *ABCC3* | *AP1S3* | *KPNA2* |
| *RPL18A* | *SMOX* | *ZNF250* | *HSP90AA1* |
| *LSP1* | *NRGN* | *GDPD1* | *BLVRB* |
| *RPS25* | *CLU* | *AKIP1* | *S100A14* |
| *RPL18* | *RGS18* | *MOG* | *CCT3* |
| *RPL6* | *GFI1B* | *CXorf56* | *DYNLL1* |
| *RPL29* | *TAL1* | *DAND5* | *DDR1* |
| *RPL5* | *TLN1* | *NEK2* | *TRIM28* |
| *RPS3* | *MMD* | *BPNT1* | *CD81* |
| *HNRNPA1* | *ICAM2* | *ENTPD4* | *S100P* |
| *RPS14* | *GRAP2* | *APOL1* | *PHB* |
| *RPS5* | *CDKN2D* | *PSTPIP2* | *KRT8* |
| *CXCR4* | *RDH11* | *AIPL1* | *PEBP1* |
| *RPL32* | *PLEKHO1* | *PECR* | *RAB24* |
| *RPL34* | *CDKN1A* | *ENTPD1* | *NME1* |
| *RPS4X* | *RAB11A* | *TRMT10B* | *JTB* |
| *RPS13* | *CTSA* | *ZBTB3* | *CAPNS1* |
| *RPL13A* | *RAB32* | *HCAR1* | *NDUFB9* |
| *RPS6* | *CTDSPL* | *VSIG1* | *HDGF* |
| *RPL7* | *ETFA* | *ZNF483* | *IFI27* |
| *RPS15A* | *PRKAR2B* | *ZNF554* | *S100A11* |
| *RPL10* | *GPX1* | *GINS4* | *CYC1* |
| *RPS19* | *ENDOD1* | *TRAF3IP2* | *SOD1* |
| *RPL7A* | *VSIG2* | *SHROOM4* | *PPA1* |
| *RPL11* | *MFSD1* | *CC2D2A* | *FDPS* |
| *RPL39* | *PTCRA* | *MANEAL* | *PSMB7* |
| *IL2RG* | *LIMS1* | *C15orf40* | *SPINT2* |
| *RPL31* | *ZNF185* | *ZFP42* | *RPF1* |
| *RPSA* | *TPM4* | *GREB1* | *DSTN* |
| *RPL8* | *MEPCE* | *SKA1* | *RPLP0* |
| *RPL14* | *MAX* | *LNX2* | *ANXA2* |
| *RPL37A* | *LGALSL* | *CHRNB1* | *BAG6* |
| *CD48* | *GP6* | *NFKBIB* | *PSMA4* |
| *RPL21* | *F13A1* | *INIP* | *TXN* |
| *RPL30* | *TPST2* | *SEC14L4* | *HDLBP* |
| *LCP1* | *MYLK* | *TRPV1* | *ATP6V0C* |
| *RPS10* | *THBS1* | *VPS33A* | *HSPD1* |
| *EEF1G* | *TSPAN18* | *SCD5* | *RNF187* |
| *RPS7* | *CTTN* | *LRRN4CL* | *TPI1* |
| *PTPRC* | *NEXN* | *THAP6* | *PSMB4* |
| *LAPTM5* | *GAS2L1* | *SLC12A8* | *SNRPE* |
| *HNRNPH1* | *TIMP1* | *CYP1A2* | *RAB25* |
| *EEF1D* | *BIN2* | *PDLIM5* | *ALAS2* |
| *VIM* | *BCL2L1* | *ASTN2* | *PSMD4* |
| *FAU* | *PGRMC1* | *ZNF527* | *DCTPP1* |
| *S100A4* | *P2RX1* | *CCL22* | *UQCRQ* |
| *RPLP1* | *NCOA4* | *SPTLC1* | *HSPA8* |
| *PTPRCAP* | *EHD3* | *ZBTB8A* | *TSPAN13* |
| *TXNIP* | *LAT* | *DYDC1* | *STMN1* |
| *IFITM1* | *RAP1B* | *ABCB5* | *CDK4* |
| *SLC25A6* | *LTBP1* | *ZNF620* | *HBD* |
| *CALM1* | *PTPN18* | *ADRA1A* | *MDK* |
| *RPL27* | *ILK* | *FAM74A1* | *EIF6* |
| *C6orf62* | *PEAR1* | *SHOX* | *SPINT1* |
| *RPL36A* | *TUBA8* | *PLCXD1* | *KRT7* |
| *RPL36* | *FAM110A* | *SLC28A2* | *LDHA* |
| *CD37* | *TALDO1* | *BRIP1* | *CD63* |
| *IL32* | *UBL4A* | *MAB21L3* | *TUBB4B* |
| *RPS12* | *SLC2A3* | *ZNF850* | *PLIN3* |
| *CD74* | *RAB31* | *SEMA3E* | *RAN* |
| *RPL12* | *LAMTOR1* | *ARGFX* | *PSMB2* |
| *RPS21* | *VDAC3* | *CRX* | *CHCHD2* |
| *NPM1* | *DIAPH1* | *CYP4V2* | *PSMB5* |
| *EEF1B2* | *EIF2AK1* | *WDR92* | *SELENBP1* |
| *IFITM2* | *SNCA* | *PCBD2* | *NQO1* |
| *RPS11* | *TUBA1C* | *TNFAIP8L1* | *LGALS3BP* |
| *RPL35* | *GMPR* | *RHD* | *TYMS* |
| *RPS24* | *DNM3* | *CABP4* | *BSCL2* |
| *RPS8* | *MFAP3L* | *TBXA2R* | *AP2M1* |
| *SRSF5* | *PLA2G12A* | *DGKB* | *SLC1A5* |
| *RPL41* | *MEIS1* | *NRIP3* | *PRDX1* |
| *NKG7* | *GNAQ* | *CYP51A1* | *CCT2* |
| *NACA* | *TTC7B* | *MOCS3* | *NDUFS2* |
| *HCLS1* | *LGALS12* | *PPARD* | *COX6C* |
| *RPL27A* | *PDLIM7* | *ZNF669* | *HBA2* |
| *DAZAP2* | *GLA* | *SLC14A2* | *BLVRA* |
| *RPLP0* | *ZYX* | *MEFV* | *PSMC5* |
| *PABPC1* | *PDZK1IP1* | *RAB42* | *TFF1* |
| *MTRNR2L10* | *PCSK6* | *CCBE1* | *AMZ2* |
| *ANXA1* | *CNST* | *QPRT* | *TMEM205* |
| *PCSK5* | *MKRN1* | *SLC31A1* | *HSPA1A* |
| *RPL38* | *STOM* | *TOR1AIP2* | *CCT5* |
| *RPL35A* | *THOC2* | *PRR11* | *REPIN1* |
| *RPS27A* | *PTTG1IP* | *AP4S1* | *PDCD6* |
| *RPL37* | *PTP4A2* | *LRRC2* | *DUS1L* |
| *RPL24* | *WRNIP1* | *LRRC27* | *ERGIC3* |
| *TMSB10* | *RAB27B* | *MILR1* | *SLC25A3* |
| *EVI2B* | *SAT1* | *C21orf62* | *C19orf53* |
| *RPL23* | *ITGB3* | *ATCAY* | *CDK5RAP3* |
| *RBM3* | *GNAZ* | *ZNF490* | *PTMS* |
| *PFDN5* | *GATA1* | *PGAM5* | *DYNLRB1* |
| *MORC4* | *CPNE5* | *TSTD3* | *PSME2* |
| *SELPLG* | *CCND3* | *ASB11* | *NADK* |
| *ZFP36L1* | *PNP* | *HTRA4* | *RPL7* |
| *NCL* | *GP1BA* | *CCDC142* | *TCEAL4* |
| *RPL4* | *PTPN12* | *SULT2A1* | *XRCC5* |
| *TRAF3IP3* | *TACC3* | *CPM* | *CRABP2* |
| *ASB3* | *NAP1L1* | *SLC50A1* | *BTF3* |
| *DDX5* | *C1orf198* | *CDH23* | *UTP14A* |
| *LIMD2* | *MGLL* | *C1orf210* | *MDH2* |
| *PPIA* | *TJP2* | *ZNF835* | *LRRC59* |
| *ZAP70* | *GRK5* | *EXPH5* | *ECHS1* |
| *CDC42* | *IFRD1* | *CCDC170* | *MRPL51* |
| *ARHGAP15* | *GPX4* | *TBCCD1* | *PSMD1* |
| *RPS20* | *INSIG1* | *PIWIL2* | *NOP56* |
| *CST7* | *SAV1* | *EPHA10* | *PRDX4* |
| *SELL* | *R3HDM4* | *TMEM19* | *SEPHS2* |
| *RPL15* | *GNAS* | *FADS6* | *EFNA1* |
| *LITAF* | *PLEK* | *SBSPON* | *MRPS26* |
| *TOMM7* | *CALM3* | *ZNF793* | *PSMA7* |
| *HNRNPC* | *PDE5A* | *OPA3* | *SNRPC* |
| *PPP2R5C* | *TMEM164* | *KCNA7* | *TSPAN1* |
| *PFN1* | *CD9* | *RNF170* | *ILF2* |
| *TPT1* | *FERMT3* | *FBXO27* | *SNF8* |
| *PLAC8* | *SIAH2* | *GGT6* | *SLC25A5* |
| *CNBP* | *PNKD* | *ZNF526* | *PRSS8* |
| *HNRNPK* | *DIMT1* | *LRTOMT* | *MRFAP1* |
| *AHNAK* | *STK24* | *ZNF430* | *AGR3* |
| *GNG2* | *CLCN3* | *HSCB* | *SPDEF* |
| *RPL22* | *AMD1* | *L2HGDH* | *TOP2A* |
| *EML4* | *SUSD1* | *SUV39H2* | *SNRNP25* |
| *TRIM22* | *UBE2E3* | *SLC9A7* | *NHP2* |
| *S1PR1* | *PDK1* | *CD82* | *PPP1R14B* |
| *PRF1* | *ATF4* | *METTL21A* | *PCBP1* |
| *CD3D* | *UBE2F* | *PDE6A* | *PSMD8* |
| *ZFP36* | *WDR1* | *NLRP12* | *TUFM* |
| *COX4I1* | *SYTL4* | *SAA2* | *TCP1* |
| *TNFAIP3* | *KCTD10* | *HIF3A* | *SLC9A3R1* |
| *ARHGDIB* | *CMIP* | *TMEM130* | *RAC1* |
| *BTF3* | *TNFSF4* | *MBOAT1* | *GLO1* |
| *SUMO2* | *ABHD4* | *FBXO6* | *S100A16* |
| *PTMA* | *ITM2B* | *TATDN3* | *AIDA* |
| *STAT4* | *SLA2* | *ADIPOQ* | *FBL* |
| *TRA2A* | *SERPINB1* | *SLC35E3* | *PSMC3* |
| *CD44* | *KIF2A* | *AGMAT* | *SMAP1* |
| *CNN2* | *EMC3* | *POU5F1* | *RAB13* |
| *DUSP1* | *MICU1* | *AFMID* | *RPSA* |
| *CFL1* | *PPM1A* | *KCNJ3* | *COX6A1* |
| *IL10RA* | *PKM* | *BHMT2* | *CLTC* |
| *TMEM45A* | *TRIM58* | *RBPMS2* | *CHMP2A* |
| *INPP5D* | *SNN* | *SLC52A1* | *HSD17B10* |
| *HSPA8* | *CD63* | *DMC1* | *ZG16B* |
| *LCK* | *ANTXR2* | *PBOV1* | *SLC25A39* |
| *CYTIP* | *PARD3* | *ZNF506* | *BSG* |
| *ANKRD44* | *FYN* | *FBXL13* | *AHCY* |
| *HCST* | *PRKCB* | *ARSK* | *SEC16A* |
| *SMG1* | *BNIP3L* | *FUT1* | *TUBB* |
| *CAPZA1* | *PDCD10* | *STAC2* | *PPDPF* |
| *STK17B* | *MMRN1* | *NUP43* | *DBI* |
| *GIMAP4* | *BMP6* | *OLAH* | *RPL8* |
| *EIF3F* | *PIP4K2A* | *IL10* | *EPHX1* |
| *S100A10* | *CCNG1* | *ACBD7* | *TRIB1* |
| *GIMAP7* | *CHD1L* | *WNT7B* | *CFB* |
| *ARPC3* | *CMTM5* | *PGM5P2* | *TAF9* |
| *TBC1D10C* | *CD99* | *SIX4* | *SERPINA3* |
| *SASH3* | *RNF11* | *SNHG7* | *ESRP1* |
| *CDC42SE1* | *PRDX6* | *TMEM105* | *CTNNA1* |
| *DDX6* | *RAB37* | *SLC25A15* | *SRM* |
| *UBA52* | *RGS6* | *FAM161A* | *BST2* |
| *EIF2S3* | *PITPNM2* | *ZSCAN2* | *WDR34* |
| *FOS* | *TBPL1* | *BCL2L15* | *FKBP4* |
| *GZMA* | *CENPT* | *METTL6* | *SMARCA4* |
| *PSAP* | *CCDC92* | *TNFAIP8L3* | *CA12* |
| *UCP2* | *TAX1BP3* | *KREMEN1* | *VDAC2* |
| *FTL* | *RSU1* | *B3GALNT2* | *NDUFA4* |
| *EZR* | *SEC14L1* | *C8orf86* | *GATA3* |
| *TAPBP* | *DAPP1* | *ZNF865* | *ANXA11* |
| *HMGN2* | *SQSTM1* | *SLC7A14* | *ERBB3* |
| *FLNA* | *SPOCD1* | *PTCHD4* | *RPL12* |
