# Supplementary material for: Marker-free characterization of full-length transcriptomes of single live circulating tumor cells
Source: HighWire-hosted journal article supplement (doi:10.1101/gr.276600.122), 2022-11-22
Supplement: Supplemental_Table_S6.docx [file Supplemental_Table_S6.docx]

**Supplementary Table S6:** Clusterwise differentially enriched pathways

| **Cluster_0** | **Cluster_1** | **Cluster_2** | **Cluster_3** |
| --- | --- | --- | --- |
| WP_CYTOPLASMIC_RIBOSOMAL_PROTEINS | RAGHAVACHARI_PLATELET_SPECIFIC_GENES | NIKOLSKY_BREAST_CANCER_19Q13.1_AMPLICON | FU_INTERACT_WITH_ALKBH8 |
| KEGG_RIBOSOME | GNATENKO_PLATELET_SIGNATURE | REACTOME_TP53_REGULATES_TRANSCRIPTION_OF_CASPASE_ACTIVATORS_AND_CASPASES | FARMER_BREAST_CANCER_CLUSTER_6 |
| REACTOME_EUKARYOTIC_TRANSLATION_ELONGATION | REACTOME_PLATELET_ADHESION_TO_EXPOSED_COLLAGEN | REACTOME_ERBB2_ACTIVATES_PTK6_SIGNALING | REACTOME_FOLDING_OF_ACTIN_BY_CCT_TRIC |
| REACTOME_RESPONSE_OF_EIF2AK4_GCN2_TO_AMINO_ACID_DEFICIENCY | TONKS_TARGETS_OF_RUNX1_RUNX1T1_FUSION_ERYTHROCYTE_DN | TAKAYAMA_BOUND_BY_AR | KEGG_PROTEASOME |
| BILANGES_SERUM_AND_RAPAMYCIN_SENSITIVE_GENES | HAHTOLA_MYCOSIS_FUNGOIDES_UP | SPIRA_SMOKERS_LUNG_CANCER_DN | BIOCARTA_PROTEASOME_PATHWAY |
| REACTOME_SELENOAMINO_ACID_METABOLISM | BIOCARTA_SPPA_PATHWAY | REACTOME_SYNTHESIS_OF_BILE_ACIDS_AND_BILE_SALTS_VIA_24_HYDROXYCHOLESTEROL | REACTOME_AUF1_HNRNP_D0_BINDS_AND_DESTABILIZES_MRNA |
| REACTOME_SRP_DEPENDENT_COTRANSLATIONAL_PROTEIN_TARGETING_TO_MEMBRANE | BIOCARTA_AGPCR_PATHWAY | ZHENG_FOXP3_TARGETS_IN_THYMUS_DN | WP_MITOCHONDRIAL_CIII_ASSEMBLY |
| REACTOME_NONSENSE_MEDIATED_DECAY_NMD_ | YAMANAKA_GLIOBLASTOMA_SURVIVAL_UP | WP_EICOSANOID_METABOLISM_VIA_CYCLO_OXYGENASES_COX | SHIPP_DLBCL_VS_FOLLICULAR_LYMPHOMA_UP |
| REACTOME_EUKARYOTIC_TRANSLATION_INITIATION | CHUNG_BLISTER_CYTOTOXICITY_DN | REACTOME_THE_ACTIVATION_OF_ARYLSULFATASES | CREIGHTON_AKT1_SIGNALING_VIA_MTOR_DN |
| CHNG_MULTIPLE_MYELOMA_HYPERPLOID_UP | VALK_AML_CLUSTER_7 | REACTOME_LYSINE_CATABOLISM | REACTOME_CROSS_PRESENTATION_OF_SOLUBLE_EXOGENOUS_ANTIGENS_ENDOSOMES_ |
| HOLLEMAN_VINCRISTINE_RESISTANCE_ALL_DN | WIERENGA_STAT5A_TARGETS_DN | HOFMANN_MYELODYSPLASTIC_SYNDROM_HIGH_RISK_DN | REACTOME_DEGRADATION_OF_DVL |
| TIEN_INTESTINE_PROBIOTICS_6HR_UP | REACTOME_P130CAS_LINKAGE_TO_MAPK_SIGNALING_FOR_INTEGRINS | WP_DRUG_INDUCTION_OF_BILE_ACID_PATHWAY | REACTOME_DEFECTIVE_CFTR_CAUSES_CYSTIC_FIBROSIS |
| BILANGES_SERUM_RESPONSE_TRANSLATION | BIOCARTA_GATA3_PATHWAY | KANG_AR_TARGETS_UP | CAFFAREL_RESPONSE_TO_THC_8HR_3_DN |
| REACTOME_ACTIVATION_OF_THE_MRNA_UPON_BINDING_OF_THE_CAP_BINDING_COMPLEX_AND_EIFS_AND_SUBSEQUENT_BINDING_TO_43S | REACTOME_DEFECTS_OF_CONTACT_ACTIVATION_SYSTEM_CAS_AND_KALLIKREIN_KININ_SYSTEM_KKS_ | KORKOLA_EMBRYONAL_CARCINOMA_DN | REACTOME_SCF_SKP2_MEDIATED_DEGRADATION_OF_P27_P21 |
| REACTOME_PROTEIN_METHYLATION | ROSS_AML_OF_FAB_M7_TYPE | REACTOME_PI3K_EVENTS_IN_ERBB2_SIGNALING | WP_PROTEASOME_DEGRADATION |
| IIZUKA_LIVER_CANCER_EARLY_RECURRENCE | BIOCARTA_EDG1_PATHWAY | JEON_SMAD6_TARGETS_DN | RHODES_CANCER_META_SIGNATURE |
| BIOCARTA_THELPER_PATHWAY | BIOCARTA_INTEGRIN_PATHWAY | TURASHVILI_BREAST_NORMAL_DUCTAL_VS_LOBULAR_UP | REACTOME_NEGATIVE_REGULATION_OF_NOTCH4_SIGNALING |
| BIOCARTA_TCYTOTOXIC_PATHWAY | TENEDINI_MEGAKARYOCYTE_MARKERS | ZHENG_IL22_SIGNALING_DN | REACTOME_METABOLISM_OF_POLYAMINES |
| REACTOME_INFLUENZA_INFECTION | BIOCARTA_UCALPAIN_PATHWAY | LIU_TARGETS_OF_VMYB_VS_CMYB_UP | REACTOME_DEGRADATION_OF_AXIN |
| BIOCARTA_CTL_PATHWAY | REACTOME_GRB2_SOS_PROVIDES_LINKAGE_TO_MAPK_SIGNALING_FOR_INTEGRINS_ | WATANABE_COLON_CANCER_MSI_VS_MSS_DN | WP_COMPUTATIONAL_MODEL_OF_AEROBIC_GLYCOLYSIS |
| HOLLEMAN_ASPARAGINASE_RESISTANCE_B_ALL_UP | PID_THROMBIN_PAR4_PATHWAY | REACTOME_TRANSCRIPTIONAL_REGULATION_OF_PLURIPOTENT_STEM_CELLS | REACTOME_THE_ROLE_OF_GTSE1_IN_G2_M_PROGRESSION_AFTER_G2_CHECKPOINT |
| REACTOME_REGULATION_OF_EXPRESSION_OF_SLITS_AND_ROBOS | VALK_AML_CLUSTER_8 | MATZUK_EARLY_ANTRAL_FOLLICLE | REACTOME_HEDGEHOG_LIGAND_BIOGENESIS |
| WHITESIDE_CISPLATIN_RESISTANCE_DN | GOLUB_ALL_VS_AML_DN | FLORIO_HUMAN_NEOCORTEX | MINGUEZ_LIVER_CANCER_VASCULAR_INVASION_UP |
| GOERING_BLOOD_HDL_CHOLESTEROL_QTL_CIS | WP_SEROTONIN_TRANSPORTER_ACTIVITY | REACTOME_BICARBONATE_TRANSPORTERS | REACTOME_DECTIN_1_MEDIATED_NONCANONICAL_NF_KB_SIGNALING |
| HEDENFALK_BREAST_CANCER_BRACX_UP | PID_TCR_JNK_PATHWAY | TERAO_AOX4_TARGETS_SKIN_DN | REACTOME_DEGRADATION_OF_GLI1_BY_THE_PROTEASOME |
| DIRMEIER_LMP1_RESPONSE_LATE_DN | WP_MFAP5_EFFECT_ON_PERMEABILITY_AND_MOTILITY_OF_ENDOTHELIAL_CELLS_VIA_CYTOSKELETON_REARRANGEMENT | MATHEW_FANCONI_ANEMIA_GENES | WALLACE_PROSTATE_CANCER_UP |
| REACTOME_RRNA_PROCESSING | BIOCARTA_MCALPAIN_PATHWAY | FLORIO_NEOCORTEX_BASAL_RADIAL_GLIA_UP | KEGG_OXIDATIVE_PHOSPHORYLATION |
| FLOTHO_PEDIATRIC_ALL_THERAPY_RESPONSE_UP | GRAHAM_CML_DIVIDING_VS_NORMAL_DIVIDING_UP | STAMBOLSKY_BOUND_BY_MUTATED_TP53 | WP_OXIDATIVE_PHOSPHORYLATION |
| REACTOME_SIGNALING_BY_ROBO_RECEPTORS | PID_THROMBIN_PAR1_PATHWAY | HOEGERKORP_CD44_TARGETS_DIRECT_DN | REACTOME_REGULATION_OF_PTEN_STABILITY_AND_ACTIVITY |
| HAHTOLA_MYCOSIS_FUNGOIDES_DN | REACTOME_MET_ACTIVATES_RAP1_AND_RAC1 | CONRAD_STEM_CELL | MOOTHA_VOXPHOS |
| HOLLEMAN_VINCRISTINE_RESISTANCE_B_ALL_DN | REACTOME_RUNX1_REGULATES_GENES_INVOLVED_IN_MEGAKARYOCYTE_DIFFERENTIATION_AND_PLATELET_FUNCTION | STEGER_ADIPOGENESIS_UP | REACTOME_G1_S_DNA_DAMAGE_CHECKPOINTS |
| ANDERSEN_LIVER_CANCER_KRT19_UP | BIOCARTA_PAR1_PATHWAY | HOLLERN_SOLID_NODULAR_BREAST_TUMOR_UP | JIANG_AGING_HYPOTHALAMUS_UP |
| MODY_HIPPOCAMPUS_PRENATAL | WELCH_GATA1_TARGETS | WP_ESTROGEN_METABOLISM | REACTOME_STABILIZATION_OF_P53 |
| YAMASHITA_LIVER_CANCER_WITH_EPCAM_UP | REACTOME_ELEVATION_OF_CYTOSOLIC_CA2_LEVELS | BIOCARTA_FIBRINOLYSIS_PATHWAY | REACTOME_APC_C_CDH1_MEDIATED_DEGRADATION_OF_CDC20_AND_OTHER_APC_C_CDH1_TARGETED_PROTEINS_IN_LATE_MITOSIS_EARLY_G1 |
| HOLLEMAN_ASPARAGINASE_RESISTANCE_ALL_UP | PID_PRL_SIGNALING_EVENTS_PATHWAY | SU_SALIVARY_GLAND | SCHLOSSER_MYC_TARGETS_AND_SERUM_RESPONSE_UP |
| JISON_SICKLE_CELL_DISEASE_DN | REACTOME_GP1B_IX_V_ACTIVATION_SIGNALLING | REACTOME_TIGHT_JUNCTION_INTERACTIONS | REACTOME_REGULATION_OF_RUNX2_EXPRESSION_AND_ACTIVITY |
| LUI_THYROID_CANCER_CLUSTER_3 | REACTOME_DCC_MEDIATED_ATTRACTIVE_SIGNALING | REACTOME_CELLULAR_HEXOSE_TRANSPORT | REACTOME_ABC_TRANSPORTER_DISORDERS |
| POMEROY_MEDULLOBLASTOMA_PROGNOSIS_DN | REACTOME_FOXO_MEDIATED_TRANSCRIPTION_OF_CELL_CYCLE_GENES | FLORIO_NEOCORTEX_BASAL_RADIAL_GLIA_DN | REACTOME_ASYMMETRIC_LOCALIZATION_OF_PCP_PROTEINS |
| REACTOME_TRANSLATION | PID_SMAD2_3PATHWAY | ROETH_TERT_TARGETS_UP | YAO_TEMPORAL_RESPONSE_TO_PROGESTERONE_CLUSTER_10 |
| REACTOME_PD_1_SIGNALING | REACTOME_COMMON_PATHWAY_OF_FIBRIN_CLOT_FORMATION | BLANCO_MELO_COVID19_SARS_COV_2_LOW_MOI_INFECTION_A594_ACE2_EXPRESSING_CELLS_DN | YAO_TEMPORAL_RESPONSE_TO_PROGESTERONE_CLUSTER_14 |
| NEBEN_AML_WITH_FLT3_OR_NRAS_DN | PID_EPO_PATHWAY | WP_GENES_RELATED_TO_PRIMARY_CILIUM_DEVELOPMENT_BASED_ON_CRISPR | BIOCARTA_SM_PATHWAY |
| KIM_LRRC3B_TARGETS | YAO_TEMPORAL_RESPONSE_TO_PROGESTERONE_CLUSTER_3 | MEBARKI_HCC_PROGENITOR_WNT_DN_CTNNB1_DEPENDENT | KEGG_PARKINSONS_DISEASE |
| LEE_DIFFERENTIATING_T_LYMPHOCYTE | REACTOME_ERYTHROPOIETIN_ACTIVATES_PHOSPHOINOSITIDE_3_KINASE_PI3K_ | REACTOME_ACYL_CHAIN_REMODELLING_OF_PE | REACTOME_ORC1_REMOVAL_FROM_CHROMATIN |
| BIOCARTA_MONOCYTE_PATHWAY | BIOCARTA_AHSP_PATHWAY | REACTOME_PI3K_EVENTS_IN_ERBB4_SIGNALING | REACTOME_RUNX1_REGULATES_TRANSCRIPTION_OF_GENES_INVOLVED_IN_DIFFERENTIATION_OF_HSCS |
| TIEN_INTESTINE_PROBIOTICS_2HR_UP | SCIBETTA_KDM5B_TARGETS_UP | REACTOME_SHC1_EVENTS_IN_ERBB2_SIGNALING | WP_ELECTRON_TRANSPORT_CHAIN_OXPHOS_SYSTEM_IN_MITOCHONDRIA |
| PECE_MAMMARY_STEM_CELL_UP | REACTOME_SIGNALING_BY_HIPPO | FOURNIER_ACINAR_DEVELOPMENT_LATE_UP | REACTOME_ASSEMBLY_OF_THE_PRE_REPLICATIVE_COMPLEX |
| FLECHNER_BIOPSY_KIDNEY_TRANSPLANT_REJECTED_VS_OK_UP | BIOCARTA_MYOSIN_PATHWAY | REACTOME_UNWINDING_OF_DNA | SANA_RESPONSE_TO_IFNG_DN |
| BIOCARTA_IL17_PATHWAY | REACTOME_PLATELET_AGGREGATION_PLUG_FORMATION_ | BLANCO_MELO_SARS_COV_1_INFECTION_MCR5_CELLS_UP | REACTOME_CYCLIN_A_CDK2_ASSOCIATED_EVENTS_AT_S_PHASE_ENTRY |
| XU_RESPONSE_TO_TRETINOIN_AND_NSC682994_UP | BIOCARTA_PLCE_PATHWAY | REACTOME_NITRIC_OXIDE_STIMULATES_GUANYLATE_CYCLASE | REACTOME_RESPIRATORY_ELECTRON_TRANSPORT |
| NEWMAN_ERCC6_TARGETS_UP | LUND_SILENCED_BY_METHYLATION | REACTOME_ACYL_CHAIN_REMODELLING_OF_PI | REACTOME_REGULATION_OF_RUNX3_EXPRESSION_AND_ACTIVITY |
| POMEROY_MEDULLOBLASTOMA_DESMOPLASIC_VS_CLASSIC_DN | GARGALOVIC_RESPONSE_TO_OXIDIZED_PHOSPHOLIPIDS_LIGHTYELLOW_UP | REACTOME_ACTIVATION_OF_THE_PHOTOTRANSDUCTION_CASCADE | REACTOME_CELLULAR_RESPONSE_TO_HYPOXIA |
| REACTOME_REGULATION_OF_TP53_ACTIVITY_THROUGH_METHYLATION | REACTOME_PLATELET_ACTIVATION_SIGNALING_AND_AGGREGATION | PID_RHODOPSIN_PATHWAY | REACTOME_APC_C_MEDIATED_DEGRADATION_OF_CELL_CYCLE_PROTEINS |
| WU_ALZHEIMER_DISEASE_DN | REACTOME_RESPONSE_TO_ELEVATED_PLATELET_CYTOSOLIC_CA2_ | FINETTI_BREAST_CANCER_KINOME_RED | YAO_TEMPORAL_RESPONSE_TO_PROGESTERONE_CLUSTER_17 |
| BOGNI_TREATMENT_RELATED_MYELOID_LEUKEMIA_UP | REACTOME_INTEGRIN_SIGNALING | GARGALOVIC_RESPONSE_TO_OXIDIZED_PHOSPHOLIPIDS_MAGENTA_DN | CAFFAREL_RESPONSE_TO_THC_8HR_5_DN |
| OSMAN_BLADDER_CANCER_DN | LOPEZ_MESOTHELIOMA_SURVIVAL_UP | SCHLESINGER_H3K27ME3_IN_NORMAL_AND_METHYLATED_IN_CANCER | REACTOME_ATF6_ATF6_ALPHA_ACTIVATES_CHAPERONE_GENES |
| MARSON_FOXP3_CORE_DIRECT_TARGETS | PID_TXA2PATHWAY | CADWELL_ATG16L1_TARGETS_UP | YANG_BREAST_CANCER_ESR1_BULK_UP |
| WINTER_HYPOXIA_DN | PID_S1P_S1P3_PATHWAY | REACTOME_ACYL_CHAIN_REMODELLING_OF_PC | DELPUECH_FOXO3_TARGETS_DN |
| WP_PATHOGENESIS_OF_SARSCOV2_MEDIATED_BY_NSP9NSP10_COMPLEX | TAVOR_CEBPA_TARGETS_DN | KORKOLA_CORRELATED_WITH_POU5F1 | COLLER_MYC_TARGETS_UP |
| BILANGES_RAPAMYCIN_SENSITIVE_GENES | BIOCARTA_ECM_PATHWAY | WP_EICOSANOID_METABOLISM_VIA_LIPO_OXYGENASES_LOX | REACTOME_HSF1_ACTIVATION |
| BIOCARTA_CTLA4_PATHWAY | PID_NECTIN_PATHWAY | BIOCARTA_ATRBRCA_PATHWAY | REACTOME_RESPIRATORY_ELECTRON_TRANSPORT_ATP_SYNTHESIS_BY_CHEMIOSMOTIC_COUPLING_AND_HEAT_PRODUCTION_BY_UNCOUPLING_PROTEINS_ |
| HSIAO_HOUSEKEEPING_GENES | DORSEY_GAB2_TARGETS | MEBARKI_HCC_PROGENITOR_WNT_DN_BLOCKED_BY_FZD8CRD | REACTOME_REGULATION_OF_RAS_BY_GAPS |
| WP_GANGLIO_SPHINGOLIPID_METABOLISM | KAMIKUBO_MYELOID_MN1_NETWORK | KEGG_ALPHA_LINOLENIC_ACID_METABOLISM | MALONEY_RESPONSE_TO_17AAG_DN |
| LUI_TARGETS_OF_PAX8_PPARG_FUSION | REACTOME_THROMBIN_SIGNALLING_THROUGH_PROTEINASE_ACTIVATED_RECEPTORS_PARS_ | WP_LEPTIN_AND_ADIPONECTIN | ZHONG_SECRETOME_OF_LUNG_CANCER_AND_MACROPHAGE |
| LUI_THYROID_CANCER_PAX8_PPARG_DN | BIOCARTA_EGFR_SMRTE_PATHWAY | REACTOME_PEROXISOMAL_LIPID_METABOLISM | TOMLINS_PROSTATE_CANCER_UP |
| ZHENG_FOXP3_TARGETS_IN_T_LYMPHOCYTE_DN | BOYLAN_MULTIPLE_MYELOMA_D_CLUSTER_DN | GAVIN_PDE3B_TARGETS | HWANG_PROSTATE_CANCER_MARKERS |
| BOYAULT_LIVER_CANCER_SUBCLASS_G5_DN | BIOCARTA_MEF2D_PATHWAY | BLANCO_MELO_BRONCHIAL_EPITHELIAL_CELLS_INFLUENZA_A_DEL_NS1_INFECTION_DN | REACTOME_SWITCHING_OF_ORIGINS_TO_A_POST_REPLICATIVE_STATE |
| PARK_APL_PATHOGENESIS_UP | WP_OVERVIEW_OF_LEUKOCYTEINTRINSIC_HIPPO_PATHWAY_FUNCTIONS | WP_TAMOXIFEN_METABOLISM | HOFMANN_MYELODYSPLASTIC_SYNDROM_LOW_RISK_DN |
| FARMER_BREAST_CANCER_CLUSTER_1 | BIOCARTA_CCR3_PATHWAY | WAGNER_APO2_SENSITIVITY | REACTOME_COMPLEX_I_BIOGENESIS |
| REACTOME_METABOLISM_OF_AMINO_ACIDS_AND_DERIVATIVES | REACTOME_GPVI_MEDIATED_ACTIVATION_CASCADE | WP_TRYPTOPHAN_CATABOLISM_LEADING_TO_NAD_PRODUCTION | PELLICCIOTTA_HDAC_IN_ANTIGEN_PRESENTATION_DN |
| PID_IL12_STAT4_PATHWAY | HE_PTEN_TARGETS_UP | REACTOME_PI_3K_CASCADE_FGFR2 | BURTON_ADIPOGENESIS_5 |
| DIAZ_CHRONIC_MEYLOGENOUS_LEUKEMIA_DN | REACTOME_RETROGRADE_NEUROTROPHIN_SIGNALLING | NIKOLSKY_BREAST_CANCER_7Q21_Q22_AMPLICON | REACTOME_DNA_REPLICATION_PRE_INITIATION |
| PARK_HSC_VS_MULTIPOTENT_PROGENITORS_DN | PID_ECADHERIN_STABILIZATION_PATHWAY | REACTOME_THE_CANONICAL_RETINOID_CYCLE_IN_RODS_TWILIGHT_VISION_ | REACTOME_INTERCONVERSION_OF_NUCLEOTIDE_DI_AND_TRIPHOSPHATES |
| WIELAND_UP_BY_HBV_INFECTION | PID_ILK_PATHWAY | ZHAN_MULTIPLE_MYELOMA_PR_UP | WHITESIDE_CISPLATIN_RESISTANCE_UP |
| BIOCARTA_LYM_PATHWAY | BIOCARTA_HDAC_PATHWAY | REACTOME_PHASE_2_PLATEAU_PHASE | AIYAR_COBRA1_TARGETS_DN |
| BIOCARTA_NO2IL12_PATHWAY | PID_P38_MKK3_6PATHWAY | REACTOME_FGFR2_LIGAND_BINDING_AND_ACTIVATION | REACTOME_ATTENUATION_PHASE |
| PARK_HSC_VS_MULTIPOTENT_PROGENITORS_UP | GENTILE_UV_RESPONSE_CLUSTER_D8 | SUMI_HNF4A_TARGETS | ZHOU_TNF_SIGNALING_30MIN |
| KEGG_PRIMARY_IMMUNODEFICIENCY | BIOCARTA_CALCINEURIN_PATHWAY | WP_FARNESOID_X_RECEPTOR_PATHWAY | PELLICCIOTTA_HDAC_IN_ANTIGEN_PRESENTATION_UP |
| REACTOME_TICAM1_DEPENDENT_ACTIVATION_OF_IRF3_IRF7 | JISON_SICKLE_CELL_DISEASE_UP | MATZUK_SPERMATOGONIA | MARKS_ACETYLATED_NON_HISTONE_PROTEINS |
| FERRANDO_TAL1_NEIGHBORS | WP_ENDOTHELIN_PATHWAYS | JI_METASTASIS_REPRESSED_BY_STK11 | KUROKAWA_LIVER_CANCER_EARLY_RECURRENCE_UP |
| MARSON_FOXP3_TARGETS_STIMULATED_UP | REACTOME_PRE_NOTCH_PROCESSING_IN_GOLGI | WP_MAMMARY_GLAND_DEVELOPMENT_PATHWAY_INVOLUTION_STAGE_4_OF_4 | SCHLOSSER_MYC_TARGETS_AND_SERUM_RESPONSE_DN |
| TONG_INTERACT_WITH_PTTG1 | REACTOME_TRANSPORT_OF_CONNEXONS_TO_THE_PLASMA_MEMBRANE | WP_SPHINGOLIPID_METABOLISM_INTEGRATED_PATHWAY | REACTOME_REGULATION_OF_MRNA_STABILITY_BY_PROTEINS_THAT_BIND_AU_RICH_ELEMENTS |
| GREENBAUM_E2A_TARGETS_DN | ACOSTA_PROLIFERATION_INDEPENDENT_MYC_TARGETS_DN | REACTOME_POU5F1_OCT4_SOX2_NANOG_ACTIVATE_GENES_RELATED_TO_PROLIFERATION | REACTOME_MITOCHONDRIAL_CALCIUM_ION_TRANSPORT |
| WALLACE_PROSTATE_CANCER_RACE_UP | PID_PI3KCI_AKT_PATHWAY | REACTOME_CDC6_ASSOCIATION_WITH_THE_ORC_ORIGIN_COMPLEX | REACTOME_SIGNALING_BY_NOTCH4 |
| REACTOME_TRANSLATION_OF_STRUCTURAL_PROTEINS | REACTOME_ERYTHROPOIETIN_ACTIVATES_RAS | KIM_MYC_AMPLIFICATION_TARGETS_DN | WP_MITOCHONDRIAL_COMPLEX_I_ASSEMBLY_MODEL_OXPHOS_SYSTEM |
| WP_CANCER_IMMUNOTHERAPY_BY_PD1_BLOCKADE | BIOCARTA_EPONFKB_PATHWAY | REACTOME_SYNTHESIS_OF_BILE_ACIDS_AND_BILE_SALTS_VIA_27_HYDROXYCHOLESTEROL | LI_AMPLIFIED_IN_LUNG_CANCER |
| FINETTI_BREAST_CANCER_KINOME_GREEN | REACTOME_INTRINSIC_PATHWAY_OF_FIBRIN_CLOT_FORMATION | WP_COVID19_ADVERSE_OUTCOME_PATHWAY | REACTOME_DEGRADATION_OF_BETA_CATENIN_BY_THE_DESTRUCTION_COMPLEX |
| NUTT_GBM_VS_AO_GLIOMA_DN | MACLACHLAN_BRCA1_TARGETS_UP | REACTOME_IRAK4_DEFICIENCY_TLR2_4_ | WONG_MITOCHONDRIA_GENE_MODULE |
| DISTECHE_ESCAPED_FROM_X_INACTIVATION | PID_FAK_PATHWAY | DACOSTA_UV_RESPONSE_VIA_ERCC3_XPCS_UP | CREIGHTON_AKT1_SIGNALING_VIA_MTOR_UP |
| BIOCARTA_CSK_PATHWAY | REACTOME_INTERLEUKIN_6_SIGNALING | REACTOME_XENOBIOTICS | SCHLOSSER_MYC_AND_SERUM_RESPONSE_SYNERGY |
| SPIELMAN_LYMPHOBLAST_EUROPEAN_VS_ASIAN_2FC_DN | BIOCARTA_ACTINY_PATHWAY | WP_CILIOPATHIES | REACTOME_FORMATION_OF_TUBULIN_FOLDING_INTERMEDIATES_BY_CCT_TRIC |
| KYNG_RESPONSE_TO_H2O2_VIA_ERCC6 | PID_HDAC_CLASSIII_PATHWAY | WP_TYPE_II_DIABETES_MELLITUS | BOYAULT_LIVER_CANCER_SUBCLASS_G123_UP |
| MORI_LARGE_PRE_BII_LYMPHOCYTE_DN | REACTOME_FORMATION_OF_FIBRIN_CLOT_CLOTTING_CASCADE_ | REACTOME_PI_3K_CASCADE_FGFR1 | YANG_BREAST_CANCER_ESR1_UP |
| REACTOME_SIGNALING_BY_NOTCH1_HD_DOMAIN_MUTANTS_IN_CANCER | REACTOME_SEMA4D_IN_SEMAPHORIN_SIGNALING | VICENT_METASTASIS_UP | ZHAN_MULTIPLE_MYELOMA_SUBGROUPS |
| REACTOME_TRAF6_MEDIATED_IRF7_ACTIVATION_IN_TLR7_8_OR_9_SIGNALING | PID_S1P_S1P1_PATHWAY | REACTOME_DEFECTIVE_C1GALT1C1_CAUSES_TN_POLYAGGLUTINATION_SYNDROME_TNPS_ | SCHUHMACHER_MYC_TARGETS_UP |
| PID_CD8_TCR_DOWNSTREAM_PATHWAY | REACTOME_RHO_GTPASES_ACTIVATE_IQGAPS | REACTOME_REGULATION_OF_GENE_EXPRESSION_IN_BETA_CELLS | OUELLET_OVARIAN_CANCER_INVASIVE_VS_LMP_UP |
| TIEN_INTESTINE_PROBIOTICS_24HR_DN | BIOCARTA_CBL_PATHWAY | GINESTIER_BREAST_CANCER_ZNF217_AMPLIFIED_UP | REACTOME_PCP_CE_PATHWAY |
| KEGG_GLYCOSPHINGOLIPID_BIOSYNTHESIS_GANGLIO_SERIES | BARRIER_CANCER_RELAPSE_TUMOR_SAMPLE_DN | WP_ESTROGEN_RECEPTOR_PATHWAY | REACTOME_HEDGEHOG_OFF_STATE |
| REACTOME_RIPK1_MEDIATED_REGULATED_NECROSIS | TSUDA_ALVEOLAR_SOFT_PART_SARCOMA | REACTOME_SYNTHESIS_OF_PROSTAGLANDINS_PG_AND_THROMBOXANES_TX_ | CHANDRAN_METASTASIS_TOP50_UP |
| GUTIERREZ_CHRONIC_LYMPHOCYTIC_LEUKEMIA_UP | REACTOME_SEALING_OF_THE_NUCLEAR_ENVELOPE_NE_BY_ESCRT_III | REACTOME_GRB2_EVENTS_IN_ERBB2_SIGNALING | SESTO_RESPONSE_TO_UV_C6 |
| RAY_TARGETS_OF_P210_BCR_ABL_FUSION_DN | PID_ECADHERIN_KERATINOCYTE_PATHWAY | REACTOME_KETONE_BODY_METABOLISM | WP_INTRAFLAGELLAR_TRANSPORT_PROTEINS_BINDING_TO_DYNEIN |
