# Supplementary material for: Marker-free characterization of full-length transcriptomes of single live circulating tumor cells
Source: HighWire-hosted journal article supplement (doi:10.1101/gr.276600.122), 2022-11-22
Supplement: Supplemental_Table_S7.docx [file Supplemental_Table_S7.docx]

**Supplementary Table S7:** Differential genes across CTCs of three different subtypes.

| **Gene name** | **Subtype** |
| --- | --- |
| *PPEF1* | TNBC |
| *C12orf29* | TNBC |
| *FOXP1* | TNBC |
| *APOL4* | TNBC |
| *LINC00620* | TNBC |
| *TBL1XR1* | TNBC |
| *CLEC2D* | TNBC |
| *GUSBP1* | TNBC |
| *C18orf26* | TNBC |
| *EIF3C* | TNBC |
| *RAD54L2* | HER2+ |
| *FLT4* | HER2+ |
| *EIF4E* | HER2+ |
| *DIS3L2* | HER2+ |
| *HMGN4* | HER2+ |
| *TRIM26* | HER2+ |
| *UBR7* | HER2+ |
| *HEYL* | HER2+ |
| *LCOR* | HER2+ |
| *LOC92249* | HER2+ |
| *H3F3B* | ER+/PR+ |
| *SCN3A* | ER+/PR+ |
| *PRKD3* | ER+/PR+ |
| *RHOF* | ER+/PR+ |
| *H3F3C* | ER+/PR+ |
| *LOC151658* | ER+/PR+ |
| *SLC25A37* | ER+/PR+ |
| *SHF* | ER+/PR+ |
| *CREBL2* | ER+/PR+ |
| *ATF6* | ER+/PR+ |
