# Supplementary material for: Marker-free characterization of full-length transcriptomes of single live circulating tumor cells
Source: HighWire-hosted journal article supplement (doi:10.1101/gr.276600.122), 2022-11-22
Supplement: Supplemental_Table_S9.xlsx [file Supplemental_Table_S9.xlsx]

## Sheet: CNV_events_in_chromosopmes
Supplementary Table S9. CNV events in Ebright CTCs.
Cells	State	Chr omosome arm
Ebright et al. CTCs	4	Chr 1p36.32
Ebright et al. CTCs	2	Chr 1p36.11
Ebright et al. CTCs	3	Chr 1p34.1
Ebright et al. CTCs	2	Chr 1p31.1
Ebright et al. CTCs	2	Chr 1q21.3
Ebright et al. CTCs	3	Chr 1q44
Ebright et al. CTCs	3	Chr 2 p25.3
Ebright et al. CTCs	4	Chr 2 q37.3
Ebright et al. CTCs	2	Chr 3q25.1
Ebright et al. CTCs	4	Chr 3q29
Ebright et al. CTCs	4	Chr 4p16.3
Ebright et al. CTCs	2	Chr 5q35.2
Ebright et al. CTCs	4	Chr 6p25.3
Ebright et al. CTCs	2	Chr 6p21.33
Ebright et al. CTCs	4	Chr 6p21.2
Ebright et al. CTCs	2	Chr 6q21
Ebright et al. CTCs	4	Chr 7p22.3
Ebright et al. CTCs	4	Chr 7q36.3
Ebright et al. CTCs	4	Chr 8q11.23
Ebright et al. CTCs	2	Chr 8q24.11
Ebright et al. CTCs	3	Chr 8q24.3
Ebright et al. CTCs	3	Chr 9q22.33
Ebright et al. CTCs	2	Chr 11p15.5
Ebright et al. CTCs	4	Chr 11p15.4
Ebright et al. CTCs	2	Chr 11q13.2
Ebright et al. CTCs	2	Chr 11q23.3
Ebright et al. CTCs	4	Chr 11q25
Ebright et al. CTCs	2	Chr 12p13.31
Ebright et al. CTCs	2	Chr 12q13.3
Ebright et al. CTCs	2	Chr 12q23.2
Ebright et al. CTCs	4	Chr 12q24.33
Ebright et al. CTCs	2	Chr 13q22.2
Ebright et al. CTCs	3	Chr 13q34
Ebright et al. CTCs	2	Chr 14q22.3
Ebright et al. CTCs	4	Chr 15q15.3
Ebright et al. CTCs	3	Chr 16p13.3
Ebright et al. CTCs	4	Chr 16q24.1
Ebright et al. CTCs	3	Chr 17p13.3
Ebright et al. CTCs	2	Chr 17p13.1
Ebright et al. CTCs	4	Chr 17q12
Ebright et al. CTCs	4	Chr 17q25.1
Ebright et al. CTCs	4	Chr 18q23
Ebright et al. CTCs	2	Chr 19p13.2
Ebright et al. CTCs	3	Chr 19q13.11
Ebright et al. CTCs	3	Chr 19q13.2
Ebright et al. CTCs	3	Chr 19q13.32
Ebright et al. CTCs	2	Chr 19q13.33
Ebright et al. CTCs	3	Chr 19q13.43
Ebright et al. CTCs	3	Chr 20q13.33
Ebright et al. CTCs	4	Chr 22q11.21
Ebright et al. CTCs	3	Chr 22q11.22

## Sheet: HMM_cnv_predictions_in_genes
Supplementary Table S9. CNV events in genes in Ebright et al. CTCs.
cells	Chr omosome region	state	gene	Chr	start	end
Ebright et al. CTCs	Chr 1-region2	4	TPRG1L	Chr 1	3541566	3546691
Ebright et al. CTCs	Chr 1-region2	4	WRAP73	Chr 1	3547331	3569325
Ebright et al. CTCs	Chr 1-region2	4	TP73	Chr 1	3569084	3652765
Ebright et al. CTCs	Chr 1-region2	4	LRRC47	Chr 1	3696784	3713068
Ebright et al. CTCs	Chr 1-region2	4	CEP104	Chr 1	3728645	3773778
Ebright et al. CTCs	Chr 1-region2	4	DFFB	Chr 1	3773845	3801993
Ebright et al. CTCs	Chr 1-region2	4	C1orf174	Chr 1	3805689	3816857
Ebright et al. CTCs	Chr 1-region2	4	NPHP4	Chr 1	5922871	6052533
Ebright et al. CTCs	Chr 1-region2	4	KCNAB2	Chr 1	6051526	6161253
Ebright et al. CTCs	Chr 1-region2	4	RPL22	Chr 1	6241329	6269449
Ebright et al. CTCs	Chr 1-region2	4	RNF207	Chr 1	6265535	6281359
Ebright et al. CTCs	Chr 1-region2	4	ICMT	Chr 1	6281253	6296032
Ebright et al. CTCs	Chr 1-region2	4	GPR153	Chr 1	6307406	6321035
Ebright et al. CTCs	Chr 1-region2	4	ACOT7	Chr 1	6324329	6454451
Ebright et al. CTCs	Chr 1-region2	4	HES2	Chr 1	6472478	6484730
Ebright et al. CTCs	Chr 1-region2	4	ESPN	Chr 1	6484848	6521430
Ebright et al. CTCs	Chr 1-region2	4	TNFRSF25	Chr 1	6521211	6526255
Ebright et al. CTCs	Chr 1-region2	4	PLEKHG5	Chr 1	6526152	6580121
Ebright et al. CTCs	Chr 1-region2	4	NOL9	Chr 1	6581407	6614595
Ebright et al. CTCs	Chr 1-region2	4	ZBTB48	Chr 1	6640061	6649340
Ebright et al. CTCs	Chr 1-region2	4	KLHL21	Chr 1	6650784	6674667
Ebright et al. CTCs	Chr 1-region2	4	PHF13	Chr 1	6673745	6684093
Ebright et al. CTCs	Chr 1-region2	4	THAP3	Chr 1	6684926	6695646
Ebright et al. CTCs	Chr 1-region2	4	DNAJC11	Chr 1	6694228	6761984
Ebright et al. CTCs	Chr 1-region2	4	CAMTA1	Chr 1	6845384	7829766
Ebright et al. CTCs	Chr 1-region2	4	VAMP3	Chr 1	7831329	7841492
Ebright et al. CTCs	Chr 1-region2	4	PER3	Chr 1	7844380	7905237
Ebright et al. CTCs	Chr 1-region2	4	PARK7	Chr 1	8014351	8045565
Ebright et al. CTCs	Chr 1-region2	4	ERRFI1	Chr 1	8064464	8086368
Ebright et al. CTCs	Chr 1-region2	4	RERE	Chr 1	8412457	8877702
Ebright et al. CTCs	Chr 1-region2	4	ENO1	Chr 1	8921061	8939308
Ebright et al. CTCs	Chr 1-region2	4	SLC2A5	Chr 1	9095166	9148537
Ebright et al. CTCs	Chr 1-region2	4	GPR157	Chr 1	9160364	9189229
Ebright et al. CTCs	Chr 1-region2	4	H6PD	Chr 1	9294834	9331396
Ebright et al. CTCs	Chr 1-region2	4	SPSB1	Chr 1	9352939	9429591
Ebright et al. CTCs	Chr 1-region2	4	SLC25A33	Chr 1	9599541	9645237
Ebright et al. CTCs	Chr 1-region2	4	TMEM201	Chr 1	9648932	9674935
Ebright et al. CTCs	Chr 1-region2	4	PIK3CD	Chr 1	9711790	9789172
Ebright et al. CTCs	Chr 1-region2	4	CLSTN1	Chr 1	9789084	9884584
Ebright et al. CTCs	Chr 1-region2	4	CTNNBIP1	Chr 1	9908334	9970394
Ebright et al. CTCs	Chr 1-region2	4	LZIC	Chr 1	9982173	10003465
Ebright et al. CTCs	Chr 1-region2	4	NMNAT1	Chr 1	10003486	10045559
Ebright et al. CTCs	Chr 1-region2	4	UBE4B	Chr 1	10092890	10241297
Ebright et al. CTCs	Chr 1-region2	4	KIF1B	Chr 1	10270863	10441661
Ebright et al. CTCs	Chr 1-region2	4	PGD	Chr 1	10458649	10480201
Ebright et al. CTCs	Chr 1-region2	4	DFFA	Chr 1	10516579	10532583
Ebright et al. CTCs	Chr 1-region2	4	CASZ1	Chr 1	10696661	10856707
Ebright et al. CTCs	Chr 1-region2	4	TARDBP	Chr 1	11072414	11085796
Ebright et al. CTCs	Chr 1-region2	4	SRM	Chr 1	11114641	11120081
Ebright et al. CTCs	Chr 1-region2	4	EXOSC10	Chr 1	11126675	11159938
Ebright et al. CTCs	Chr 1-region2	4	MTOR	Chr 1	11166592	11322564
Ebright et al. CTCs	Chr 1-region2	4	UBIAD1	Chr 1	11333263	11356106
Ebright et al. CTCs	Chr 1-region2	4	FBXO44	Chr 1	11714432	11723384
Ebright et al. CTCs	Chr 1-region2	4	FBXO6	Chr 1	11724181	11734411
Ebright et al. CTCs	Chr 1-region2	4	MAD2L2	Chr 1	11734537	11751707
Ebright et al. CTCs	Chr 1-region2	4	DRAXIN	Chr 1	11751786	11785914
Ebright et al. CTCs	Chr 1-region2	4	AGTRAP	Chr 1	11796141	11814859
Ebright et al. CTCs	Chr 1-region2	4	MTHFR	Chr 1	11845780	11866977
Ebright et al. CTCs	Chr 1-region2	4	CLCN6	Chr 1	11866207	11903201
Ebright et al. CTCs	Chr 1-region2	4	KIAA2013	Chr 1	11979648	11986485
Ebright et al. CTCs	Chr 1-region2	4	PLOD1	Chr 1	11994262	12035595
Ebright et al. CTCs	Chr 1-region2	4	MFN2	Chr 1	12040238	12073571
Ebright et al. CTCs	Chr 1-region2	4	MIIP	Chr 1	12079523	12092102
Ebright et al. CTCs	Chr 1-region2	4	TNFRSF1B	Chr 1	12227060	12269285
Ebright et al. CTCs	Chr 1-region2	4	VPS13D	Chr 1	12290124	12572099
Ebright et al. CTCs	Chr 1-region2	4	DHRS3	Chr 1	12627939	12677737
Ebright et al. CTCs	Chr 1-region2	4	PRDM2	Chr 1	14026693	14151574
Ebright et al. CTCs	Chr 1-region2	4	KAZN	Chr 1	14925200	15444539
Ebright et al. CTCs	Chr 1-region2	4	TMEM51	Chr 1	15479028	15546976
Ebright et al. CTCs	Chr 1-region2	4	FHAD1	Chr 1	15573768	15726779
Ebright et al. CTCs	Chr 1-region2	4	EFHD2	Chr 1	15736391	15756839
Ebright et al. CTCs	Chr 1-region2	4	CTRC	Chr 1	15764935	15775737
Ebright et al. CTCs	Chr 1-region2	4	CASP9	Chr 1	15817327	15853029
Ebright et al. CTCs	Chr 1-region2	4	DNAJC16	Chr 1	15853308	15918874
Ebright et al. CTCs	Chr 1-region2	4	AGMAT	Chr 1	15898848	15911605
Ebright et al. CTCs	Chr 1-region2	4	DDI2	Chr 1	15943995	15995539
Ebright et al. CTCs	Chr 1-region2	4	RSC1A1	Chr 1	15986364	15988217
Ebright et al. CTCs	Chr 1-region2	4	PLEKHM2	Chr 1	16010827	16061264
Ebright et al. CTCs	Chr 1-region2	4	SLC25A34	Chr 1	16062900	16067891
Ebright et al. CTCs	Chr 1-region2	4	FBLIM1	Chr 1	16083102	16113089
Ebright et al. CTCs	Chr 1-region2	4	SPEN	Chr 1	16174359	16266955
Ebright et al. CTCs	Chr 1-region2	4	ZBTB17	Chr 1	16268364	16302627
Ebright et al. CTCs	Chr 1-region2	4	C1orf64	Chr 1	16330731	16335302
Ebright et al. CTCs	Chr 1-region2	4	ARHGEF19	Chr 1	16524349	16539104
Ebright et al. CTCs	Chr 1-region2	4	FBXO42	Chr 1	16573334	16678949
Ebright et al. CTCs	Chr 1-region2	4	SZRD1	Chr 1	16679070	16724640
Ebright et al. CTCs	Chr 1-region2	4	SPATA21	Chr 1	16713612	16763919
Ebright et al. CTCs	Chr 1-region2	4	NECAP2	Chr 1	16767167	16786573
Ebright et al. CTCs	Chr 1-region2	4	NBPF1	Chr 1	16888814	16940057
Ebright et al. CTCs	Chr 1-region2	4	CROCCP2	Chr 1	16944751	16971178
Ebright et al. CTCs	Chr 1-region2	4	CROCC	Chr 1	17066768	17299474
Ebright et al. CTCs	Chr 1-region2	4	ATP13A2	Chr 1	17312453	17338423
Ebright et al. CTCs	Chr 1-region2	4	SDHB	Chr 1	17345217	17380665
Ebright et al. CTCs	Chr 1-region2	4	PADI2	Chr 1	17393256	17445948
Ebright et al. CTCs	Chr 1-region2	4	PADI4	Chr 1	17634690	17690499
Ebright et al. CTCs	Chr 1-region2	4	AC004824.2	Chr 1	17655507	17676070
Ebright et al. CTCs	Chr 1-region2	4	RCC2	Chr 1	17733256	17766220
Ebright et al. CTCs	Chr 1-region2	4	ARHGEF10L	Chr 1	17866330	18024369
Ebright et al. CTCs	Chr 1-region2	4	IGSF21	Chr 1	18434240	18704977
Ebright et al. CTCs	Chr 1-region2	4	ALDH4A1	Chr 1	19197926	19229275
Ebright et al. CTCs	Chr 1-region2	4	UBR4	Chr 1	19401000	19536770
Ebright et al. CTCs	Chr 1-region2	4	EMC1	Chr 1	19542158	19578046
Ebright et al. CTCs	Chr 1-region2	4	MRTO4	Chr 1	19578033	19586622
Ebright et al. CTCs	Chr 1-region4	2	CNR2	Chr 1	24197016	24285549
Ebright et al. CTCs	Chr 1-region4	2	PNRC2	Chr 1	24285599	24289952
Ebright et al. CTCs	Chr 1-region4	2	SRSF10	Chr 1	24291294	24307417
Ebright et al. CTCs	Chr 1-region4	2	IFNLR1	Chr 1	24480647	24514449
Ebright et al. CTCs	Chr 1-region4	2	NIPAL3	Chr 1	24742284	24799466
Ebright et al. CTCs	Chr 1-region4	2	RCAN3	Chr 1	24829387	24867530
Ebright et al. CTCs	Chr 1-region4	2	SRRM1	Chr 1	24958207	24999758
Ebright et al. CTCs	Chr 1-region4	2	CLIC4	Chr 1	25071848	25170815
Ebright et al. CTCs	Chr 1-region4	2	RUNX3	Chr 1	25226002	25291612
Ebright et al. CTCs	Chr 1-region4	2	SYF2	Chr 1	25549170	25558993
Ebright et al. CTCs	Chr 1-region4	2	C1orf63	Chr 1	25568728	25664704
Ebright et al. CTCs	Chr 1-region4	2	RHD	Chr 1	25598884	25656936
Ebright et al. CTCs	Chr 1-region4	2	TMEM50A	Chr 1	25664408	25688852
Ebright et al. CTCs	Chr 1-region4	2	RHCE	Chr 1	25688740	25756683
Ebright et al. CTCs	Chr 1-region4	2	TMEM57	Chr 1	25757388	25826700
Ebright et al. CTCs	Chr 1-region4	2	LDLRAP1	Chr 1	25870071	25895377
Ebright et al. CTCs	Chr 1-region4	2	MAN1C1	Chr 1	25943959	26112698
Ebright et al. CTCs	Chr 1-region4	2	SEPN1	Chr 1	26126667	26144713
Ebright et al. CTCs	Chr 1-region4	2	MTFR1L	Chr 1	26145131	26159432
Ebright et al. CTCs	Chr 1-region4	2	AUNIP	Chr 1	26158414	26185903
Ebright et al. CTCs	Chr 1-region4	2	PAQR7	Chr 1	26187701	26197744
Ebright et al. CTCs	Chr 1-region4	2	STMN1	Chr 1	26210672	26233482
Ebright et al. CTCs	Chr 1-region4	2	PAFAH2	Chr 1	26286258	26324648
Ebright et al. CTCs	Chr 1-region4	2	PDIK1L	Chr 1	26437664	26452034
Ebright et al. CTCs	Chr 1-region4	2	ZNF593	Chr 1	26496362	26498551
Ebright et al. CTCs	Chr 1-region4	2	CNKSR1	Chr 1	26503894	26516377
Ebright et al. CTCs	Chr 1-region4	2	SH3BGRL3	Chr 1	26605667	26608007
Ebright et al. CTCs	Chr 1-region4	2	UBXN11	Chr 1	26607819	26644854
Ebright et al. CTCs	Chr 1-region4	2	CD52	Chr 1	26644448	26647014
Ebright et al. CTCs	Chr 1-region4	2	LIN28A	Chr 1	26737269	26756213
Ebright et al. CTCs	Chr 1-region4	2	DHDDS	Chr 1	26758773	26797785
Ebright et al. CTCs	Chr 1-region4	2	HMGN2	Chr 1	26798941	26802463
Ebright et al. CTCs	Chr 1-region4	2	RPS6KA1	Chr 1	26856252	26901521
Ebright et al. CTCs	Chr 1-region4	2	ARID1A	Chr 1	27022524	27108595
Ebright et al. CTCs	Chr 1-region4	2	PIGV	Chr 1	27113963	27124889
Ebright et al. CTCs	Chr 1-region4	2	ZDHHC18	Chr 1	27153201	27184093
Ebright et al. CTCs	Chr 1-region4	2	SFN	Chr 1	27189633	27190947
Ebright et al. CTCs	Chr 1-region4	2	GPN2	Chr 1	27202624	27216788
Ebright et al. CTCs	Chr 1-region4	2	GPATCH3	Chr 1	27216979	27226957
Ebright et al. CTCs	Chr 1-region4	2	NUDC	Chr 1	27226729	27273353
Ebright et al. CTCs	Chr 1-region4	2	C1orf172	Chr 1	27276053	27286897
Ebright et al. CTCs	Chr 1-region4	2	FAM46B	Chr 1	27331511	27339327
Ebright et al. CTCs	Chr 1-region4	2	SLC9A1	Chr 1	27425306	27493472
Ebright et al. CTCs	Chr 1-region4	2	WDTC1	Chr 1	27561007	27635110
Ebright et al. CTCs	Chr 1-region4	2	TMEM222	Chr 1	27648651	27662891
Ebright et al. CTCs	Chr 1-region4	2	SYTL1	Chr 1	27668513	27680421
Ebright et al. CTCs	Chr 1-region4	2	MAP3K6	Chr 1	27681675	27693383
Ebright et al. CTCs	Chr 1-region4	2	WASF2	Chr 1	27730730	27816669
Ebright et al. CTCs	Chr 1-region4	2	AHDC1	Chr 1	27860546	27930942
Ebright et al. CTCs	Chr 1-region4	2	FGR	Chr 1	27938575	27961788
Ebright et al. CTCs	Chr 1-region4	2	IFI6	Chr 1	27992572	27998729
Ebright et al. CTCs	Chr 1-region4	2	STX12	Chr 1	28099694	28150963
Ebright et al. CTCs	Chr 1-region4	2	PPP1R8	Chr 1	28157289	28178187
Ebright et al. CTCs	Chr 1-region4	2	THEMIS2	Chr 1	28199055	28213196
Ebright et al. CTCs	Chr 1-region4	2	RPA2	Chr 1	28218035	28241257
Ebright et al. CTCs	Chr 1-region4	2	XKR8	Chr 1	28285973	28294607
Ebright et al. CTCs	Chr 1-region4	2	EYA3	Chr 1	28296855	28415207
Ebright et al. CTCs	Chr 1-region4	2	PTAFR	Chr 1	28473677	28520447
Ebright et al. CTCs	Chr 1-region4	2	DNAJC8	Chr 1	28525967	28559536
Ebright et al. CTCs	Chr 1-region4	2	ATPIF1	Chr 1	28562620	28573417
Ebright et al. CTCs	Chr 1-region4	2	SESN2	Chr 1	28586038	28609002
Ebright et al. CTCs	Chr 1-region4	2	MED18	Chr 1	28655513	28662476
Ebright et al. CTCs	Chr 1-region4	2	PHACTR4	Chr 1	28696114	28826881
Ebright et al. CTCs	Chr 1-region4	2	TRNAU1AP	Chr 1	28879597	28905051
Ebright et al. CTCs	Chr 1-region4	2	SNHG12	Chr 1	28905050	28909495
Ebright et al. CTCs	Chr 1-region4	2	TAF12	Chr 1	28915835	28969597
Ebright et al. CTCs	Chr 1-region4	2	GMEB1	Chr 1	28995244	29045865
Ebright et al. CTCs	Chr 1-region4	2	YTHDF2	Chr 1	29063133	29096287
Ebright et al. CTCs	Chr 1-region4	2	EPB41	Chr 1	29213603	29446553
Ebright et al. CTCs	Chr 1-region4	2	TMEM200B	Chr 1	29445940	29450447
Ebright et al. CTCs	Chr 1-region4	2	SRSF4	Chr 1	29474255	29508499
Ebright et al. CTCs	Chr 1-region4	2	LAPTM5	Chr 1	31205316	31230667
Ebright et al. CTCs	Chr 1-region4	2	PUM1	Chr 1	31404353	31538838
Ebright et al. CTCs	Chr 1-region4	2	ZCCHC17	Chr 1	31769842	31837783
Ebright et al. CTCs	Chr 1-region4	2	SERINC2	Chr 1	31882412	31907525
Ebright et al. CTCs	Chr 1-region6	3	ATP6V0B	Chr 1	44440159	44443967
Ebright et al. CTCs	Chr 1-region6	3	B4GALT2	Chr 1	44444615	44456840
Ebright et al. CTCs	Chr 1-region6	3	CCDC24	Chr 1	44457031	44462200
Ebright et al. CTCs	Chr 1-region6	3	SLC6A9	Chr 1	44457172	44497139
Ebright et al. CTCs	Chr 1-region6	3	DMAP1	Chr 1	44679127	44686353
Ebright et al. CTCs	Chr 1-region6	3	ERI3	Chr 1	44686742	44820932
Ebright et al. CTCs	Chr 1-region6	3	RNF220	Chr 1	44870866	45117396
Ebright et al. CTCs	Chr 1-region6	3	TMEM53	Chr 1	45100910	45140227
Ebright et al. CTCs	Chr 1-region6	3	C1orf228	Chr 1	45140364	45191263
Ebright et al. CTCs	Chr 1-region6	3	KIF2C	Chr 1	45205490	45233439
Ebright et al. CTCs	Chr 1-region6	3	RPS8	Chr 1	45240923	45244451
Ebright et al. CTCs	Chr 1-region6	3	PLK3	Chr 1	45265897	45271662
Ebright et al. CTCs	Chr 1-region6	3	BTBD19	Chr 1	45274154	45281257
Ebright et al. CTCs	Chr 1-region6	3	EIF2B3	Chr 1	45316450	45452282
Ebright et al. CTCs	Chr 1-region6	3	HECTD3	Chr 1	45468212	45477001
Ebright et al. CTCs	Chr 1-region6	3	UROD	Chr 1	45477819	45481247
Ebright et al. CTCs	Chr 1-region6	3	HPDL	Chr 1	45792545	45794347
Ebright et al. CTCs	Chr 1-region6	3	MUTYH	Chr 1	45794835	45806142
Ebright et al. CTCs	Chr 1-region6	3	TOE1	Chr 1	45805342	45809647
Ebright et al. CTCs	Chr 1-region6	3	TESK2	Chr 1	45809555	45956872
Ebright et al. CTCs	Chr 1-region6	3	MMACHC	Chr 1	45965725	45976739
Ebright et al. CTCs	Chr 1-region6	3	PRDX1	Chr 1	45976708	45988719
Ebright et al. CTCs	Chr 1-region6	3	AKR1A1	Chr 1	46016215	46035721
Ebright et al. CTCs	Chr 1-region6	3	NASP	Chr 1	46049518	46084566
Ebright et al. CTCs	Chr 1-region6	3	CCDC17	Chr 1	46085716	46089729
Ebright et al. CTCs	Chr 1-region6	3	GPBP1L1	Chr 1	46092976	46153785
Ebright et al. CTCs	Chr 1-region6	3	IPP	Chr 1	46159996	46216322
Ebright et al. CTCs	Chr 1-region6	3	MAST2	Chr 1	46252659	46501796
Ebright et al. CTCs	Chr 1-region6	3	PIK3R3	Chr 1	46505812	46642160
Ebright et al. CTCs	Chr 1-region6	3	TSPAN1	Chr 1	46640745	46651630
Ebright et al. CTCs	Chr 1-region6	3	POMGNT1	Chr 1	46654354	46685977
Ebright et al. CTCs	Chr 1-region6	3	LRRC41	Chr 1	46726868	46769280
Ebright et al. CTCs	Chr 1-region6	3	UQCRH	Chr 1	46769303	46782448
Ebright et al. CTCs	Chr 1-region6	3	NSUN4	Chr 1	46805849	46830824
Ebright et al. CTCs	Chr 1-region6	3	FAAH	Chr 1	46859937	46879520
Ebright et al. CTCs	Chr 1-region6	3	MKNK1	Chr 1	47023090	47082515
Ebright et al. CTCs	Chr 1-region6	3	MOB3C	Chr 1	47073387	47082563
Ebright et al. CTCs	Chr 1-region6	3	ATPAF1	Chr 1	47098409	47139539
Ebright et al. CTCs	Chr 1-region6	3	EFCAB14	Chr 1	47124366	47184824
Ebright et al. CTCs	Chr 1-region6	3	CYP4B1	Chr 1	47223510	47285085
Ebright et al. CTCs	Chr 1-region6	3	CYP4X1	Chr 1	47427036	47516423
Ebright et al. CTCs	Chr 1-region6	3	LINC00853	Chr 1	47644922	47646011
Ebright et al. CTCs	Chr 1-region6	3	PDZK1IP1	Chr 1	47649265	47656716
Ebright et al. CTCs	Chr 1-region6	3	TAL1	Chr 1	47681962	47697892
Ebright et al. CTCs	Chr 1-region6	3	STIL	Chr 1	47715811	47779819
Ebright et al. CTCs	Chr 1-region6	3	CMPK1	Chr 1	47799469	47844511
Ebright et al. CTCs	Chr 1-region6	3	FAF1	Chr 1	50905150	51425935
Ebright et al. CTCs	Chr 1-region6	3	CDKN2C	Chr 1	51426417	51440305
Ebright et al. CTCs	Chr 1-region6	3	RNF11	Chr 1	51701943	51739127
Ebright et al. CTCs	Chr 1-region6	3	TTC39A	Chr 1	51752930	51810788
Ebright et al. CTCs	Chr 1-region6	3	EPS15	Chr 1	51819935	51985000
Ebright et al. CTCs	Chr 1-region6	3	OSBPL9	Chr 1	52042851	52254889
Ebright et al. CTCs	Chr 1-region6	3	NRD1	Chr 1	52254863	52344477
Ebright et al. CTCs	Chr 1-region6	3	RAB3B	Chr 1	52373628	52456436
Ebright et al. CTCs	Chr 1-region6	3	TXNDC12	Chr 1	52485803	52521843
Ebright et al. CTCs	Chr 1-region6	3	KTI12	Chr 1	52497775	52499488
Ebright et al. CTCs	Chr 1-region6	3	BTF3L4	Chr 1	52521797	52556388
Ebright et al. CTCs	Chr 1-region6	3	ZFYVE9	Chr 1	52608046	52812358
Ebright et al. CTCs	Chr 1-region6	3	CC2D1B	Chr 1	52811395	52831865
Ebright et al. CTCs	Chr 1-region6	3	PRPF38A	Chr 1	52870236	52886511
Ebright et al. CTCs	Chr 1-region6	3	ZCCHC11	Chr 1	52873954	53019159
Ebright et al. CTCs	Chr 1-region6	3	GPX7	Chr 1	53068044	53074723
Ebright et al. CTCs	Chr 1-region6	3	ZYG11B	Chr 1	53192126	53293014
Ebright et al. CTCs	Chr 1-region6	3	ZYG11A	Chr 1	53308183	53360670
Ebright et al. CTCs	Chr 1-region6	3	ECHDC2	Chr 1	53361656	53392884
Ebright et al. CTCs	Chr 1-region6	3	SCP2	Chr 1	53392901	53517375
Ebright et al. CTCs	Chr 1-region6	3	CPT2	Chr 1	53662101	53679869
Ebright et al. CTCs	Chr 1-region8	2	PIGK	Chr 1	77554675	77685115
Ebright et al. CTCs	Chr 1-region8	2	ZZZ3	Chr 1	78028101	78149104
Ebright et al. CTCs	Chr 1-region8	2	USP33	Chr 1	78161672	78225537
Ebright et al. CTCs	Chr 1-region8	2	FAM73A	Chr 1	78245309	78344106
Ebright et al. CTCs	Chr 1-region8	2	NEXN	Chr 1	78354198	78409580
Ebright et al. CTCs	Chr 1-region8	2	FUBP1	Chr 1	78409740	78444794
Ebright et al. CTCs	Chr 1-region8	2	DNAJB4	Chr 1	78444859	78483648
Ebright et al. CTCs	Chr 1-region8	2	IFI44L	Chr 1	79085607	79111830
Ebright et al. CTCs	Chr 1-region8	2	IFI44	Chr 1	79115481	79129763
Ebright et al. CTCs	Chr 1-region8	2	TTLL7	Chr 1	84330711	84464833
Ebright et al. CTCs	Chr 1-region8	2	PRKACB	Chr 1	84543745	84704181
Ebright et al. CTCs	Chr 1-region8	2	RPF1	Chr 1	84944942	84963473
Ebright et al. CTCs	Chr 1-region8	2	GNG5	Chr 1	84964008	84972248
Ebright et al. CTCs	Chr 1-region8	2	CTBS	Chr 1	85015289	85040163
Ebright et al. CTCs	Chr 1-region8	2	SSX2IP	Chr 1	85109390	85156486
Ebright et al. CTCs	Chr 1-region8	2	C1orf52	Chr 1	85715639	85725355
Ebright et al. CTCs	Chr 1-region8	2	DDAH1	Chr 1	85784164	86043933
Ebright et al. CTCs	Chr 1-region8	2	CYR61	Chr 1	86046444	86049645
Ebright et al. CTCs	Chr 1-region8	2	ZNHIT6	Chr 1	86115106	86174116
Ebright et al. CTCs	Chr 1-region8	2	COL24A1	Chr 1	86194916	86622626
Ebright et al. CTCs	Chr 1-region8	2	ODF2L	Chr 1	86814344	86862023
Ebright et al. CTCs	Chr 1-region8	2	SH3GLB1	Chr 1	87170259	87213867
Ebright et al. CTCs	Chr 1-region8	2	SEP15	Chr 1	87328132	87380107
Ebright et al. CTCs	Chr 1-region8	2	HS2ST1	Chr 1	87380331	87602334
Ebright et al. CTCs	Chr 1-region8	2	LMO4	Chr 1	87794151	87814606
Ebright et al. CTCs	Chr 1-region8	2	PKN2	Chr 1	89149905	89301938
Ebright et al. CTCs	Chr 1-region8	2	GTF2B	Chr 1	89318615	89357627
Ebright et al. CTCs	Chr 1-region8	2	CCBL2	Chr 1	89401456	89458636
Ebright et al. CTCs	Chr 1-region8	2	RBMXL1	Chr 1	89445139	89458643
Ebright et al. CTCs	Chr 1-region8	2	GBP3	Chr 1	89472349	89488577
Ebright et al. CTCs	Chr 1-region8	2	GBP1	Chr 1	89518002	89531043
Ebright et al. CTCs	Chr 1-region8	2	GBP2	Chr 1	89571815	89616139
Ebright et al. CTCs	Chr 1-region8	2	GBP4	Chr 1	89646831	89664615
Ebright et al. CTCs	Chr 1-region8	2	GBP5	Chr 1	89724633	89738544
Ebright et al. CTCs	Chr 1-region8	2	GBP6	Chr 1	89829617	89852020
Ebright et al. CTCs	Chr 1-region8	2	LRRC8B	Chr 1	89990395	90063423
Ebright et al. CTCs	Chr 1-region8	2	LRRC8C	Chr 1	90098631	90235462
Ebright et al. CTCs	Chr 1-region8	2	LRRC8D	Chr 1	90286573	90402170
Ebright et al. CTCs	Chr 1-region8	2	ZNF326	Chr 1	90460671	90501090
Ebright et al. CTCs	Chr 1-region8	2	ZNF644	Chr 1	91380859	91487829
Ebright et al. CTCs	Chr 1-region8	2	TGFBR3	Chr 1	92145902	92371892
Ebright et al. CTCs	Chr 1-region8	2	RPAP2	Chr 1	92764522	92867613
Ebright et al. CTCs	Chr 1-region8	2	GFI1	Chr 1	92940319	92952433
Ebright et al. CTCs	Chr 1-region8	2	EVI5	Chr 1	92974253	93257961
Ebright et al. CTCs	Chr 1-region8	2	RPL5	Chr 1	93297582	93307481
Ebright et al. CTCs	Chr 1-region8	2	MTF2	Chr 1	93544792	93604638
Ebright et al. CTCs	Chr 1-region8	2	TMED5	Chr 1	93615299	93646285
Ebright et al. CTCs	Chr 1-region8	2	CCDC18	Chr 1	93645476	93744287
Ebright et al. CTCs	Chr 1-region8	2	DR1	Chr 1	93811445	93835055
Ebright et al. CTCs	Chr 1-region8	2	FNBP1L	Chr 1	93913688	94020218
Ebright et al. CTCs	Chr 1-region8	2	BCAR3	Chr 1	94027347	94312706
Ebright et al. CTCs	Chr 1-region8	2	DNTTIP2	Chr 1	94333373	94345474
Ebright et al. CTCs	Chr 1-region8	2	GCLM	Chr 1	94350761	94374966
Ebright et al. CTCs	Chr 1-region8	2	ARHGAP29	Chr 1	94614544	94740624
Ebright et al. CTCs	Chr 1-region8	2	ABCD3	Chr 1	94883933	94984222
Ebright et al. CTCs	Chr 1-region8	2	LINC01057	Chr 1	95104017	95285837
Ebright et al. CTCs	Chr 1-region8	2	ALG14	Chr 1	95439963	95538501
Ebright et al. CTCs	Chr 1-region8	2	TMEM56	Chr 1	95582894	95663163
Ebright et al. CTCs	Chr 1-region8	2	RWDD3	Chr 1	95699711	95712781
Ebright et al. CTCs	Chr 1-region8	2	PTBP2	Chr 1	97187221	97289294
Ebright et al. CTCs	Chr 1-region8	2	AGL	Chr 1	100315640	100389579
Ebright et al. CTCs	Chr 1-region8	2	SLC35A3	Chr 1	100435345	100492535
Ebright et al. CTCs	Chr 1-region8	2	HIAT1	Chr 1	100503653	100548933
Ebright et al. CTCs	Chr 1-region8	2	DBT	Chr 1	100652475	100715390
Ebright et al. CTCs	Chr 1-region8	2	RTCA	Chr 1	100731763	100758325
Ebright et al. CTCs	Chr 1-region8	2	EXTL2	Chr 1	101337943	101361554
Ebright et al. CTCs	Chr 1-region8	2	SLC30A7	Chr 1	101361632	101447309
Ebright et al. CTCs	Chr 1-region8	2	DPH5	Chr 1	101455179	101491644
Ebright et al. CTCs	Chr 1-region8	2	AC093157.1	Chr 1	101455761	101457653
Ebright et al. CTCs	Chr 1-region8	2	S1PR1	Chr 1	101702444	101707074
Ebright et al. CTCs	Chr 1-region8	2	RNPC3	Chr 1	104068313	104097861
Ebright et al. CTCs	Chr 1-region8	2	AMY2B	Chr 1	104096437	104122156
Ebright et al. CTCs	Chr 1-region8	2	AMY2A	Chr 1	104159999	104168402
Ebright et al. CTCs	Chr 1-region8	2	VAV3	Chr 1	108113782	108507766
Ebright et al. CTCs	Chr 1-region8	2	HENMT1	Chr 1	109190912	109204148
Ebright et al. CTCs	Chr 1-region8	2	PRPF38B	Chr 1	109234945	109244425
Ebright et al. CTCs	Chr 1-region8	2	STXBP3	Chr 1	109289296	109352148
Ebright et al. CTCs	Chr 1-region8	2	GPSM2	Chr 1	109417972	109477167
Ebright et al. CTCs	Chr 1-region8	2	CLCC1	Chr 1	109472130	109506111
Ebright et al. CTCs	Chr 1-region8	2	WDR47	Chr 1	109512836	109584850
Ebright et al. CTCs	Chr 1-region8	2	TAF13	Chr 1	109605108	109618624
Ebright et al. CTCs	Chr 1-region8	2	TMEM167B	Chr 1	109632425	109639556
Ebright et al. CTCs	Chr 1-region8	2	KIAA1324	Chr 1	109656301	109749401
Ebright et al. CTCs	Chr 1-region8	2	SARS	Chr 1	109756540	109780791
Ebright et al. CTCs	Chr 1-region8	2	CELSR2	Chr 1	109792641	109818372
Ebright et al. CTCs	Chr 1-region8	2	PSRC1	Chr 1	109822178	109825808
Ebright et al. CTCs	Chr 1-region8	2	SORT1	Chr 1	109852192	109940573
Ebright et al. CTCs	Chr 1-region8	2	PSMA5	Chr 1	109941653	109969062
Ebright et al. CTCs	Chr 1-region8	2	CYB561D1	Chr 1	110036674	110045554
Ebright et al. CTCs	Chr 1-region8	2	AMIGO1	Chr 1	110046797	110052360
Ebright et al. CTCs	Chr 1-region8	2	GNAI3	Chr 1	110091233	110136975
Ebright et al. CTCs	Chr 1-region8	2	AMPD2	Chr 1	110158726	110174673
Ebright et al. CTCs	Chr 1-region8	2	GSTM4	Chr 1	110198703	110208118
Ebright et al. CTCs	Chr 1-region8	2	GSTM2	Chr 1	110210644	110252171
Ebright et al. CTCs	Chr 1-region8	2	GSTM1	Chr 1	110230436	110251661
Ebright et al. CTCs	Chr 1-region8	2	GSTM3	Chr 1	110276554	110284384
Ebright et al. CTCs	Chr 1-region8	2	CSF1	Chr 1	110452864	110473614
Ebright et al. CTCs	Chr 1-region8	2	AHCYL1	Chr 1	110527308	110566357
Ebright et al. CTCs	Chr 1-region8	2	STRIP1	Chr 1	110574199	110617263
Ebright et al. CTCs	Chr 1-region8	2	KCNC4	Chr 1	110753965	110825722
Ebright et al. CTCs	Chr 1-region8	2	RBM15	Chr 1	110881128	110889299
Ebright et al. CTCs	Chr 1-region8	2	LAMTOR5	Chr 1	110943871	110950564
Ebright et al. CTCs	Chr 1-region8	2	KCNA3	Chr 1	111214310	111217655
Ebright et al. CTCs	Chr 1-region8	2	CD53	Chr 1	111415775	111442550
Ebright et al. CTCs	Chr 1-region8	2	LRIF1	Chr 1	111489807	111506701
Ebright et al. CTCs	Chr 1-region8	2	DRAM2	Chr 1	111659955	111682838
Ebright et al. CTCs	Chr 1-region8	2	CEPT1	Chr 1	111682249	111727724
Ebright et al. CTCs	Chr 1-region8	2	DENND2D	Chr 1	111729796	111747157
Ebright et al. CTCs	Chr 1-region8	2	OVGP1	Chr 1	111956936	111970399
Ebright et al. CTCs	Chr 1-region8	2	WDR77	Chr 1	111982512	111991998
Ebright et al. CTCs	Chr 1-region8	2	ATP5F1	Chr 1	111991486	112005395
Ebright et al. CTCs	Chr 1-region8	2	C1orf162	Chr 1	112016414	112021134
Ebright et al. CTCs	Chr 1-region8	2	ADORA3	Chr 1	112025970	112106584
Ebright et al. CTCs	Chr 1-region8	2	RAP1A	Chr 1	112084840	112259313
Ebright et al. CTCs	Chr 1-region8	2	FAM212B	Chr 1	112223252	112298446
Ebright et al. CTCs	Chr 1-region8	2	DDX20	Chr 1	112297867	112310638
Ebright et al. CTCs	Chr 1-region8	2	KCND3	Chr 1	112313284	112531777
Ebright et al. CTCs	Chr 1-region8	2	WNT2B	Chr 1	113009163	113072787
Ebright et al. CTCs	Chr 1-region8	2	CAPZA1	Chr 1	113161795	113214241
Ebright et al. CTCs	Chr 1-region8	2	MOV10	Chr 1	113215763	113243368
Ebright et al. CTCs	Chr 1-region8	2	RHOC	Chr 1	113243728	113250056
Ebright et al. CTCs	Chr 1-region8	2	PPM1J	Chr 1	113252616	113258099
Ebright et al. CTCs	Chr 1-region8	2	SLC16A1	Chr 1	113454469	113499635
Ebright et al. CTCs	Chr 1-region8	2	LRIG2	Chr 1	113615831	113674882
Ebright et al. CTCs	Chr 1-region8	2	PHTF1	Chr 1	114239453	114302111
Ebright et al. CTCs	Chr 1-region8	2	RSBN1	Chr 1	114304454	114355098
Ebright et al. CTCs	Chr 1-region8	2	BCL2L15	Chr 1	114420790	114430169
Ebright et al. CTCs	Chr 1-region10	2	C1orf56	Chr 1	151020216	151024462
Ebright et al. CTCs	Chr 1-region10	2	CDC42SE1	Chr 1	151023447	151042801
Ebright et al. CTCs	Chr 1-region10	2	MLLT11	Chr 1	151030234	151040970
Ebright et al. CTCs	Chr 1-region10	2	GABPB2	Chr 1	151043054	151098018
Ebright et al. CTCs	Chr 1-region10	2	SCNM1	Chr 1	151129140	151142773
Ebright et al. CTCs	Chr 1-region10	2	VPS72	Chr 1	151142463	151167797
Ebright et al. CTCs	Chr 1-region10	2	PSMD4	Chr 1	151227179	151239955
Ebright et al. CTCs	Chr 1-region10	2	ZNF687	Chr 1	151254094	151264656
Ebright et al. CTCs	Chr 1-region10	2	PI4KB	Chr 1	151264273	151300191
Ebright et al. CTCs	Chr 1-region10	2	RFX5	Chr 1	151313116	151319833
Ebright et al. CTCs	Chr 1-region10	2	SELENBP1	Chr 1	151336778	151345209
Ebright et al. CTCs	Chr 1-region10	2	PSMB4	Chr 1	151372010	151374420
Ebright et al. CTCs	Chr 1-region10	2	POGZ	Chr 1	151375200	151431941
Ebright et al. CTCs	Chr 1-region10	2	CGN	Chr 1	151482986	151511168
Ebright et al. CTCs	Chr 1-region10	2	TUFT1	Chr 1	151512781	151556059
Ebright et al. CTCs	Chr 1-region10	2	SNX27	Chr 1	151584541	151671567
Ebright et al. CTCs	Chr 1-region10	2	MRPL9	Chr 1	151732119	151736040
Ebright et al. CTCs	Chr 1-region10	2	OAZ3	Chr 1	151735445	151743808
Ebright et al. CTCs	Chr 1-region10	2	TDRKH	Chr 1	151742583	151763892
Ebright et al. CTCs	Chr 1-region10	2	RORC	Chr 1	151778547	151804348
Ebright et al. CTCs	Chr 1-region10	2	THEM5	Chr 1	151819739	151826173
Ebright et al. CTCs	Chr 1-region10	2	THEM4	Chr 1	151846060	151882284
Ebright et al. CTCs	Chr 1-region10	2	S100A10	Chr 1	151955391	151966866
Ebright et al. CTCs	Chr 1-region10	2	S100A11	Chr 1	152004982	152020383
Ebright et al. CTCs	Chr 1-region10	2	KPRP	Chr 1	152730506	152734529
Ebright et al. CTCs	Chr 1-region10	2	S100A9	Chr 1	153330330	153333503
Ebright et al. CTCs	Chr 1-region10	2	S100A12	Chr 1	153346184	153348125
Ebright et al. CTCs	Chr 1-region10	2	S100A8	Chr 1	153362508	153363664
Ebright et al. CTCs	Chr 1-region10	2	S100A6	Chr 1	153507075	153508720
Ebright et al. CTCs	Chr 1-region10	2	S100A4	Chr 1	153516089	153522612
Ebright et al. CTCs	Chr 1-region10	2	S100A16	Chr 1	153579362	153585621
Ebright et al. CTCs	Chr 1-region10	2	S100A14	Chr 1	153586731	153589462
Ebright et al. CTCs	Chr 1-region10	2	S100A13	Chr 1	153591263	153606568
Ebright et al. CTCs	Chr 1-region10	2	S100A1	Chr 1	153600402	153604513
Ebright et al. CTCs	Chr 1-region10	2	CHTOP	Chr 1	153606525	153618782
Ebright et al. CTCs	Chr 1-region10	2	ILF2	Chr 1	153634512	153643524
Ebright et al. CTCs	Chr 1-region10	2	INTS3	Chr 1	153700543	153746555
Ebright et al. CTCs	Chr 1-region10	2	SLC27A3	Chr 1	153746830	153752633
Ebright et al. CTCs	Chr 1-region10	2	GATAD2B	Chr 1	153777201	153895451
Ebright et al. CTCs	Chr 1-region16	3	DESI2	Chr 1	244816237	244872335
Ebright et al. CTCs	Chr 1-region16	3	COX20	Chr 1	244998624	245008359
Ebright et al. CTCs	Chr 1-region16	3	HNRNPU	Chr 1	245014468	245027844
Ebright et al. CTCs	Chr 1-region16	3	EFCAB2	Chr 1	245133007	245290466
Ebright et al. CTCs	Chr 1-region16	3	KIF26B	Chr 1	245318287	245872733
Ebright et al. CTCs	Chr 1-region16	3	SMYD3	Chr 1	245912642	246670614
Ebright et al. CTCs	Chr 1-region16	3	TFB2M	Chr 1	246703862	246729626
Ebright et al. CTCs	Chr 1-region16	3	CNST	Chr 1	246729746	246831886
Ebright et al. CTCs	Chr 1-region16	3	SCCPDH	Chr 1	246887349	246931439
Ebright et al. CTCs	Chr 1-region16	3	AHCTF1	Chr 1	247002400	247095280
Ebright et al. CTCs	Chr 1-region16	3	ZNF670	Chr 1	247108849	247242113
Ebright et al. CTCs	Chr 1-region16	3	ZNF669	Chr 1	247263264	247267674
Ebright et al. CTCs	Chr 1-region16	3	ZNF124	Chr 1	247285277	247335318
Ebright et al. CTCs	Chr 1-region16	3	ZNF496	Chr 1	247460714	247495148
Ebright et al. CTCs	Chr 1-region16	3	GCSAML	Chr 1	247670360	247740992
Ebright et al. CTCs	Chr 1-region16	3	TRIM58	Chr 1	248020501	248041507
Ebright et al. CTCs	Chr 1-region16	3	OR2W3	Chr 1	248031277	248060449
Ebright et al. CTCs	Chr 1-region16	3	ZNF672	Chr 1	249132409	249143716
Ebright et al. CTCs	Chr 1-region16	3	ZNF692	Chr 1	249144205	249153343
Ebright et al. CTCs	Chr 2-region17	3	SH3YL1	Chr 2	217730	266398
Ebright et al. CTCs	Chr 2-region17	3	ACP1	Chr 2	264140	278283
Ebright et al. CTCs	Chr 2-region17	3	FAM150B	Chr 2	279558	288851
Ebright et al. CTCs	Chr 2-region17	3	TMEM18	Chr 2	667335	677439
Ebright et al. CTCs	Chr 2-region17	3	AC092159.2	Chr 2	677186	697371
Ebright et al. CTCs	Chr 2-region17	3	AC144450.2	Chr 2	1624282	1629191
Ebright et al. CTCs	Chr 2-region17	3	PXDN	Chr 2	1635659	1748624
Ebright et al. CTCs	Chr 2-region17	3	MYT1L	Chr 2	1792885	2335032
Ebright et al. CTCs	Chr 2-region17	3	TSSC1	Chr 2	3192696	3381653
Ebright et al. CTCs	Chr 2-region17	3	TRAPPC12	Chr 2	3383446	3488865
Ebright et al. CTCs	Chr 2-region17	3	ADI1	Chr 2	3501132	3523507
Ebright et al. CTCs	Chr 2-region17	3	AC108488.4	Chr 2	3579403	3584463
Ebright et al. CTCs	Chr 2-region17	3	RNASEH1	Chr 2	3592383	3606206
Ebright et al. CTCs	Chr 2-region17	3	RPS7	Chr 2	3622795	3628509
Ebright et al. CTCs	Chr 2-region17	3	CMPK2	Chr 2	6980701	7006766
Ebright et al. CTCs	Chr 2-region17	3	RSAD2	Chr 2	7005937	7038370
Ebright et al. CTCs	Chr 2-region17	3	RNF144A	Chr 2	7057523	7208417
Ebright et al. CTCs	Chr 2-region17	3	AC011747.4	Chr 2	8699963	8723922
Ebright et al. CTCs	Chr 2-region17	3	ID2	Chr 2	8818975	8824583
Ebright et al. CTCs	Chr 2-region17	3	KIDINS220	Chr 2	8865408	8977760
Ebright et al. CTCs	Chr 2-region17	3	MBOAT2	Chr 2	8992820	9143942
Ebright et al. CTCs	Chr 2-region17	3	ASAP2	Chr 2	9346894	9545812
Ebright et al. CTCs	Chr 2-region17	3	ITGB1BP1	Chr 2	9543604	9563676
Ebright et al. CTCs	Chr 2-region17	3	CPSF3	Chr 2	9563697	9613230
Ebright et al. CTCs	Chr 2-region17	3	IAH1	Chr 2	9613787	9636672
Ebright et al. CTCs	Chr 2-region17	3	YWHAQ	Chr 2	9724101	9771143
Ebright et al. CTCs	Chr 2-region17	3	TAF1B	Chr 2	9983483	10074545
Ebright et al. CTCs	Chr 2-region17	3	GRHL1	Chr 2	10085341	10142411
Ebright et al. CTCs	Chr 2-region17	3	KLF11	Chr 2	10182976	10194963
Ebright et al. CTCs	Chr 2-region17	3	RRM2	Chr 2	10262455	10271545
Ebright et al. CTCs	Chr 2-region17	3	HPCAL1	Chr 2	10443015	10567743
Ebright et al. CTCs	Chr 2-region17	3	ODC1	Chr 2	10580094	10588630
Ebright et al. CTCs	Chr 2-region17	3	NOL10	Chr 2	10710892	10830101
Ebright et al. CTCs	Chr 2-region17	3	PDIA6	Chr 2	10923517	10978103
Ebright et al. CTCs	Chr 2-region17	3	KCNF1	Chr 2	11052063	11054350
Ebright et al. CTCs	Chr 2-region17	3	C2orf50	Chr 2	11273179	11286916
Ebright et al. CTCs	Chr 2-region17	3	PQLC3	Chr 2	11295324	11319000
Ebright et al. CTCs	Chr 2-region17	3	ROCK2	Chr 2	11319887	11488456
Ebright et al. CTCs	Chr 2-region17	3	E2F6	Chr 2	11584501	11606297
Ebright et al. CTCs	Chr 2-region17	3	GREB1	Chr 2	11674242	11782914
Ebright et al. CTCs	Chr 2-region17	3	LPIN1	Chr 2	11817721	11967535
Ebright et al. CTCs	Chr 2-region17	3	TRIB2	Chr 2	12857015	12882860
Ebright et al. CTCs	Chr 2-region17	3	FAM84A	Chr 2	14772810	14790933
Ebright et al. CTCs	Chr 2-region17	3	NBAS	Chr 2	15307032	15701454
Ebright et al. CTCs	Chr 2-region17	3	DDX1	Chr 2	15731302	15771235
Ebright et al. CTCs	Chr 2-region17	3	MYCN	Chr 2	16080686	16087129
Ebright et al. CTCs	Chr 2-region17	3	FAM49A	Chr 2	16730727	16847599
Ebright et al. CTCs	Chr 2-region17	3	VSNL1	Chr 2	17720393	17838285
Ebright et al. CTCs	Chr 2-region17	3	SMC6	Chr 2	17845079	17981509
Ebright et al. CTCs	Chr 2-region17	3	GEN1	Chr 2	17935125	17966632
Ebright et al. CTCs	Chr 2-region17	3	KCNS3	Chr 2	18059114	18542882
Ebright et al. CTCs	Chr 2-region17	3	LINC00954	Chr 2	20068621	20084808
Ebright et al. CTCs	Chr 2-region17	3	LAPTM4A	Chr 2	20232411	20251789
Ebright et al. CTCs	Chr 2-region17	3	SDC1	Chr 2	20400558	20425194
Ebright et al. CTCs	Chr 2-region17	3	PUM2	Chr 2	20448452	20551995
Ebright et al. CTCs	Chr 2-region17	3	RHOB	Chr 2	20646835	20649200
Ebright et al. CTCs	Chr 2-region19	4	LANCL1	Chr 2	211295973	211342376
Ebright et al. CTCs	Chr 2-region19	4	CPS1	Chr 2	211342406	211543831
Ebright et al. CTCs	Chr 2-region19	4	ERBB4	Chr 2	212240446	213403565
Ebright et al. CTCs	Chr 2-region19	4	AC079610.2	Chr 2	214141276	214148929
Ebright et al. CTCs	Chr 2-region19	4	SPAG16	Chr 2	214149113	215275225
Ebright et al. CTCs	Chr 2-region19	4	BARD1	Chr 2	215590370	215674428
Ebright et al. CTCs	Chr 2-region19	4	AC072062.1	Chr 2	215674953	215827998
Ebright et al. CTCs	Chr 2-region19	4	ATIC	Chr 2	216176540	216214487
Ebright et al. CTCs	Chr 2-region19	4	FN1	Chr 2	216225163	216300895
Ebright et al. CTCs	Chr 2-region19	4	MREG	Chr 2	216809213	216898819
Ebright et al. CTCs	Chr 2-region19	4	PECR	Chr 2	216861052	216947678
Ebright et al. CTCs	Chr 2-region19	4	XRCC5	Chr 2	216972187	217071026
Ebright et al. CTCs	Chr 2-region19	4	SMARCAL1	Chr 2	217277137	217347776
Ebright et al. CTCs	Chr 2-region19	4	RPL37A	Chr 2	217362912	217443903
Ebright et al. CTCs	Chr 2-region19	4	IGFBP2	Chr 2	217497551	217529159
Ebright et al. CTCs	Chr 2-region19	4	IGFBP5	Chr 2	217536828	217560248
Ebright et al. CTCs	Chr 2-region19	4	TNS1	Chr 2	218664512	218867718
Ebright et al. CTCs	Chr 2-region19	4	CXCR2	Chr 2	218990012	219001976
Ebright et al. CTCs	Chr 2-region19	4	ARPC2	Chr 2	219081817	219119079
Ebright et al. CTCs	Chr 2-region19	4	AAMP	Chr 2	219128850	219134980
Ebright et al. CTCs	Chr 2-region19	4	PNKD	Chr 2	219135115	219211516
Ebright et al. CTCs	Chr 2-region19	4	TMBIM1	Chr 2	219138915	219157309
Ebright et al. CTCs	Chr 2-region19	4	AC021016.8	Chr 2	219191612	219222689
Ebright et al. CTCs	Chr 2-region19	4	SLC11A1	Chr 2	219246752	219261617
Ebright et al. CTCs	Chr 2-region19	4	CTDSP1	Chr 2	219262979	219270664
Ebright et al. CTCs	Chr 2-region19	4	VIL1	Chr 2	219283815	219318018
Ebright et al. CTCs	Chr 2-region19	4	USP37	Chr 2	219314974	219433084
Ebright et al. CTCs	Chr 2-region19	4	RQCD1	Chr 2	219433303	219461803
Ebright et al. CTCs	Chr 2-region19	4	PLCD4	Chr 2	219472488	219501907
Ebright et al. CTCs	Chr 2-region19	4	ZNF142	Chr 2	219502639	219524378
Ebright et al. CTCs	Chr 2-region19	4	BCS1L	Chr 2	219523487	219528166
Ebright et al. CTCs	Chr 2-region19	4	STK36	Chr 2	219536749	219567439
Ebright et al. CTCs	Chr 2-region19	4	CYP27A1	Chr 2	219646472	219680016
Ebright et al. CTCs	Chr 2-region19	4	LINC00608	Chr 2	219840321	219844382
Ebright et al. CTCs	Chr 2-region19	4	CNPPD1	Chr 2	220036619	220042828
Ebright et al. CTCs	Chr 2-region19	4	FAM134A	Chr 2	220040947	220050201
Ebright et al. CTCs	Chr 2-region19	4	ZFAND2B	Chr 2	220059959	220074373
Ebright et al. CTCs	Chr 2-region19	4	ABCB6	Chr 2	220074490	220083712
Ebright et al. CTCs	Chr 2-region19	4	ATG9A	Chr 2	220074494	220094439
Ebright et al. CTCs	Chr 2-region19	4	ANKZF1	Chr 2	220094479	220101391
Ebright et al. CTCs	Chr 2-region19	4	GLB1L	Chr 2	220101328	220110200
Ebright et al. CTCs	Chr 2-region19	4	STK16	Chr 2	220110177	220115059
Ebright et al. CTCs	Chr 2-region19	4	TUBA4A	Chr 2	220114433	220142892
Ebright et al. CTCs	Chr 2-region19	4	DNAJB2	Chr 2	220143989	220151622
Ebright et al. CTCs	Chr 2-region19	4	PTPRN	Chr 2	220154345	220174370
Ebright et al. CTCs	Chr 2-region19	4	DNPEP	Chr 2	220238268	220264744
Ebright et al. CTCs	Chr 2-region19	4	SPEG	Chr 2	220299568	220363009
Ebright et al. CTCs	Chr 2-region19	4	GMPPA	Chr 2	220363589	220371710
Ebright et al. CTCs	Chr 2-region19	4	ASIC4	Chr 2	220378892	220403494
Ebright et al. CTCs	Chr 2-region19	4	CHPF	Chr 2	220403669	220408509
Ebright et al. CTCs	Chr 2-region19	4	OBSL1	Chr 2	220415451	220436581
Ebright et al. CTCs	Chr 2-region19	4	AC009502.4	Chr 2	220550103	220602659
Ebright et al. CTCs	Chr 2-region19	4	EPHA4	Chr 2	222282747	222438922
Ebright et al. CTCs	Chr 2-region19	4	SGPP2	Chr 2	223289236	223425667
Ebright et al. CTCs	Chr 2-region19	4	FARSB	Chr 2	223435255	223521056
Ebright et al. CTCs	Chr 2-region19	4	ACSL3	Chr 2	223725652	223809357
Ebright et al. CTCs	Chr 2-region19	4	KCNE4	Chr 2	223916532	224063117
Ebright et al. CTCs	Chr 2-region19	4	AP1S3	Chr 2	224616403	224702744
Ebright et al. CTCs	Chr 2-region19	4	WDFY1	Chr 2	224720433	224810104
Ebright et al. CTCs	Chr 2-region19	4	MRPL44	Chr 2	224822121	224832431
Ebright et al. CTCs	Chr 2-region19	4	SERPINE2	Chr 2	224839829	224904036
Ebright et al. CTCs	Chr 2-region19	4	FAM124B	Chr 2	225243415	225266802
Ebright et al. CTCs	Chr 2-region19	4	CUL3	Chr 2	225334867	225450110
Ebright et al. CTCs	Chr 2-region19	4	DOCK10	Chr 2	225629807	225907162
Ebright et al. CTCs	Chr 2-region19	4	IRS1	Chr 2	227596033	227664475
Ebright et al. CTCs	Chr 2-region19	4	RHBDD1	Chr 2	227700297	227863931
Ebright et al. CTCs	Chr 2-region19	4	MFF	Chr 2	228189867	228222550
Ebright et al. CTCs	Chr 2-region19	4	AGFG1	Chr 2	228336868	228425930
Ebright et al. CTCs	Chr 2-region19	4	SLC19A3	Chr 2	228549926	228582728
Ebright et al. CTCs	Chr 2-region19	4	TRIP12	Chr 2	230628554	230787955
Ebright et al. CTCs	Chr 2-region19	4	SLC16A14	Chr 2	230899698	230933715
Ebright et al. CTCs	Chr 2-region19	4	SP110	Chr 2	231032009	231090444
Ebright et al. CTCs	Chr 2-region19	4	SP140L	Chr 2	231191899	231268447
Ebright et al. CTCs	Chr 2-region19	4	SP100	Chr 2	231280657	231408805
Ebright et al. CTCs	Chr 2-region19	4	AC098823.3	Chr 2	231555636	231565244
Ebright et al. CTCs	Chr 2-region19	4	CAB39	Chr 2	231577560	231685790
Ebright et al. CTCs	Chr 2-region19	4	ITM2C	Chr 2	231729354	231743963
Ebright et al. CTCs	Chr 2-region19	4	GPR55	Chr 2	231772033	231825781
Ebright et al. CTCs	Chr 2-region19	4	PSMD1	Chr 2	231921578	232037541
Ebright et al. CTCs	Chr 2-region19	4	ARMC9	Chr 2	232063260	232239548
Ebright et al. CTCs	Chr 2-region19	4	B3GNT7	Chr 2	232260254	232265875
Ebright et al. CTCs	Chr 2-region19	4	AC017104.2	Chr 2	232316906	232317864
Ebright et al. CTCs	Chr 2-region19	4	NCL	Chr 2	232318242	232348352
Ebright et al. CTCs	Chr 2-region19	4	PTMA	Chr 2	232571605	232578251
Ebright et al. CTCs	Chr 2-region19	4	PDE6D	Chr 2	232597135	232650982
Ebright et al. CTCs	Chr 2-region19	4	COPS7B	Chr 2	232646381	232673963
Ebright et al. CTCs	Chr 2-region19	4	DIS3L2	Chr 2	232825955	233209060
Ebright et al. CTCs	Chr 2-region19	4	TIGD1	Chr 2	233412779	233415226
Ebright et al. CTCs	Chr 2-region19	4	EIF4E2	Chr 2	233414762	233448354
Ebright et al. CTCs	Chr 2-region19	4	EFHD1	Chr 2	233470767	233547491
Ebright et al. CTCs	Chr 2-region19	4	GIGYF2	Chr 2	233562009	233725285
Ebright et al. CTCs	Chr 2-region19	4	INPP5D	Chr 2	233924677	234116549
Ebright et al. CTCs	Chr 2-region19	4	ATG16L1	Chr 2	234118697	234204320
Ebright et al. CTCs	Chr 2-region19	4	SAG	Chr 2	234216462	234255701
Ebright et al. CTCs	Chr 2-region19	4	DGKD	Chr 2	234263153	234380750
Ebright et al. CTCs	Chr 2-region19	4	USP40	Chr 2	234384166	234475428
Ebright et al. CTCs	Chr 2-region19	4	HJURP	Chr 2	234742062	234763212
Ebright et al. CTCs	Chr 2-region19	4	ARL4C	Chr 2	235401685	235405697
Ebright et al. CTCs	Chr 2-region19	4	SH3BP4	Chr 2	235860617	235964358
Ebright et al. CTCs	Chr 2-region19	4	AGAP1	Chr 2	236402733	237040444
Ebright et al. CTCs	Chr 2-region19	4	ASB18	Chr 2	237102095	237173052
Ebright et al. CTCs	Chr 2-region19	4	AC105760.2	Chr 2	237968077	237994460
Ebright et al. CTCs	Chr 2-region19	4	COPS8	Chr 2	237993955	238009109
Ebright et al. CTCs	Chr 2-region19	4	COL6A3	Chr 2	238232646	238323018
Ebright et al. CTCs	Chr 2-region19	4	AC112721.2	Chr 2	238337563	238343465
Ebright et al. CTCs	Chr 2-region19	4	MLPH	Chr 2	238394071	238463961
Ebright et al. CTCs	Chr 2-region19	4	RAB17	Chr 2	238482965	238510257
Ebright et al. CTCs	Chr 2-region19	4	LRRFIP1	Chr 2	238536219	238722325
Ebright et al. CTCs	Chr 2-region19	4	RAMP1	Chr 2	238767536	238820756
Ebright et al. CTCs	Chr 2-region19	4	UBE2F	Chr 2	238875469	238951236
Ebright et al. CTCs	Chr 2-region19	4	SCLY	Chr 2	238969530	239008054
Ebright et al. CTCs	Chr 2-region19	4	KLHL30	Chr 2	239047363	239061588
Ebright et al. CTCs	Chr 2-region19	4	ILKAP	Chr 2	239079042	239112370
Ebright et al. CTCs	Chr 2-region19	4	HES6	Chr 2	239146908	239149303
Ebright et al. CTCs	Chr 2-region19	4	PER2	Chr 2	239152679	239198743
Ebright et al. CTCs	Chr 2-region19	4	TRAF3IP1	Chr 2	239229082	239309541
Ebright et al. CTCs	Chr 2-region19	4	ASB1	Chr 2	239335383	239360891
Ebright et al. CTCs	Chr 2-region19	4	HDAC4	Chr 2	239969864	240323348
Ebright et al. CTCs	Chr 2-region19	4	NDUFA10	Chr 2	240831867	240964819
Ebright et al. CTCs	Chr 2-region19	4	MYEOV2	Chr 2	241065980	241076224
Ebright et al. CTCs	Chr 2-region19	4	GPC1	Chr 2	241375088	241407493
Ebright et al. CTCs	Chr 2-region19	4	AC110619.2	Chr 2	241388732	241396131
Ebright et al. CTCs	Chr 2-region19	4	ANKMY1	Chr 2	241418839	241508626
Ebright et al. CTCs	Chr 2-region19	4	DUSP28	Chr 2	241499471	241503431
Ebright et al. CTCs	Chr 2-region19	4	RNPEPL1	Chr 2	241505221	241520789
Ebright et al. CTCs	Chr 2-region19	4	GPR35	Chr 2	241544848	241570676
Ebright et al. CTCs	Chr 2-region19	4	MTERFD2	Chr 2	242011584	242041747
Ebright et al. CTCs	Chr 2-region19	4	PASK	Chr 2	242045514	242089679
Ebright et al. CTCs	Chr 2-region19	4	PPP1R7	Chr 2	242088991	242123067
Ebright et al. CTCs	Chr 2-region19	4	HDLBP	Chr 2	242166679	242256476
Ebright et al. CTCs	Chr 2-region19	4	AC104841.2	Chr 2	242167319	242168850
Ebright et al. CTCs	Chr 2-region19	4	SEPT2	Chr 2	242254515	242293442
Ebright et al. CTCs	Chr 2-region19	4	FARP2	Chr 2	242295658	242434256
Ebright et al. CTCs	Chr 2-region19	4	STK25	Chr 2	242432089	242449145
Ebright et al. CTCs	Chr 2-region19	4	BOK	Chr 2	242498136	242513546
Ebright et al. CTCs	Chr 2-region19	4	THAP4	Chr 2	242523820	242576864
Ebright et al. CTCs	Chr 2-region19	4	ATG4B	Chr 2	242576628	242613272
Ebright et al. CTCs	Chr 2-region19	4	DTYMK	Chr 2	242615157	242626406
Ebright et al. CTCs	Chr 2-region19	4	AC133528.2	Chr 2	242629829	242633704
Ebright et al. CTCs	Chr 2-region19	4	ING5	Chr 2	242641450	242668893
Ebright et al. CTCs	Chr 2-region19	4	D2HGDH	Chr 2	242673994	242708231
Ebright et al. CTCs	Chr 2-region19	4	AC114730.3	Chr 2	242749407	242753111
Ebright et al. CTCs	Chr 2-region19	4	AC131097.3	Chr 2	242823514	243020873
Ebright et al. CTCs	Chr 2-region19	4	AC093642.3	Chr 2	242912834	242919427
Ebright et al. CTCs	Chr 3-region21	2	CEP70	Chr 3	138213186	138313380
Ebright et al. CTCs	Chr 3-region21	2	PIK3CB	Chr 3	138372860	138553780
Ebright et al. CTCs	Chr 3-region21	2	MRPS22	Chr 3	138724648	139076065
Ebright et al. CTCs	Chr 3-region21	2	COPB2	Chr 3	139074442	139108574
Ebright et al. CTCs	Chr 3-region21	2	RBP1	Chr 3	139236276	139258671
Ebright et al. CTCs	Chr 3-region21	2	NMNAT3	Chr 3	139279022	139396859
Ebright et al. CTCs	Chr 3-region21	2	CLSTN2	Chr 3	139654027	140296239
Ebright et al. CTCs	Chr 3-region21	2	SLC25A36	Chr 3	140660672	140698775
Ebright et al. CTCs	Chr 3-region21	2	ZBTB38	Chr 3	141043055	141168634
Ebright et al. CTCs	Chr 3-region21	2	RASA2	Chr 3	141205889	141334184
Ebright et al. CTCs	Chr 3-region21	2	RNF7	Chr 3	141457046	141466402
Ebright et al. CTCs	Chr 3-region21	2	ATP1B3	Chr 3	141594966	141645356
Ebright et al. CTCs	Chr 3-region21	2	TFDP2	Chr 3	141663277	141868386
Ebright et al. CTCs	Chr 3-region21	2	GK5	Chr 3	141882414	141944449
Ebright et al. CTCs	Chr 3-region21	2	XRN1	Chr 3	142025449	142166904
Ebright et al. CTCs	Chr 3-region21	2	ATR	Chr 3	142168077	142297668
Ebright et al. CTCs	Chr 3-region21	2	PAQR9	Chr 3	142668006	142682178
Ebright et al. CTCs	Chr 3-region21	2	U2SURP	Chr 3	142683339	142779567
Ebright et al. CTCs	Chr 3-region21	2	CHST2	Chr 3	142838173	142841800
Ebright et al. CTCs	Chr 3-region21	2	SLC9A9	Chr 3	142984064	143567373
Ebright et al. CTCs	Chr 3-region21	2	C3orf58	Chr 3	143690640	143767561
Ebright et al. CTCs	Chr 3-region21	2	PLOD2	Chr 3	145787227	145881440
Ebright et al. CTCs	Chr 3-region21	2	PLSCR1	Chr 3	146232967	146262651
Ebright et al. CTCs	Chr 3-region21	2	CPB1	Chr 3	148508889	148577974
Ebright et al. CTCs	Chr 3-region21	2	GYG1	Chr 3	148709128	148745419
Ebright et al. CTCs	Chr 3-region21	2	HLTF	Chr 3	148747914	148804341
Ebright et al. CTCs	Chr 3-region21	2	HPS3	Chr 3	148847371	148891519
Ebright et al. CTCs	Chr 3-region21	2	CP	Chr 3	148880197	148939842
Ebright et al. CTCs	Chr 3-region21	2	TM4SF1	Chr 3	149086809	149095652
Ebright et al. CTCs	Chr 3-region21	2	WWTR1	Chr 3	149235022	149454501
Ebright et al. CTCs	Chr 3-region21	2	RNF13	Chr 3	149530495	149679926
Ebright et al. CTCs	Chr 3-region21	2	PFN2	Chr 3	149682691	149768575
Ebright et al. CTCs	Chr 3-region21	2	TSC22D2	Chr 3	150126122	150184218
Ebright et al. CTCs	Chr 3-region21	2	SERP1	Chr 3	150259781	150321015
Ebright et al. CTCs	Chr 3-region21	2	EIF2A	Chr 3	150264465	150302029
Ebright et al. CTCs	Chr 3-region21	2	SELT	Chr 3	150320662	150348222
Ebright et al. CTCs	Chr 3-region21	2	SIAH2	Chr 3	150458914	150481264
Ebright et al. CTCs	Chr 3-region23	4	FNDC3B	Chr 3	171757418	172119455
Ebright et al. CTCs	Chr 3-region23	4	AC092964.1	Chr 3	172034218	172039513
Ebright et al. CTCs	Chr 3-region23	4	TNFSF10	Chr 3	172223298	172241297
Ebright et al. CTCs	Chr 3-region23	4	ECT2	Chr 3	172468472	172539264
Ebright et al. CTCs	Chr 3-region23	4	TBL1XR1	Chr 3	176737143	176915261
Ebright et al. CTCs	Chr 3-region23	4	ZMAT3	Chr 3	178735011	178790067
Ebright et al. CTCs	Chr 3-region23	4	PIK3CA	Chr 3	178865902	178957881
Ebright et al. CTCs	Chr 3-region23	4	KCNMB3	Chr 3	178957530	178984790
Ebright et al. CTCs	Chr 3-region23	4	ZNF639	Chr 3	179040779	179053323
Ebright et al. CTCs	Chr 3-region23	4	MFN1	Chr 3	179065480	179112719
Ebright et al. CTCs	Chr 3-region23	4	AC007620.3	Chr 3	179114749	179116979
Ebright et al. CTCs	Chr 3-region23	4	GNB4	Chr 3	179116990	179169378
Ebright et al. CTCs	Chr 3-region23	4	ACTL6A	Chr 3	179280668	179306196
Ebright et al. CTCs	Chr 3-region23	4	MRPL47	Chr 3	179306073	179322442
Ebright et al. CTCs	Chr 3-region23	4	NDUFB5	Chr 3	179322478	179345435
Ebright et al. CTCs	Chr 3-region23	4	USP13	Chr 3	179370543	179507189
Ebright et al. CTCs	Chr 3-region23	4	TTC14	Chr 3	180319918	180335616
Ebright et al. CTCs	Chr 3-region23	4	FXR1	Chr 3	180585929	180700541
Ebright et al. CTCs	Chr 3-region23	4	DNAJC19	Chr 3	180701497	180707562
Ebright et al. CTCs	Chr 3-region23	4	ATP11B	Chr 3	182511288	182639423
Ebright et al. CTCs	Chr 3-region23	4	DCUN1D1	Chr 3	182655862	182703741
Ebright et al. CTCs	Chr 3-region23	4	MCCC1	Chr 3	182733006	182833863
Ebright et al. CTCs	Chr 3-region23	4	MCF2L2	Chr 3	182895831	183146566
Ebright et al. CTCs	Chr 3-region23	4	KLHL6	Chr 3	183205319	183273477
Ebright et al. CTCs	Chr 3-region23	4	KLHL24	Chr 3	183353356	183402265
Ebright et al. CTCs	Chr 3-region23	4	YEATS2	Chr 3	183415606	183530413
Ebright et al. CTCs	Chr 3-region23	4	MAP6D1	Chr 3	183533664	183543382
Ebright et al. CTCs	Chr 3-region23	4	PARL	Chr 3	183547173	183602721
Ebright et al. CTCs	Chr 3-region23	4	ABCC5	Chr 3	183637722	183735803
Ebright et al. CTCs	Chr 3-region23	4	EIF2B5	Chr 3	183852826	184402546
Ebright et al. CTCs	Chr 3-region23	4	DVL3	Chr 3	183873176	183891398
Ebright et al. CTCs	Chr 3-region23	4	AP2M1	Chr 3	183892477	183901879
Ebright et al. CTCs	Chr 3-region23	4	ABCF3	Chr 3	183903811	183911800
Ebright et al. CTCs	Chr 3-region23	4	ALG3	Chr 3	183960089	183967336
Ebright et al. CTCs	Chr 3-region23	4	ECE2	Chr 3	183967438	184010819
Ebright et al. CTCs	Chr 3-region23	4	PSMD2	Chr 3	184016497	184026842
Ebright et al. CTCs	Chr 3-region23	4	EIF4G1	Chr 3	184032283	184053146
Ebright et al. CTCs	Chr 3-region23	4	FAM131A	Chr 3	184053714	184064063
Ebright et al. CTCs	Chr 3-region23	4	POLR2H	Chr 3	184079506	184086384
Ebright et al. CTCs	Chr 3-region23	4	EPHB3	Chr 3	184279572	184300197
Ebright et al. CTCs	Chr 3-region23	4	MAGEF1	Chr 3	184428156	184429836
Ebright et al. CTCs	Chr 3-region23	4	VPS8	Chr 3	184529931	184770402
Ebright et al. CTCs	Chr 3-region23	4	C3orf70	Chr 3	184795838	184870802
Ebright et al. CTCs	Chr 3-region23	4	EHHADH	Chr 3	184908412	184999778
Ebright et al. CTCs	Chr 3-region23	4	MAP3K13	Chr 3	185000729	185206885
Ebright et al. CTCs	Chr 3-region23	4	TMEM41A	Chr 3	185194284	185216845
Ebright et al. CTCs	Chr 3-region23	4	LIPH	Chr 3	185224050	185270401
Ebright et al. CTCs	Chr 3-region23	4	SENP2	Chr 3	185300284	185351339
Ebright et al. CTCs	Chr 3-region23	4	IGF2BP2	Chr 3	185361527	185542844
Ebright et al. CTCs	Chr 3-region23	4	C3orf65	Chr 3	185430316	185447575
Ebright et al. CTCs	Chr 3-region23	4	TRA2B	Chr 3	185633694	185655924
Ebright et al. CTCs	Chr 3-region23	4	DGKG	Chr 3	185823457	186080026
Ebright et al. CTCs	Chr 3-region23	4	CRYGS	Chr 3	186256230	186264491
Ebright et al. CTCs	Chr 3-region23	4	TBCCD1	Chr 3	186263862	186288332
Ebright et al. CTCs	Chr 3-region23	4	DNAJB11	Chr 3	186285192	186315061
Ebright et al. CTCs	Chr 3-region23	4	EIF4A2	Chr 3	186500994	186507689
Ebright et al. CTCs	Chr 3-region23	4	RFC4	Chr 3	186507669	186524847
Ebright et al. CTCs	Chr 3-region23	4	ADIPOQ	Chr 3	186560463	186576252
Ebright et al. CTCs	Chr 3-region23	4	ST6GAL1	Chr 3	186648274	186796341
Ebright et al. CTCs	Chr 3-region23	4	RPL39L	Chr 3	186838736	186898696
Ebright et al. CTCs	Chr 3-region23	4	BCL6	Chr 3	187439165	187463515
Ebright et al. CTCs	Chr 3-region23	4	LPP	Chr 3	187871072	188608460
Ebright et al. CTCs	Chr 3-region23	4	TPRG1	Chr 3	188665003	189043093
Ebright et al. CTCs	Chr 3-region23	4	CLDN16	Chr 3	190040330	190129932
Ebright et al. CTCs	Chr 3-region23	4	CCDC50	Chr 3	191046866	191116459
Ebright et al. CTCs	Chr 3-region23	4	HRASLS	Chr 3	192958914	192995527
Ebright et al. CTCs	Chr 3-region23	4	ATP13A4	Chr 3	193119866	193310900
Ebright et al. CTCs	Chr 3-region23	4	OPA1	Chr 3	193310933	193415612
Ebright et al. CTCs	Chr 3-region23	4	HES1	Chr 3	193853934	193856521
Ebright et al. CTCs	Chr 3-region23	4	LINC00887	Chr 3	194014254	194030592
Ebright et al. CTCs	Chr 3-region23	4	GP5	Chr 3	194115550	194119995
Ebright et al. CTCs	Chr 3-region23	4	ATP13A3	Chr 3	194123401	194219093
Ebright et al. CTCs	Chr 3-region23	4	TMEM44	Chr 3	194308402	194354418
Ebright et al. CTCs	Chr 3-region23	4	LSG1	Chr 3	194361517	194393206
Ebright et al. CTCs	Chr 3-region23	4	AC090505.4	Chr 3	194485967	194489441
Ebright et al. CTCs	Chr 3-region23	4	XXYLT1	Chr 3	194789008	194991896
Ebright et al. CTCs	Chr 3-region23	4	ACAP2	Chr 3	194995465	195163807
Ebright et al. CTCs	Chr 3-region23	4	PPP1R2	Chr 3	195241221	195270209
Ebright et al. CTCs	Chr 3-region23	4	APOD	Chr 3	195295573	195311076
Ebright et al. CTCs	Chr 3-region23	4	LINC00969	Chr 3	195384933	195460422
Ebright et al. CTCs	Chr 3-region23	4	MUC20	Chr 3	195447753	195467994
Ebright et al. CTCs	Chr 3-region23	4	TNK2	Chr 3	195590235	195638816
Ebright et al. CTCs	Chr 3-region23	4	AC124944.3	Chr 3	195638920	195640857
Ebright et al. CTCs	Chr 3-region23	4	TFRC	Chr 3	195754054	195809060
Ebright et al. CTCs	Chr 3-region23	4	SLC51A	Chr 3	195938358	195970049
Ebright et al. CTCs	Chr 3-region23	4	PCYT1A	Chr 3	195941093	196014828
Ebright et al. CTCs	Chr 3-region23	4	TCTEX1D2	Chr 3	196018090	196045170
Ebright et al. CTCs	Chr 3-region23	4	UBXN7	Chr 3	196074533	196159345
Ebright et al. CTCs	Chr 3-region23	4	RNF168	Chr 3	196195654	196230639
Ebright et al. CTCs	Chr 3-region23	4	WDR53	Chr 3	196281056	196295545
Ebright et al. CTCs	Chr 3-region23	4	FBXO45	Chr 3	196295482	196315930
Ebright et al. CTCs	Chr 3-region23	4	NRROS	Chr 3	196366557	196388875
Ebright et al. CTCs	Chr 3-region23	4	PIGX	Chr 3	196366646	196462878
Ebright et al. CTCs	Chr 3-region23	4	CEP19	Chr 3	196433148	196439164
Ebright et al. CTCs	Chr 3-region23	4	PAK2	Chr 3	196466728	196559518
Ebright et al. CTCs	Chr 3-region23	4	SENP5	Chr 3	196594727	196661585
Ebright et al. CTCs	Chr 3-region23	4	NCBP2	Chr 3	196662273	196669468
Ebright et al. CTCs	Chr 3-region23	4	PIGZ	Chr 3	196673214	196695931
Ebright et al. CTCs	Chr 3-region23	4	MFI2	Chr 3	196715492	196756687
Ebright et al. CTCs	Chr 3-region23	4	DLG1	Chr 3	196769431	197026171
Ebright et al. CTCs	Chr 3-region23	4	BDH1	Chr 3	197236654	197300194
Ebright et al. CTCs	Chr 3-region23	4	KIAA0226	Chr 3	197398264	197476598
Ebright et al. CTCs	Chr 3-region23	4	FYTTD1	Chr 3	197464050	197514467
Ebright et al. CTCs	Chr 3-region23	4	LRCH3	Chr 3	197518097	197615307
Ebright et al. CTCs	Chr 3-region23	4	IQCG	Chr 3	197615946	197687013
Ebright et al. CTCs	Chr 3-region23	4	RPL35A	Chr 3	197676858	197683481
Ebright et al. CTCs	Chr 3-region23	4	LMLN	Chr 3	197687071	197770591
Ebright et al. CTCs	Chr 4-region24	4	ZNF595	Chr 4	53179	88099
Ebright et al. CTCs	Chr 4-region24	4	ZNF732	Chr 4	264464	299110
Ebright et al. CTCs	Chr 4-region24	4	ZNF141	Chr 4	331603	378653
Ebright et al. CTCs	Chr 4-region24	4	ZNF721	Chr 4	419604	492945
Ebright et al. CTCs	Chr 4-region24	4	PIGG	Chr 4	492989	533985
Ebright et al. CTCs	Chr 4-region24	4	PDE6B	Chr 4	619373	664571
Ebright et al. CTCs	Chr 4-region24	4	ATP5I	Chr 4	666225	668127
Ebright et al. CTCs	Chr 4-region24	4	MYL5	Chr 4	667369	675822
Ebright et al. CTCs	Chr 4-region24	4	MFSD7	Chr 4	675618	683230
Ebright et al. CTCs	Chr 4-region24	4	PCGF3	Chr 4	699537	764428
Ebright et al. CTCs	Chr 4-region24	4	GAK	Chr 4	843064	926161
Ebright et al. CTCs	Chr 4-region24	4	TMEM175	Chr 4	926175	952444
Ebright et al. CTCs	Chr 4-region24	4	DGKQ	Chr 4	952675	980683
Ebright et al. CTCs	Chr 4-region24	4	FGFRL1	Chr 4	1003724	1020685
Ebright et al. CTCs	Chr 4-region24	4	RNF212	Chr 4	1050038	1107350
Ebright et al. CTCs	Chr 4-region24	4	SPON2	Chr 4	1160720	1202750
Ebright et al. CTCs	Chr 4-region24	4	CTBP1	Chr 4	1205236	1243741
Ebright et al. CTCs	Chr 4-region24	4	MAEA	Chr 4	1283639	1333935
Ebright et al. CTCs	Chr 4-region24	4	UVSSA	Chr 4	1341054	1381837
Ebright et al. CTCs	Chr 4-region24	4	CRIPAK	Chr 4	1385340	1389780
Ebright et al. CTCs	Chr 4-region24	4	SLBP	Chr 4	1694527	1714282
Ebright et al. CTCs	Chr 4-region24	4	TMEM129	Chr 4	1717679	1723085
Ebright et al. CTCs	Chr 4-region24	4	TACC3	Chr 4	1723227	1746898
Ebright et al. CTCs	Chr 4-region24	4	LETM1	Chr 4	1813206	1857974
Ebright et al. CTCs	Chr 4-region24	4	WHSC1	Chr 4	1873151	1983934
Ebright et al. CTCs	Chr 4-region24	4	NELFA	Chr 4	1984441	2043630
Ebright et al. CTCs	Chr 4-region24	4	POLN	Chr 4	2073645	2243848
Ebright et al. CTCs	Chr 4-region24	4	HAUS3	Chr 4	2229191	2243891
Ebright et al. CTCs	Chr 4-region24	4	MXD4	Chr 4	2249159	2264021
Ebright et al. CTCs	Chr 4-region24	4	RNF4	Chr 4	2463947	2627047
Ebright et al. CTCs	Chr 4-region24	4	FAM193A	Chr 4	2626988	2734292
Ebright et al. CTCs	Chr 4-region24	4	TNIP2	Chr 4	2743375	2758103
Ebright et al. CTCs	Chr 4-region24	4	SH3BP2	Chr 4	2794750	2842825
Ebright et al. CTCs	Chr 4-region24	4	ADD1	Chr 4	2845584	2931803
Ebright et al. CTCs	Chr 4-region24	4	MFSD10	Chr 4	2932288	2936586
Ebright et al. CTCs	Chr 4-region24	4	NOP14	Chr 4	2939660	2965112
Ebright et al. CTCs	Chr 4-region24	4	GRK4	Chr 4	2965335	3042474
Ebright et al. CTCs	Chr 4-region24	4	HTT	Chr 4	3076408	3245676
Ebright et al. CTCs	Chr 4-region24	4	RGS12	Chr 4	3294755	3441640
Ebright et al. CTCs	Chr 4-region24	4	LRPAP1	Chr 4	3508103	3534286
Ebright et al. CTCs	Chr 4-region24	4	LYAR	Chr 4	4269428	4291896
Ebright et al. CTCs	Chr 4-region24	4	NSG1	Chr 4	4349867	4420785
Ebright et al. CTCs	Chr 4-region24	4	STX18	Chr 4	4417469	4544073
Ebright et al. CTCs	Chr 4-region24	4	MSX1	Chr 4	4861393	4865663
Ebright et al. CTCs	Chr 4-region24	4	CYTL1	Chr 4	5016313	5021199
Ebright et al. CTCs	Chr 4-region24	4	WFS1	Chr 4	6271576	6304992
Ebright et al. CTCs	Chr 4-region24	4	PPP2R2C	Chr 4	6322305	6565327
Ebright et al. CTCs	Chr 4-region24	4	MAN2B2	Chr 4	6576902	6625089
Ebright et al. CTCs	Chr 4-region24	4	MRFAP1	Chr 4	6641818	6644472
Ebright et al. CTCs	Chr 4-region24	4	AC093323.3	Chr 4	6675178	6677774
Ebright et al. CTCs	Chr 4-region24	4	S100P	Chr 4	6694796	6698897
Ebright et al. CTCs	Chr 4-region24	4	MRFAP1L1	Chr 4	6709428	6711607
Ebright et al. CTCs	Chr 4-region24	4	BLOC1S4	Chr 4	6717842	6719387
Ebright et al. CTCs	Chr 4-region24	4	KIAA0232	Chr 4	6783102	6885897
Ebright et al. CTCs	Chr 4-region24	4	TBC1D14	Chr 4	6910969	7034845
Ebright et al. CTCs	Chr 4-region24	4	TADA2B	Chr 4	7043626	7059679
Ebright et al. CTCs	Chr 4-region24	4	GRPEL1	Chr 4	7060633	7069924
Ebright et al. CTCs	Chr 4-region24	4	AFAP1	Chr 4	7760441	7941653
Ebright et al. CTCs	Chr 4-region24	4	ABLIM2	Chr 4	7967039	8160559
Ebright et al. CTCs	Chr 4-region24	4	ACOX3	Chr 4	8368009	8442450
Ebright et al. CTCs	Chr 4-region24	4	WDR1	Chr 4	10075963	10118573
Ebright et al. CTCs	Chr 4-region24	4	ZNF518B	Chr 4	10441498	10459034
Ebright et al. CTCs	Chr 4-region24	4	CLNK	Chr 4	10488019	10686489
Ebright et al. CTCs	Chr 4-region24	4	BOD1L1	Chr 4	13570362	13629347
Ebright et al. CTCs	Chr 4-region24	4	AC007126.1	Chr 4	13779001	13783781
Ebright et al. CTCs	Chr 4-region24	4	LINC00504	Chr 4	14472089	14889793
Ebright et al. CTCs	Chr 4-region24	4	CPEB2	Chr 4	15004298	15071777
Ebright et al. CTCs	Chr 4-region24	4	CC2D2A	Chr 4	15471489	15603180
Ebright et al. CTCs	Chr 4-region24	4	FBXL5	Chr 4	15606162	15683302
Ebright et al. CTCs	Chr 4-region24	4	FAM200B	Chr 4	15683285	15707188
Ebright et al. CTCs	Chr 4-region24	4	BST1	Chr 4	15704573	15739936
Ebright et al. CTCs	Chr 4-region24	4	FGFBP2	Chr 4	15961866	15970932
Ebright et al. CTCs	Chr 4-region24	4	TAPT1	Chr 4	16162128	16229033
Ebright et al. CTCs	Chr 4-region24	4	QDPR	Chr 4	17461884	17513857
Ebright et al. CTCs	Chr 4-region24	4	LAP3	Chr 4	17578815	17609595
Ebright et al. CTCs	Chr 4-region24	4	MED28	Chr 4	17616254	17635728
Ebright et al. CTCs	Chr 4-region24	4	FAM184B	Chr 4	17630929	17783135
Ebright et al. CTCs	Chr 4-region24	4	DCAF16	Chr 4	17802278	17812381
Ebright et al. CTCs	Chr 4-region24	4	NCAPG	Chr 4	17812525	17846485
Ebright et al. CTCs	Chr 4-region24	4	GPR125	Chr 4	22346694	22517677
Ebright et al. CTCs	Chr 4-region24	4	DHX15	Chr 4	24519064	24586173
Ebright et al. CTCs	Chr 4-region24	4	CCDC149	Chr 4	24807739	24981826
Ebright et al. CTCs	Chr 4-region24	4	SEPSECS	Chr 4	25121627	25162204
Ebright et al. CTCs	Chr 4-region24	4	PI4K2B	Chr 4	25162263	25280714
Ebright et al. CTCs	Chr 5-region27	2	ATP6AP1L	Chr 5	81575281	81682796
Ebright et al. CTCs	Chr 5-region27	2	TMEM167A	Chr 5	82348665	82373682
Ebright et al. CTCs	Chr 5-region27	2	COX7C	Chr 5	85913721	85916779
Ebright et al. CTCs	Chr 5-region27	2	AC008394.1	Chr 5	86512423	86534822
Ebright et al. CTCs	Chr 5-region27	2	RASA1	Chr 5	86563705	86687748
Ebright et al. CTCs	Chr 5-region27	2	CCNH	Chr 5	86687311	86708836
Ebright et al. CTCs	Chr 5-region27	2	MEF2C	Chr 5	88013975	88199922
Ebright et al. CTCs	Chr 5-region27	2	LYSMD3	Chr 5	89811428	89825401
Ebright et al. CTCs	Chr 5-region27	2	GPR98	Chr 5	89825161	90460038
Ebright et al. CTCs	Chr 5-region27	2	ARRDC3	Chr 5	90664541	90679176
Ebright et al. CTCs	Chr 5-region27	2	NR2F1	Chr 5	92919043	92930321
Ebright et al. CTCs	Chr 5-region27	2	POU5F2	Chr 5	93070508	93077343
Ebright et al. CTCs	Chr 5-region27	2	MCTP1	Chr 5	94039446	94620279
Ebright et al. CTCs	Chr 5-region27	2	FAM81B	Chr 5	94727048	94786158
Ebright et al. CTCs	Chr 5-region27	2	TTC37	Chr 5	94799599	94890711
Ebright et al. CTCs	Chr 5-region27	2	ARSK	Chr 5	94890778	94940768
Ebright et al. CTCs	Chr 5-region27	2	RHOBTB3	Chr 5	95049226	95160087
Ebright et al. CTCs	Chr 5-region27	2	GLRX	Chr 5	95087023	95158709
Ebright et al. CTCs	Chr 5-region27	2	C5orf27	Chr 5	95187936	95195837
Ebright et al. CTCs	Chr 5-region27	2	ELL2	Chr 5	95220802	95297775
Ebright et al. CTCs	Chr 5-region27	2	PCSK1	Chr 5	95726119	95769847
Ebright et al. CTCs	Chr 5-region27	2	CAST	Chr 5	95860971	96115299
Ebright et al. CTCs	Chr 5-region27	2	ERAP1	Chr 5	96096521	96143803
Ebright et al. CTCs	Chr 5-region27	2	ERAP2	Chr 5	96211643	96255420
Ebright et al. CTCs	Chr 5-region27	2	LNPEP	Chr 5	96271098	96373219
Ebright et al. CTCs	Chr 5-region27	2	RIOK2	Chr 5	96496571	96518964
Ebright et al. CTCs	Chr 5-region27	2	RGMB	Chr 5	98104354	98134347
Ebright et al. CTCs	Chr 5-region27	2	CHD1	Chr 5	98190908	98262240
Ebright et al. CTCs	Chr 5-region27	2	FAM174A	Chr 5	99871009	99922445
Ebright et al. CTCs	Chr 5-region27	2	ST8SIA4	Chr 5	100142639	100238970
Ebright et al. CTCs	Chr 5-region27	2	PPIP5K2	Chr 5	102455853	102548500
Ebright et al. CTCs	Chr 5-region27	2	C5orf30	Chr 5	102594403	102614361
Ebright et al. CTCs	Chr 5-region27	2	NUDT12	Chr 5	102884556	102898494
Ebright et al. CTCs	Chr 5-region27	2	EFNA5	Chr 5	106712590	107006596
Ebright et al. CTCs	Chr 5-region27	2	FBXL17	Chr 5	107194736	107717799
Ebright et al. CTCs	Chr 5-region27	2	FER	Chr 5	108083523	108532542
Ebright et al. CTCs	Chr 5-region27	2	PJA2	Chr 5	108670410	108745695
Ebright et al. CTCs	Chr 5-region27	2	MAN2A1	Chr 5	109025067	109205326
Ebright et al. CTCs	Chr 5-region27	2	SLC25A46	Chr 5	110073837	110100857
Ebright et al. CTCs	Chr 5-region27	2	STARD4	Chr 5	110831731	110848288
Ebright et al. CTCs	Chr 5-region27	2	NREP	Chr 5	110998318	111333161
Ebright et al. CTCs	Chr 5-region27	2	EPB41L4A	Chr 5	111478138	111755013
Ebright et al. CTCs	Chr 5-region27	2	SRP19	Chr 5	112196919	112205485
Ebright et al. CTCs	Chr 5-region27	2	REEP5	Chr 5	112212084	112258236
Ebright et al. CTCs	Chr 5-region27	2	DCP2	Chr 5	112312399	112356667
Ebright et al. CTCs	Chr 5-region27	2	MCC	Chr 5	112357796	112824527
Ebright et al. CTCs	Chr 5-region27	2	YTHDC2	Chr 5	112849380	112930982
Ebright et al. CTCs	Chr 5-region27	2	PGGT1B	Chr 5	114546527	114598569
Ebright et al. CTCs	Chr 5-region27	2	CCDC112	Chr 5	114602885	114632528
Ebright et al. CTCs	Chr 5-region27	2	TMED7	Chr 5	114949205	114968689
Ebright et al. CTCs	Chr 5-region27	2	ATG12	Chr 5	115163893	115177555
Ebright et al. CTCs	Chr 5-region27	2	AP3S1	Chr 5	115177178	115249778
Ebright et al. CTCs	Chr 5-region27	2	COMMD10	Chr 5	115420688	115748459
Ebright et al. CTCs	Chr 5-region27	2	DMXL1	Chr 5	118373467	118584833
Ebright et al. CTCs	Chr 5-region27	2	TNFAIP8	Chr 5	118604387	118735383
Ebright et al. CTCs	Chr 5-region27	2	HSD17B4	Chr 5	118788138	118972894
Ebright et al. CTCs	Chr 5-region27	2	SRFBP1	Chr 5	121297656	121411265
Ebright et al. CTCs	Chr 5-region27	2	SNCAIP	Chr 5	121647049	121799914
Ebright et al. CTCs	Chr 5-region27	2	SNX2	Chr 5	122110691	122165803
Ebright et al. CTCs	Chr 5-region27	2	SNX24	Chr 5	122179134	122365049
Ebright et al. CTCs	Chr 5-region27	2	CSNK1G3	Chr 5	122847793	122952739
Ebright et al. CTCs	Chr 5-region27	2	ZNF608	Chr 5	123972608	124084500
Ebright et al. CTCs	Chr 5-region27	2	ALDH7A1	Chr 5	125877533	125931110
Ebright et al. CTCs	Chr 5-region27	2	PHAX	Chr 5	125935960	125962944
Ebright et al. CTCs	Chr 5-region27	2	MARCH3	Chr 5	126203406	126366500
Ebright et al. CTCs	Chr 5-region27	2	C5orf63	Chr 5	126378250	126409184
Ebright et al. CTCs	Chr 5-region27	2	PRRC1	Chr 5	126853301	126890781
Ebright et al. CTCs	Chr 5-region27	2	SLC12A2	Chr 5	127419458	127525380
Ebright et al. CTCs	Chr 5-region27	2	ISOC1	Chr 5	128430444	128449721
Ebright et al. CTCs	Chr 5-region27	2	KIAA1024L	Chr 5	129083772	129102425
Ebright et al. CTCs	Chr 5-region27	2	HINT1	Chr 5	130494720	130507428
Ebright et al. CTCs	Chr 5-region27	2	LYRM7	Chr 5	130506503	130541119
Ebright et al. CTCs	Chr 5-region27	2	CDC42SE2	Chr 5	130581186	130734140
Ebright et al. CTCs	Chr 5-region27	2	RAPGEF6	Chr 5	130759614	130970929
Ebright et al. CTCs	Chr 5-region27	2	FNIP1	Chr 5	130977407	131132710
Ebright et al. CTCs	Chr 5-region27	2	ACSL6	Chr 5	131142683	131347936
Ebright et al. CTCs	Chr 5-region27	2	P4HA2	Chr 5	131527531	131631008
Ebright et al. CTCs	Chr 5-region27	2	SLC22A4	Chr 5	131630136	131679899
Ebright et al. CTCs	Chr 5-region27	2	SLC22A5	Chr 5	131705444	131731306
Ebright et al. CTCs	Chr 5-region27	2	IRF1	Chr 5	131817301	131826490
Ebright et al. CTCs	Chr 5-region27	2	RAD50	Chr 5	131891711	131980313
Ebright et al. CTCs	Chr 5-region27	2	KIF3A	Chr 5	132028320	132073330
Ebright et al. CTCs	Chr 5-region27	2	SEPT8	Chr 5	132086509	132142933
Ebright et al. CTCs	Chr 5-region27	2	SOWAHA	Chr 5	132149033	132152488
Ebright et al. CTCs	Chr 5-region27	2	AC004775.5	Chr 5	132152940	132153692
Ebright et al. CTCs	Chr 5-region27	2	SHROOM1	Chr 5	132157833	132166590
Ebright et al. CTCs	Chr 5-region27	2	UQCRQ	Chr 5	132202252	132203723
Ebright et al. CTCs	Chr 5-region27	2	LEAP2	Chr 5	132208014	132210738
Ebright et al. CTCs	Chr 5-region27	2	AFF4	Chr 5	132211071	132299326
Ebright et al. CTCs	Chr 5-region27	2	ZCCHC10	Chr 5	132332677	132362296
Ebright et al. CTCs	Chr 5-region27	2	HSPA4	Chr 5	132387654	132442141
Ebright et al. CTCs	Chr 5-region27	2	FSTL4	Chr 5	132532147	132948255
Ebright et al. CTCs	Chr 5-region27	2	C5orf15	Chr 5	133291201	133304478
Ebright et al. CTCs	Chr 5-region27	2	VDAC1	Chr 5	133307606	133340824
Ebright et al. CTCs	Chr 5-region27	2	SKP1	Chr 5	133484633	133512729
Ebright et al. CTCs	Chr 5-region27	2	PPP2CA	Chr 5	133530025	133561833
Ebright et al. CTCs	Chr 5-region27	2	CDKL3	Chr 5	133541305	133706738
Ebright et al. CTCs	Chr 5-region27	2	UBE2B	Chr 5	133706870	133727683
Ebright et al. CTCs	Chr 5-region27	2	CDKN2AIPNL	Chr 5	133737778	133747589
Ebright et al. CTCs	Chr 5-region27	2	SAR1B	Chr 5	133936834	133984961
Ebright et al. CTCs	Chr 5-region27	2	SEC24A	Chr 5	133984479	134063513
Ebright et al. CTCs	Chr 5-region27	2	CAMLG	Chr 5	134074191	134087847
Ebright et al. CTCs	Chr 5-region27	2	DDX46	Chr 5	134094469	134190823
Ebright et al. CTCs	Chr 5-region27	2	TXNDC15	Chr 5	134209493	134237215
Ebright et al. CTCs	Chr 5-region27	2	PCBD2	Chr 5	134240596	134343649
Ebright et al. CTCs	Chr 5-region27	2	H2AFY	Chr 5	134669590	134735604
Ebright et al. CTCs	Chr 5-region27	2	CXCL14	Chr 5	134906373	134914969
Ebright et al. CTCs	Chr 5-region27	2	SLC25A48	Chr 5	135170338	135224326
Ebright et al. CTCs	Chr 5-region27	2	TGFBI	Chr 5	135364584	135399507
Ebright et al. CTCs	Chr 5-region27	2	SMAD5	Chr 5	135468534	135524435
Ebright et al. CTCs	Chr 5-region27	2	KLHL3	Chr 5	136953189	137071779
Ebright et al. CTCs	Chr 5-region27	2	HNRNPA0	Chr 5	137087075	137090039
Ebright et al. CTCs	Chr 5-region27	2	PKD2L2	Chr 5	137223657	137278436
Ebright et al. CTCs	Chr 5-region27	2	FAM13B	Chr 5	137273649	137387650
Ebright et al. CTCs	Chr 5-region27	2	BRD8	Chr 5	137475455	137514675
Ebright et al. CTCs	Chr 5-region27	2	CDC23	Chr 5	137523339	137549032
Ebright et al. CTCs	Chr 5-region27	2	GFRA3	Chr 5	137588068	137610360
Ebright et al. CTCs	Chr 5-region27	2	CDC25C	Chr 5	137620954	137674044
Ebright et al. CTCs	Chr 5-region27	2	FAM53C	Chr 5	137667624	137685416
Ebright et al. CTCs	Chr 5-region27	2	KDM3B	Chr 5	137688285	137772717
Ebright et al. CTCs	Chr 5-region27	2	REEP2	Chr 5	137774706	137782658
Ebright et al. CTCs	Chr 5-region27	2	EGR1	Chr 5	137801179	137805004
Ebright et al. CTCs	Chr 5-region27	2	ETF1	Chr 5	137841784	137878989
Ebright et al. CTCs	Chr 5-region27	2	HSPA9	Chr 5	137890571	137911133
Ebright et al. CTCs	Chr 5-region27	2	CTNNA1	Chr 5	137946656	138270723
Ebright et al. CTCs	Chr 5-region27	2	SIL1	Chr 5	138282409	138629246
Ebright et al. CTCs	Chr 5-region27	2	MATR3	Chr 5	138609441	138667360
Ebright et al. CTCs	Chr 5-region27	2	PAIP2	Chr 5	138677276	138705406
Ebright et al. CTCs	Chr 5-region27	2	MZB1	Chr 5	138723169	138725770
Ebright et al. CTCs	Chr 5-region27	2	TMEM173	Chr 5	138855119	138862520
Ebright et al. CTCs	Chr 5-region27	2	UBE2D2	Chr 5	138906016	139008018
Ebright et al. CTCs	Chr 5-region27	2	CXXC5	Chr 5	139026884	139063467
Ebright et al. CTCs	Chr 5-region27	2	LINC01024	Chr 5	139452442	139488215
Ebright et al. CTCs	Chr 5-region27	2	PURA	Chr 5	139487362	139496321
Ebright et al. CTCs	Chr 5-region27	2	IGIP	Chr 5	139505521	139508391
Ebright et al. CTCs	Chr 5-region27	2	CYSTM1	Chr 5	139554227	139661637
Ebright et al. CTCs	Chr 5-region27	2	PFDN1	Chr 5	139624624	139682706
Ebright et al. CTCs	Chr 5-region27	2	HBEGF	Chr 5	139712428	139726216
Ebright et al. CTCs	Chr 5-region27	2	ANKHD1	Chr 5	139781399	139929163
Ebright et al. CTCs	Chr 5-region27	2	SRA1	Chr 5	139916925	139937895
Ebright et al. CTCs	Chr 5-region27	2	EIF4EBP3	Chr 5	139927251	139929163
Ebright et al. CTCs	Chr 5-region27	2	APBB3	Chr 5	139937853	139973337
Ebright et al. CTCs	Chr 5-region27	2	SLC35A4	Chr 5	139944041	139948688
Ebright et al. CTCs	Chr 5-region27	2	CD14	Chr 5	140011313	140013286
Ebright et al. CTCs	Chr 5-region27	2	NDUFA2	Chr 5	140018325	140027370
Ebright et al. CTCs	Chr 5-region27	2	TMCO6	Chr 5	140019012	140024993
Ebright et al. CTCs	Chr 5-region27	2	IK	Chr 5	140026643	140042064
Ebright et al. CTCs	Chr 5-region27	2	WDR55	Chr 5	140044261	140053709
Ebright et al. CTCs	Chr 5-region27	2	HARS	Chr 5	140052758	140071609
Ebright et al. CTCs	Chr 5-region27	2	HARS2	Chr 5	140071011	140078889
Ebright et al. CTCs	Chr 5-region27	2	ZMAT2	Chr 5	140078265	140086248
Ebright et al. CTCs	Chr 5-region27	2	PCDHA9	Chr 5	140227048	140391929
Ebright et al. CTCs	Chr 5-region27	2	PCDHB14	Chr 5	140602931	140605858
Ebright et al. CTCs	Chr 5-region27	2	TAF7	Chr 5	140698057	140700330
Ebright et al. CTCs	Chr 5-region27	2	PCDHGB4	Chr 5	140767452	140892546
Ebright et al. CTCs	Chr 5-region27	2	DIAPH1	Chr 5	140894583	140998622
Ebright et al. CTCs	Chr 5-region27	2	HDAC3	Chr 5	141000443	141016437
Ebright et al. CTCs	Chr 5-region27	2	RELL2	Chr 5	141016517	141020644
Ebright et al. CTCs	Chr 5-region27	2	PCDH1	Chr 5	141232938	141258811
Ebright et al. CTCs	Chr 5-region27	2	KIAA0141	Chr 5	141303373	141321612
Ebright et al. CTCs	Chr 5-region27	2	RNF14	Chr 5	141337893	141369856
Ebright et al. CTCs	Chr 5-region27	2	GNPDA1	Chr 5	141371314	141392606
Ebright et al. CTCs	Chr 5-region27	2	NDFIP1	Chr 5	141488070	141534005
Ebright et al. CTCs	Chr 5-region27	2	ARHGAP26	Chr 5	142149949	142608576
Ebright et al. CTCs	Chr 5-region27	2	NR3C1	Chr 5	142657496	142815077
Ebright et al. CTCs	Chr 5-region27	2	YIPF5	Chr 5	143537723	143550278
Ebright et al. CTCs	Chr 5-region27	2	PRELID2	Chr 5	144851362	145214932
Ebright et al. CTCs	Chr 5-region27	2	PLAC8L1	Chr 5	145463949	145483932
Ebright et al. CTCs	Chr 5-region27	2	LARS	Chr 5	145492601	145562223
Ebright et al. CTCs	Chr 5-region27	2	RBM27	Chr 5	145583113	145718814
Ebright et al. CTCs	Chr 5-region27	2	TCERG1	Chr 5	145826874	145891524
Ebright et al. CTCs	Chr 5-region27	2	JAKMIP2	Chr 5	146967990	147162338
Ebright et al. CTCs	Chr 5-region27	2	SPINK9	Chr 5	147700766	147719412
Ebright et al. CTCs	Chr 5-region27	2	FBXO38	Chr 5	147763498	147822399
Ebright et al. CTCs	Chr 5-region27	2	SH3TC2	Chr 5	148303202	148442726
Ebright et al. CTCs	Chr 5-region27	2	ABLIM3	Chr 5	148521046	148640105
Ebright et al. CTCs	Chr 5-region27	2	AFAP1L1	Chr 5	148651434	148721365
Ebright et al. CTCs	Chr 5-region27	2	GRPEL2	Chr 5	148724993	148734146
Ebright et al. CTCs	Chr 5-region27	2	PCYOX1L	Chr 5	148737570	148749216
Ebright et al. CTCs	Chr 5-region27	2	MIR143HG	Chr 5	148786252	148808241
Ebright et al. CTCs	Chr 5-region27	2	CSNK1A1	Chr 5	148871760	148931007
Ebright et al. CTCs	Chr 5-region27	2	ARHGEF37	Chr 5	148931510	149014531
Ebright et al. CTCs	Chr 5-region27	2	PPARGC1B	Chr 5	149109861	149234585
Ebright et al. CTCs	Chr 5-region27	2	PDE6A	Chr 5	149237519	149324356
Ebright et al. CTCs	Chr 5-region27	2	HMGXB3	Chr 5	149379884	149432386
Ebright et al. CTCs	Chr 5-region27	2	TCOF1	Chr 5	149737202	149779871
Ebright et al. CTCs	Chr 5-region27	2	CD74	Chr 5	149781200	149792492
Ebright et al. CTCs	Chr 5-region27	2	RPS14	Chr 5	149822753	149829319
Ebright et al. CTCs	Chr 5-region27	2	NDST1	Chr 5	149865381	149937773
Ebright et al. CTCs	Chr 5-region27	2	SYNPO	Chr 5	149980642	150038782
Ebright et al. CTCs	Chr 5-region27	2	RBM22	Chr 5	150070356	150080669
Ebright et al. CTCs	Chr 5-region27	2	DCTN4	Chr 5	150088002	150138671
Ebright et al. CTCs	Chr 5-region27	2	AC010441.1	Chr 5	150157867	150176297
Ebright et al. CTCs	Chr 5-region27	2	GPX3	Chr 5	150400124	150408554
Ebright et al. CTCs	Chr 5-region27	2	TNIP1	Chr 5	150409506	150473138
Ebright et al. CTCs	Chr 5-region27	2	CCDC69	Chr 5	150560613	150603706
Ebright et al. CTCs	Chr 5-region27	2	GM2A	Chr 5	150591711	150650001
Ebright et al. CTCs	Chr 5-region27	2	SLC36A2	Chr 5	150694539	150727151
Ebright et al. CTCs	Chr 5-region27	2	SPARC	Chr 5	151040657	151066726
Ebright et al. CTCs	Chr 5-region27	2	ATOX1	Chr 5	151121877	151152093
Ebright et al. CTCs	Chr 5-region27	2	G3BP1	Chr 5	151150606	151192346
Ebright et al. CTCs	Chr 5-region27	2	FAM114A2	Chr 5	153369688	153418496
Ebright et al. CTCs	Chr 5-region27	2	MFAP3	Chr 5	153418466	153600038
Ebright et al. CTCs	Chr 5-region27	2	GALNT10	Chr 5	153570290	153800544
Ebright et al. CTCs	Chr 5-region27	2	SAP30L	Chr 5	153825517	153840614
Ebright et al. CTCs	Chr 5-region27	2	LARP1	Chr 5	154092462	154197167
Ebright et al. CTCs	Chr 5-region27	2	FAXDC2	Chr 5	154198051	154238812
Ebright et al. CTCs	Chr 5-region27	2	CNOT8	Chr 5	154237113	154256353
Ebright et al. CTCs	Chr 5-region27	2	GEMIN5	Chr 5	154266976	154317769
Ebright et al. CTCs	Chr 5-region27	2	MRPL22	Chr 5	154320630	154348971
Ebright et al. CTCs	Chr 5-region27	2	HAVCR2	Chr 5	156512843	156569880
Ebright et al. CTCs	Chr 5-region27	2	MED7	Chr 5	156564423	156586030
Ebright et al. CTCs	Chr 5-region27	2	ITK	Chr 5	156569944	156682201
Ebright et al. CTCs	Chr 5-region27	2	CYFIP2	Chr 5	156693089	156822606
Ebright et al. CTCs	Chr 5-region27	2	THG1L	Chr 5	157158205	157168456
Ebright et al. CTCs	Chr 5-region27	2	LSM11	Chr 5	157170703	157187717
Ebright et al. CTCs	Chr 5-region27	2	CLINT1	Chr 5	157212751	157286183
Ebright et al. CTCs	Chr 5-region27	2	RNF145	Chr 5	158584417	158637061
Ebright et al. CTCs	Chr 5-region27	2	UBLCP1	Chr 5	158690089	158713044
Ebright et al. CTCs	Chr 5-region27	2	TTC1	Chr 5	159436120	159492550
Ebright et al. CTCs	Chr 5-region27	2	PWWP2A	Chr 5	159488808	159546430
Ebright et al. CTCs	Chr 5-region27	2	CCNJL	Chr 5	159678659	159772403
Ebright et al. CTCs	Chr 5-region27	2	SLU7	Chr 5	159828648	159848718
Ebright et al. CTCs	Chr 5-region27	2	PTTG1	Chr 5	159848829	159855748
Ebright et al. CTCs	Chr 5-region27	2	MIR146A	Chr 5	159895275	159914433
Ebright et al. CTCs	Chr 5-region27	2	ATP10B	Chr 5	159990127	160279221
Ebright et al. CTCs	Chr 5-region27	2	CCNG1	Chr 5	162864575	162873157
Ebright et al. CTCs	Chr 5-region27	2	NUDCD2	Chr 5	162873532	162887146
Ebright et al. CTCs	Chr 5-region27	2	HMMR	Chr 5	162887209	162918947
Ebright et al. CTCs	Chr 5-region27	2	MAT2B	Chr 5	162930120	162946342
Ebright et al. CTCs	Chr 5-region27	2	WWC1	Chr 5	167718656	167899308
Ebright et al. CTCs	Chr 5-region27	2	RARS	Chr 5	167913450	167946304
Ebright et al. CTCs	Chr 5-region27	2	PANK3	Chr 5	167975500	168006605
Ebright et al. CTCs	Chr 5-region27	2	SPDL1	Chr 5	169010638	169031782
Ebright et al. CTCs	Chr 5-region27	2	LCP2	Chr 5	169673241	169725231
Ebright et al. CTCs	Chr 5-region27	2	KCNMB1	Chr 5	169801675	169816681
Ebright et al. CTCs	Chr 5-region27	2	GABRP	Chr 5	170190354	170241051
Ebright et al. CTCs	Chr 5-region27	2	RANBP17	Chr 5	170288874	170727019
Ebright et al. CTCs	Chr 5-region27	2	NPM1	Chr 5	170814120	170838141
Ebright et al. CTCs	Chr 5-region27	2	FBXW11	Chr 5	171288553	171433877
Ebright et al. CTCs	Chr 5-region27	2	STK10	Chr 5	171469077	171615390
Ebright et al. CTCs	Chr 5-region27	2	UBTD2	Chr 5	171636644	171711075
Ebright et al. CTCs	Chr 5-region27	2	SH3PXD2B	Chr 5	171752185	171881527
Ebright et al. CTCs	Chr 5-region27	2	NEURL1B	Chr 5	172068269	172118543
Ebright et al. CTCs	Chr 5-region27	2	DUSP1	Chr 5	172195093	172198198
Ebright et al. CTCs	Chr 5-region27	2	ERGIC1	Chr 5	172261278	172379688
Ebright et al. CTCs	Chr 5-region27	2	RPL26L1	Chr 5	172385732	172396774
Ebright et al. CTCs	Chr 5-region27	2	ATP6V0E1	Chr 5	172410760	172462448
Ebright et al. CTCs	Chr 5-region27	2	CREBRF	Chr 5	172483355	172566291
Ebright et al. CTCs	Chr 5-region27	2	BNIP1	Chr 5	172571445	172591390
Ebright et al. CTCs	Chr 5-region27	2	STC2	Chr 5	172741716	172756506
Ebright et al. CTCs	Chr 5-region27	2	BOD1	Chr 5	173034517	173043663
Ebright et al. CTCs	Chr 5-region27	2	CPEB4	Chr 5	173315283	173388979
Ebright et al. CTCs	Chr 5-region27	2	SFXN1	Chr 5	174904065	174956745
Ebright et al. CTCs	Chr 5-region27	2	FAM153B	Chr 5	175487692	175559261
Ebright et al. CTCs	Chr 5-region27	2	KIAA1191	Chr 5	175773064	175788971
Ebright et al. CTCs	Chr 5-region27	2	ARL10	Chr 5	175792471	175828866
Ebright et al. CTCs	Chr 5-region27	2	NOP16	Chr 5	175810949	175815976
Ebright et al. CTCs	Chr 5-region27	2	HIGD2A	Chr 5	175815748	175816772
Ebright et al. CTCs	Chr 6-region29	4	DUSP22	Chr 6	291630	351355
Ebright et al. CTCs	Chr 6-region29	4	EXOC2	Chr 6	485133	693117
Ebright et al. CTCs	Chr 6-region29	4	GMDS	Chr 6	1624041	2245926
Ebright et al. CTCs	Chr 6-region29	4	MYLK4	Chr 6	2663863	2751200
Ebright et al. CTCs	Chr 6-region29	4	WRNIP1	Chr 6	2765648	2787186
Ebright et al. CTCs	Chr 6-region29	4	SERPINB1	Chr 6	2832566	2842240
Ebright et al. CTCs	Chr 6-region29	4	SERPINB9	Chr 6	2887500	2903514
Ebright et al. CTCs	Chr 6-region29	4	SERPINB6	Chr 6	2948393	2972090
Ebright et al. CTCs	Chr 6-region29	4	LINC01011	Chr 6	2988201	2991407
Ebright et al. CTCs	Chr 6-region29	4	NQO2	Chr 6	2988221	3019996
Ebright et al. CTCs	Chr 6-region29	4	RIPK1	Chr 6	3064225	3115421
Ebright et al. CTCs	Chr 6-region29	4	BPHL	Chr 6	3118608	3153812
Ebright et al. CTCs	Chr 6-region29	4	TUBB2A	Chr 6	3153903	3157760
Ebright et al. CTCs	Chr 6-region29	4	PSMG4	Chr 6	3231637	3303607
Ebright et al. CTCs	Chr 6-region29	4	SLC22A23	Chr 6	3269196	3457256
Ebright et al. CTCs	Chr 6-region29	4	PXDC1	Chr 6	3722848	3752260
Ebright et al. CTCs	Chr 6-region29	4	PRPF4B	Chr 6	4021501	4065217
Ebright et al. CTCs	Chr 6-region29	4	ECI2	Chr 6	4115923	4135831
Ebright et al. CTCs	Chr 6-region29	4	CDYL	Chr 6	4706393	4955785
Ebright et al. CTCs	Chr 6-region29	4	LYRM4	Chr 6	5102827	5261172
Ebright et al. CTCs	Chr 6-region29	4	FARS2	Chr 6	5261277	5771813
Ebright et al. CTCs	Chr 6-region29	4	F13A1	Chr 6	6144318	6321246
Ebright et al. CTCs	Chr 6-region29	4	RREB1	Chr 6	7107830	7252213
Ebright et al. CTCs	Chr 6-region29	4	SSR1	Chr 6	7268539	7347679
Ebright et al. CTCs	Chr 6-region29	4	RIOK1	Chr 6	7389729	7418270
Ebright et al. CTCs	Chr 6-region29	4	DSP	Chr 6	7541808	7586950
Ebright et al. CTCs	Chr 6-region29	4	SNRNP48	Chr 6	7590432	7612200
Ebright et al. CTCs	Chr 6-region29	4	BMP6	Chr 6	7727030	7881655
Ebright et al. CTCs	Chr 6-region29	4	TXNDC5	Chr 6	7881483	8026646
Ebright et al. CTCs	Chr 6-region29	4	BLOC1S5	Chr 6	8013800	8064647
Ebright et al. CTCs	Chr 6-region29	4	EEF1E1	Chr 6	8073593	8102811
Ebright et al. CTCs	Chr 6-region29	4	SLC35B3	Chr 6	8413301	8435794
Ebright et al. CTCs	Chr 6-region29	4	TFAP2A	Chr 6	10393419	10419892
Ebright et al. CTCs	Chr 6-region29	4	GCNT2	Chr 6	10492456	10629601
Ebright et al. CTCs	Chr 6-region29	4	PAK1IP1	Chr 6	10694928	10710015
Ebright et al. CTCs	Chr 6-region29	4	TMEM14C	Chr 6	10723148	10731362
Ebright et al. CTCs	Chr 6-region29	4	TMEM14B	Chr 6	10747992	10852986
Ebright et al. CTCs	Chr 6-region29	4	SMIM13	Chr 6	11094266	11138964
Ebright et al. CTCs	Chr 6-region29	4	NEDD9	Chr 6	11183531	11382581
Ebright et al. CTCs	Chr 6-region29	4	TMEM170B	Chr 6	11537938	11583757
Ebright et al. CTCs	Chr 6-region29	4	HIVEP1	Chr 6	12008995	12165232
Ebright et al. CTCs	Chr 6-region29	4	EDN1	Chr 6	12290596	12297427
Ebright et al. CTCs	Chr 6-region29	4	PHACTR1	Chr 6	12717893	13288645
Ebright et al. CTCs	Chr 6-region29	4	TBC1D7	Chr 6	13266774	13328815
Ebright et al. CTCs	Chr 6-region29	4	GFOD1	Chr 6	13358062	13487894
Ebright et al. CTCs	Chr 6-region29	4	AL583828.1	Chr 6	13469513	13486415
Ebright et al. CTCs	Chr 6-region29	4	SIRT5	Chr 6	13574816	13614790
Ebright et al. CTCs	Chr 6-region29	4	NOL7	Chr 6	13615559	13632971
Ebright et al. CTCs	Chr 6-region29	4	AL441883.1	Chr 6	13615728	13621126
Ebright et al. CTCs	Chr 6-region29	4	RANBP9	Chr 6	13621730	13711796
Ebright et al. CTCs	Chr 6-region29	4	MCUR1	Chr 6	13786789	13814800
Ebright et al. CTCs	Chr 6-region29	4	CD83	Chr 6	14117872	14137149
Ebright et al. CTCs	Chr 6-region29	4	JARID2	Chr 6	15246527	15522252
Ebright et al. CTCs	Chr 6-region29	4	DTNBP1	Chr 6	15523032	15663289
Ebright et al. CTCs	Chr 6-region29	4	MYLIP	Chr 6	16129356	16148479
Ebright et al. CTCs	Chr 6-region29	4	GMPR	Chr 6	16238811	16295780
Ebright et al. CTCs	Chr 6-region29	4	ATXN1	Chr 6	16299343	16761722
Ebright et al. CTCs	Chr 6-region29	4	STMND1	Chr 6	17102489	17131603
Ebright et al. CTCs	Chr 6-region29	4	FAM8A1	Chr 6	17600586	17611950
Ebright et al. CTCs	Chr 6-region29	4	NUP153	Chr 6	17615269	17706656
Ebright et al. CTCs	Chr 6-region29	4	KIF13A	Chr 6	17759414	17987854
Ebright et al. CTCs	Chr 6-region29	4	TPMT	Chr 6	18128542	18155305
Ebright et al. CTCs	Chr 6-region29	4	KDM1B	Chr 6	18155560	18224084
Ebright et al. CTCs	Chr 6-region29	4	DEK	Chr 6	18224099	18265054
Ebright et al. CTCs	Chr 6-region29	4	RNF144B	Chr 6	18368779	18469105
Ebright et al. CTCs	Chr 6-region29	4	MBOAT1	Chr 6	20100935	20212670
Ebright et al. CTCs	Chr 6-region29	4	E2F3	Chr 6	20402398	20493941
Ebright et al. CTCs	Chr 6-region29	4	CDKAL1	Chr 6	20534688	21232635
Ebright et al. CTCs	Chr 6-region29	4	SOX4	Chr 6	21593972	21598847
Ebright et al. CTCs	Chr 6-region29	4	CASC15	Chr 6	21665003	22214734
Ebright et al. CTCs	Chr 6-region29	4	NRSN1	Chr 6	24126350	24155128
Ebright et al. CTCs	Chr 6-region29	4	MRS2	Chr 6	24403153	24425810
Ebright et al. CTCs	Chr 6-region29	4	ALDH5A1	Chr 6	24495080	24537435
Ebright et al. CTCs	Chr 6-region29	4	TDP2	Chr 6	24650205	24667261
Ebright et al. CTCs	Chr 6-region29	4	ACOT13	Chr 6	24667263	24705293
Ebright et al. CTCs	Chr 6-region29	4	C6orf62	Chr 6	24705089	24721064
Ebright et al. CTCs	Chr 6-region29	4	GMNN	Chr 6	24775159	24786327
Ebright et al. CTCs	Chr 6-region29	4	FAM65B	Chr 6	24797601	25042238
Ebright et al. CTCs	Chr 6-region29	4	LRRC16A	Chr 6	25279306	25620758
Ebright et al. CTCs	Chr 6-region29	4	TRIM38	Chr 6	25963030	25987384
Ebright et al. CTCs	Chr 6-region29	4	U91328.19	Chr 6	25992890	26002003
Ebright et al. CTCs	Chr 6-region29	4	HIST1H3A	Chr 6	26020718	26021186
Ebright et al. CTCs	Chr 6-region29	4	HIST1H1C	Chr 6	26055968	26056699
Ebright et al. CTCs	Chr 6-region29	4	HFE	Chr 6	26087509	26098571
Ebright et al. CTCs	Chr 6-region29	4	HIST1H4C	Chr 6	26104104	26104518
Ebright et al. CTCs	Chr 6-region29	4	HIST1H2BC	Chr 6	26115101	26124154
Ebright et al. CTCs	Chr 6-region29	4	HIST1H2AC	Chr 6	26124373	26139344
Ebright et al. CTCs	Chr 6-region29	4	HIST1H2BD	Chr 6	26158349	26171577
Ebright et al. CTCs	Chr 6-region29	4	HIST1H4D	Chr 6	26188938	26189304
Ebright et al. CTCs	Chr 6-region29	4	HIST1H3D	Chr 6	26197068	26199521
Ebright et al. CTCs	Chr 6-region29	4	HIST1H2AD	Chr 6	26199079	26199471
Ebright et al. CTCs	Chr 6-region29	4	HIST1H4E	Chr 6	26204858	26206266
Ebright et al. CTCs	Chr 6-region29	4	HIST1H2BG	Chr 6	26216428	26216872
Ebright et al. CTCs	Chr 6-region29	4	HIST1H2AE	Chr 6	26217165	26217711
Ebright et al. CTCs	Chr 6-region29	4	HIST1H2BH	Chr 6	26251879	26252303
Ebright et al. CTCs	Chr 6-region29	4	HIST1H3G	Chr 6	26271146	26271612
Ebright et al. CTCs	Chr 6-region29	4	HIST1H4H	Chr 6	26281283	26285762
Ebright et al. CTCs	Chr 6-region29	4	BTN3A2	Chr 6	26365387	26378546
Ebright et al. CTCs	Chr 6-region29	4	BTN2A2	Chr 6	26383324	26395102
Ebright et al. CTCs	Chr 6-region29	4	BTN3A1	Chr 6	26402465	26415444
Ebright et al. CTCs	Chr 6-region29	4	BTN3A3	Chr 6	26440700	26453643
Ebright et al. CTCs	Chr 6-region29	4	BTN2A1	Chr 6	26458150	26476849
Ebright et al. CTCs	Chr 6-region29	4	HCG11	Chr 6	26522076	26526807
Ebright et al. CTCs	Chr 6-region29	4	HMGN4	Chr 6	26538633	26546482
Ebright et al. CTCs	Chr 6-region29	4	ABT1	Chr 6	26597180	26600278
Ebright et al. CTCs	Chr 6-region29	4	HIST1H2BJ	Chr 6	27093676	27100541
Ebright et al. CTCs	Chr 6-region29	4	HIST1H2AG	Chr 6	27100832	27103070
Ebright et al. CTCs	Chr 6-region29	4	HIST1H2BK	Chr 6	27106073	27114619
Ebright et al. CTCs	Chr 6-region29	4	HIST1H4I	Chr 6	27107076	27108418
Ebright et al. CTCs	Chr 6-region29	4	PRSS16	Chr 6	27215480	27224403
Ebright et al. CTCs	Chr 6-region29	4	HIST1H3H	Chr 6	27777842	27778314
Ebright et al. CTCs	Chr 6-region29	4	HIST1H2BN	Chr 6	27806323	27823487
Ebright et al. CTCs	Chr 6-region29	4	HIST1H2AM	Chr 6	27860477	27860963
Ebright et al. CTCs	Chr 6-region29	4	HIST1H2BO	Chr 6	27861203	27861669
Ebright et al. CTCs	Chr 6-region29	4	OR2B2	Chr 6	27878963	27880174
Ebright et al. CTCs	Chr 6-region29	4	OR2B6	Chr 6	27925019	27925960
Ebright et al. CTCs	Chr 6-region29	4	ZNF165	Chr 6	28048753	28057341
Ebright et al. CTCs	Chr 6-region29	4	ZSCAN16	Chr 6	28092338	28097860
Ebright et al. CTCs	Chr 6-region29	4	ZKSCAN8	Chr 6	28109688	28127250
Ebright et al. CTCs	Chr 6-region29	4	ZSCAN9	Chr 6	28192664	28201260
Ebright et al. CTCs	Chr 6-region29	4	PGBD1	Chr 6	28249314	28270326
Ebright et al. CTCs	Chr 6-region29	4	ZKSCAN3	Chr 6	28317691	28336947
Ebright et al. CTCs	Chr 6-region29	4	TRIM27	Chr 6	28870779	28891766
Ebright et al. CTCs	Chr 6-region29	4	HCG15	Chr 6	28953980	28955261
Ebright et al. CTCs	Chr 6-region31	2	STK19	Chr 6	31938868	31950598
Ebright et al. CTCs	Chr 6-region31	2	C4A	Chr 6	31949801	31970458
Ebright et al. CTCs	Chr 6-region31	2	C4B	Chr 6	31982539	32003195
Ebright et al. CTCs	Chr 6-region31	2	CYP21A2	Chr 6	32006042	32009447
Ebright et al. CTCs	Chr 6-region31	2	TNXB	Chr 6	32008931	32083111
Ebright et al. CTCs	Chr 6-region31	2	ATF6B	Chr 6	32065953	32096030
Ebright et al. CTCs	Chr 6-region31	2	FKBPL	Chr 6	32096484	32098068
Ebright et al. CTCs	Chr 6-region31	2	PPT2	Chr 6	32121218	32134011
Ebright et al. CTCs	Chr 6-region31	2	EGFL8	Chr 6	32132360	32136058
Ebright et al. CTCs	Chr 6-region31	2	AGPAT1	Chr 6	32135989	32145873
Ebright et al. CTCs	Chr 6-region31	2	RNF5	Chr 6	32146131	32151930
Ebright et al. CTCs	Chr 6-region31	2	AGER	Chr 6	32148745	32152101
Ebright et al. CTCs	Chr 6-region31	2	PBX2	Chr 6	32152512	32157963
Ebright et al. CTCs	Chr 6-region31	2	GPSM3	Chr 6	32158543	32163300
Ebright et al. CTCs	Chr 6-region31	2	PSMB8	Chr 6	32808494	32812480
Ebright et al. CTCs	Chr 6-region31	2	TAPSAR1	Chr 6	32811863	32814272
Ebright et al. CTCs	Chr 6-region31	2	PSMB9	Chr 6	32811913	32827362
Ebright et al. CTCs	Chr 6-region31	2	TAP1	Chr 6	32812986	32821755
Ebright et al. CTCs	Chr 6-region31	2	BRD2	Chr 6	32936437	32949282
Ebright et al. CTCs	Chr 6-region31	2	RXRB	Chr 6	33161365	33168630
Ebright et al. CTCs	Chr 6-region31	2	SLC39A7	Chr 6	33168222	33172216
Ebright et al. CTCs	Chr 6-region31	2	HSD17B8	Chr 6	33172419	33174608
Ebright et al. CTCs	Chr 6-region31	2	RING1	Chr 6	33176272	33180499
Ebright et al. CTCs	Chr 6-region31	2	HCG25	Chr 6	33217311	33222766
Ebright et al. CTCs	Chr 6-region31	2	VPS52	Chr 6	33218049	33239824
Ebright et al. CTCs	Chr 6-region31	2	RPS18	Chr 6	33239787	33244287
Ebright et al. CTCs	Chr 6-region31	2	B3GALT4	Chr 6	33244917	33252609
Ebright et al. CTCs	Chr 6-region31	2	WDR46	Chr 6	33246885	33257304
Ebright et al. CTCs	Chr 6-region31	2	RGL2	Chr 6	33259431	33267101
Ebright et al. CTCs	Chr 6-region31	2	TAPBP	Chr 6	33267471	33282164
Ebright et al. CTCs	Chr 6-region31	2	ZBTB22	Chr 6	33282183	33285719
Ebright et al. CTCs	Chr 6-region31	2	DAXX	Chr 6	33286335	33297046
Ebright et al. CTCs	Chr 6-region31	2	PHF1	Chr 6	33378176	33384230
Ebright et al. CTCs	Chr 6-region31	2	CUTA	Chr 6	33384219	33386094
Ebright et al. CTCs	Chr 6-region31	2	SYNGAP1	Chr 6	33387847	33421466
Ebright et al. CTCs	Chr 6-region31	2	BAK1	Chr 6	33540329	33548019
Ebright et al. CTCs	Chr 6-region31	2	ITPR3	Chr 6	33588142	33664351
Ebright et al. CTCs	Chr 6-region31	2	UQCC2	Chr 6	33662070	33679504
Ebright et al. CTCs	Chr 6-region31	2	LEMD2	Chr 6	33738979	33756913
Ebright et al. CTCs	Chr 6-region31	2	HMGA1	Chr 6	34204650	34214008
Ebright et al. CTCs	Chr 6-region31	2	C6orf1	Chr 6	34214157	34217247
Ebright et al. CTCs	Chr 6-region31	2	NUDT3	Chr 6	34247456	34360451
Ebright et al. CTCs	Chr 6-region31	2	RPS10	Chr 6	34385231	34393902
Ebright et al. CTCs	Chr 6-region31	2	SPDEF	Chr 6	34505579	34524110
Ebright et al. CTCs	Chr 6-region31	2	C6orf106	Chr 6	34555065	34664636
Ebright et al. CTCs	Chr 6-region31	2	SNRPC	Chr 6	34725183	34741571
Ebright et al. CTCs	Chr 6-region31	2	UHRF1BP1	Chr 6	34759857	34850915
Ebright et al. CTCs	Chr 6-region31	2	TAF11	Chr 6	34845555	34855866
Ebright et al. CTCs	Chr 6-region31	2	ANKS1A	Chr 6	34857042	35059179
Ebright et al. CTCs	Chr 6-region31	2	TCP11	Chr 6	35085848	35116387
Ebright et al. CTCs	Chr 6-region31	2	ZNF76	Chr 6	35226686	35263762
Ebright et al. CTCs	Chr 6-region31	2	DEF6	Chr 6	35265595	35289548
Ebright et al. CTCs	Chr 6-region31	2	PPARD	Chr 6	35310335	35395968
Ebright et al. CTCs	Chr 6-region31	2	FANCE	Chr 6	35420138	35434880
Ebright et al. CTCs	Chr 6-region31	2	RPL10A	Chr 6	35436185	35438562
Ebright et al. CTCs	Chr 6-region31	2	FKBP5	Chr 6	35541362	35696360
Ebright et al. CTCs	Chr 6-region33	4	ZFAND3	Chr 6	37787275	38122400
Ebright et al. CTCs	Chr 6-region33	4	BTBD9	Chr 6	38136227	38607924
Ebright et al. CTCs	Chr 6-region33	4	GLO1	Chr 6	38643701	38670917
Ebright et al. CTCs	Chr 6-region33	4	SAYSD1	Chr 6	39071840	39082965
Ebright et al. CTCs	Chr 6-region33	4	KCNK5	Chr 6	39156749	39197226
Ebright et al. CTCs	Chr 6-region33	4	KIF6	Chr 6	39297766	39693181
Ebright et al. CTCs	Chr 6-region33	4	OARD1	Chr 6	41001366	41065526
Ebright et al. CTCs	Chr 6-region33	4	NFYA	Chr 6	41040684	41067715
Ebright et al. CTCs	Chr 6-region33	4	TREML1	Chr 6	41117080	41122075
Ebright et al. CTCs	Chr 6-region33	4	TREML2	Chr 6	41158015	41168932
Ebright et al. CTCs	Chr 6-region33	4	FOXP4	Chr 6	41514164	41570122
Ebright et al. CTCs	Chr 6-region33	4	PGC	Chr 6	41704449	41721847
Ebright et al. CTCs	Chr 6-region33	4	PRICKLE4	Chr 6	41748087	41757879
Ebright et al. CTCs	Chr 6-region33	4	TOMM6	Chr 6	41755400	41757636
Ebright et al. CTCs	Chr 6-region33	4	USP49	Chr 6	41757634	41863099
Ebright et al. CTCs	Chr 6-region33	4	MED20	Chr 6	41873092	41888877
Ebright et al. CTCs	Chr 6-region33	4	BYSL	Chr 6	41888926	41900784
Ebright et al. CTCs	Chr 6-region33	4	CCND3	Chr 6	41902671	42018095
Ebright et al. CTCs	Chr 6-region33	4	TAF8	Chr 6	42018251	42055199
Ebright et al. CTCs	Chr 6-region33	4	C6orf132	Chr 6	42068856	42110357
Ebright et al. CTCs	Chr 6-region33	4	MRPS10	Chr 6	42174539	42185603
Ebright et al. CTCs	Chr 6-region33	4	UBR2	Chr 6	42531800	42661242
Ebright et al. CTCs	Chr 6-region33	4	TBCC	Chr 6	42712219	42714558
Ebright et al. CTCs	Chr 6-region33	4	GLTSCR1L	Chr 6	42749765	42836298
Ebright et al. CTCs	Chr 6-region33	4	RPL7L1	Chr 6	42847356	42857663
Ebright et al. CTCs	Chr 6-region33	4	C6orf226	Chr 6	42858005	42858554
Ebright et al. CTCs	Chr 6-region33	4	PTCRA	Chr 6	42883727	42893573
Ebright et al. CTCs	Chr 6-region33	4	CNPY3	Chr 6	42896938	42907025
Ebright et al. CTCs	Chr 6-region33	4	PEX6	Chr 6	42931608	42946958
Ebright et al. CTCs	Chr 6-region33	4	PPP2R5D	Chr 6	42952237	42980080
Ebright et al. CTCs	Chr 6-region33	4	MEA1	Chr 6	42979832	42981706
Ebright et al. CTCs	Chr 6-region33	4	KLHDC3	Chr 6	42981951	42989036
Ebright et al. CTCs	Chr 6-region33	4	RRP36	Chr 6	42989383	43001894
Ebright et al. CTCs	Chr 6-region33	4	CUL7	Chr 6	43005355	43021683
Ebright et al. CTCs	Chr 6-region33	4	KLC4	Chr 6	43008515	43042837
Ebright et al. CTCs	Chr 6-region33	4	MRPL2	Chr 6	43021767	43027544
Ebright et al. CTCs	Chr 6-region33	4	PTK7	Chr 6	43044006	43129457
Ebright et al. CTCs	Chr 6-region33	4	SRF	Chr 6	43139037	43149243
Ebright et al. CTCs	Chr 6-region33	4	CUL9	Chr 6	43149913	43192325
Ebright et al. CTCs	Chr 6-region33	4	DNPH1	Chr 6	43193367	43197222
Ebright et al. CTCs	Chr 6-region33	4	ZNF318	Chr 6	43274872	43337216
Ebright et al. CTCs	Chr 6-region33	4	ABCC10	Chr 6	43395104	43418168
Ebright et al. CTCs	Chr 6-region33	4	TJAP1	Chr 6	43445261	43474294
Ebright et al. CTCs	Chr 6-region33	4	POLR1C	Chr 6	43477440	43497323
Ebright et al. CTCs	Chr 6-region33	4	YIPF3	Chr 6	43479565	43484728
Ebright et al. CTCs	Chr 6-region33	4	XPO5	Chr 6	43490072	43543812
Ebright et al. CTCs	Chr 6-region33	4	POLH	Chr 6	43543887	43586701
Ebright et al. CTCs	Chr 6-region33	4	GTPBP2	Chr 6	43573053	43596899
Ebright et al. CTCs	Chr 6-region33	4	MAD2L1BP	Chr 6	43597277	43608689
Ebright et al. CTCs	Chr 6-region33	4	RSPH9	Chr 6	43612783	43640336
Ebright et al. CTCs	Chr 6-region33	4	MRPS18A	Chr 6	43639040	43655528
Ebright et al. CTCs	Chr 6-region33	4	VEGFA	Chr 6	43737921	43754224
Ebright et al. CTCs	Chr 6-region33	4	MRPL14	Chr 6	44081194	44095194
Ebright et al. CTCs	Chr 6-region35	2	ZNF451	Chr 6	56951642	57035105
Ebright et al. CTCs	Chr 6-region35	2	BAG2	Chr 6	57037124	57054631
Ebright et al. CTCs	Chr 6-region35	2	PTP4A1	Chr 6	64231666	64293492
Ebright et al. CTCs	Chr 6-region35	2	PHF3	Chr 6	64345725	64489229
Ebright et al. CTCs	Chr 6-region35	2	EYS	Chr 6	64429876	66417118
Ebright et al. CTCs	Chr 6-region35	2	LMBRD1	Chr 6	70385694	70507003
Ebright et al. CTCs	Chr 6-region35	2	COL19A1	Chr 6	70576463	70919679
Ebright et al. CTCs	Chr 6-region35	2	FAM135A	Chr 6	71122644	71270877
Ebright et al. CTCs	Chr 6-region35	2	C6orf57	Chr 6	71276620	71299272
Ebright et al. CTCs	Chr 6-region35	2	SMAP1	Chr 6	71377479	71571718
Ebright et al. CTCs	Chr 6-region35	2	OGFRL1	Chr 6	71998506	72018653
Ebright et al. CTCs	Chr 6-region35	2	LINC00472	Chr 6	72054047	72130472
Ebright et al. CTCs	Chr 6-region35	2	RIMS1	Chr 6	72596406	73112845
Ebright et al. CTCs	Chr 6-region35	2	KHDC1	Chr 6	73951037	74020088
Ebright et al. CTCs	Chr 6-region35	2	MB21D1	Chr 6	74123238	74161999
Ebright et al. CTCs	Chr 6-region35	2	MTO1	Chr 6	74171301	74218959
Ebright et al. CTCs	Chr 6-region35	2	EEF1A1	Chr 6	74225473	74233520
Ebright et al. CTCs	Chr 6-region35	2	SLC17A5	Chr 6	74303102	74363878
Ebright et al. CTCs	Chr 6-region35	2	CD109	Chr 6	74405508	74538040
Ebright et al. CTCs	Chr 6-region35	2	COL12A1	Chr 6	75794042	75915767
Ebright et al. CTCs	Chr 6-region35	2	COX7A2	Chr 6	75947391	75960039
Ebright et al. CTCs	Chr 6-region35	2	TMEM30A	Chr 6	75962640	75994684
Ebright et al. CTCs	Chr 6-region35	2	SENP6	Chr 6	76311225	76427997
Ebright et al. CTCs	Chr 6-region35	2	MYO6	Chr 6	76458909	76629254
Ebright et al. CTCs	Chr 6-region35	2	PHIP	Chr 6	79645584	79787953
Ebright et al. CTCs	Chr 6-region35	2	HMGN3	Chr 6	79910962	79944406
Ebright et al. CTCs	Chr 6-region35	2	LCA5	Chr 6	80194708	80247175
Ebright et al. CTCs	Chr 6-region35	2	SH3BGRL2	Chr 6	80341000	80413372
Ebright et al. CTCs	Chr 6-region35	2	TTK	Chr 6	80713604	80752244
Ebright et al. CTCs	Chr 6-region35	2	FAM46A	Chr 6	82201156	82462491
Ebright et al. CTCs	Chr 6-region35	2	IBTK	Chr 6	82879700	82957471
Ebright et al. CTCs	Chr 6-region35	2	TPBG	Chr 6	83072923	83080545
Ebright et al. CTCs	Chr 6-region35	2	DOPEY1	Chr 6	83777385	83881069
Ebright et al. CTCs	Chr 6-region35	2	PGM3	Chr 6	83870869	83903655
Ebright et al. CTCs	Chr 6-region35	2	RWDD2A	Chr 6	83903098	83908651
Ebright et al. CTCs	Chr 6-region35	2	ME1	Chr 6	83920108	84140797
Ebright et al. CTCs	Chr 6-region35	2	CYB5R4	Chr 6	84569362	84677143
Ebright et al. CTCs	Chr 6-region35	2	KIAA1009	Chr 6	84833960	84937353
Ebright et al. CTCs	Chr 6-region35	2	NT5E	Chr 6	86159809	86205500
Ebright et al. CTCs	Chr 6-region35	2	SNX14	Chr 6	86215214	86303874
Ebright et al. CTCs	Chr 6-region35	2	SYNCRIP	Chr 6	86318053	86353510
Ebright et al. CTCs	Chr 6-region35	2	CGA	Chr 6	87795216	87804824
Ebright et al. CTCs	Chr 6-region35	2	ZNF292	Chr 6	87862551	87973914
Ebright et al. CTCs	Chr 6-region35	2	SMIM8	Chr 6	88032301	88052043
Ebright et al. CTCs	Chr 6-region35	2	SLC35A1	Chr 6	88180341	88222054
Ebright et al. CTCs	Chr 6-region35	2	RARS2	Chr 6	88224096	88299721
Ebright et al. CTCs	Chr 6-region35	2	ORC3	Chr 6	88299839	88377169
Ebright et al. CTCs	Chr 6-region35	2	AKIRIN2	Chr 6	88384790	88411927
Ebright et al. CTCs	Chr 6-region35	2	PNRC1	Chr 6	89790470	89794879
Ebright et al. CTCs	Chr 6-region35	2	SRSF12	Chr 6	89805678	89827800
Ebright et al. CTCs	Chr 6-region35	2	UBE2J1	Chr 6	90036344	90062567
Ebright et al. CTCs	Chr 6-region35	2	RRAGD	Chr 6	90074355	90121989
Ebright et al. CTCs	Chr 6-region35	2	ANKRD6	Chr 6	90142889	90343553
Ebright et al. CTCs	Chr 6-region35	2	LYRM2	Chr 6	90277863	90348472
Ebright et al. CTCs	Chr 6-region35	2	MDN1	Chr 6	90352218	90529442
Ebright et al. CTCs	Chr 6-region35	2	BACH2	Chr 6	90636248	91006627
Ebright et al. CTCs	Chr 6-region35	2	MAP3K7	Chr 6	91223292	91296764
Ebright et al. CTCs	Chr 6-region35	2	UFL1	Chr 6	96969471	97003152
Ebright et al. CTCs	Chr 6-region35	2	NDUFAF4	Chr 6	97337189	97345757
Ebright et al. CTCs	Chr 6-region35	2	MMS22L	Chr 6	97590037	97731093
Ebright et al. CTCs	Chr 6-region35	2	FBXL4	Chr 6	99316420	99395849
Ebright et al. CTCs	Chr 6-region35	2	FAXC	Chr 6	99719045	99797938
Ebright et al. CTCs	Chr 6-region35	2	COQ3	Chr 6	99817276	99842080
Ebright et al. CTCs	Chr 6-region35	2	PNISR	Chr 6	99845927	99873207
Ebright et al. CTCs	Chr 6-region35	2	CCNC	Chr 6	99990256	100016849
Ebright et al. CTCs	Chr 6-region35	2	ASCC3	Chr 6	100956070	101329248
Ebright et al. CTCs	Chr 6-region35	2	PREP	Chr 6	105725440	105850959
Ebright et al. CTCs	Chr 6-region35	2	ATG5	Chr 6	106632351	106773666
Ebright et al. CTCs	Chr 7-region37	4	AC093627.8	Chr 7	77038	80418
Ebright et al. CTCs	Chr 7-region37	4	FAM20C	Chr 7	192969	300711
Ebright et al. CTCs	Chr 7-region37	4	PDGFA	Chr 7	536895	559933
Ebright et al. CTCs	Chr 7-region37	4	AC147651.3	Chr 7	560028	564869
Ebright et al. CTCs	Chr 7-region37	4	PRKAR1B	Chr 7	588834	767287
Ebright et al. CTCs	Chr 7-region37	4	AC147651.4	Chr 7	642822	648119
Ebright et al. CTCs	Chr 7-region37	4	HEATR2	Chr 7	766338	829190
Ebright et al. CTCs	Chr 7-region37	4	SUN1	Chr 7	855528	936072
Ebright et al. CTCs	Chr 7-region37	4	GET4	Chr 7	916189	936073
Ebright et al. CTCs	Chr 7-region37	4	COX19	Chr 7	938415	1015235
Ebright et al. CTCs	Chr 7-region37	4	C7orf50	Chr 7	1036622	1177896
Ebright et al. CTCs	Chr 7-region37	4	GPR146	Chr 7	1084212	1098897
Ebright et al. CTCs	Chr 7-region37	4	GPER1	Chr 7	1121844	1133451
Ebright et al. CTCs	Chr 7-region37	4	ZFAND2A	Chr 7	1191707	1200395
Ebright et al. CTCs	Chr 7-region37	4	MICALL2	Chr 7	1468101	1499138
Ebright et al. CTCs	Chr 7-region37	4	INTS1	Chr 7	1509913	1545489
Ebright et al. CTCs	Chr 7-region37	4	MAFK	Chr 7	1570350	1582679
Ebright et al. CTCs	Chr 7-region37	4	PSMG3	Chr 7	1606966	1610641
Ebright et al. CTCs	Chr 7-region37	4	MAD1L1	Chr 7	1855429	2272878
Ebright et al. CTCs	Chr 7-region37	4	FTSJ2	Chr 7	2273866	2281840
Ebright et al. CTCs	Chr 7-region37	4	NUDT1	Chr 7	2281857	2290781
Ebright et al. CTCs	Chr 7-region37	4	SNX8	Chr 7	2291405	2393953
Ebright et al. CTCs	Chr 7-region37	4	EIF3B	Chr 7	2393721	2420380
Ebright et al. CTCs	Chr 7-region37	4	CHST12	Chr 7	2443223	2474242
Ebright et al. CTCs	Chr 7-region37	4	AC004840.9	Chr 7	2477398	2487485
Ebright et al. CTCs	Chr 7-region37	4	BRAT1	Chr 7	2577511	2595361
Ebright et al. CTCs	Chr 7-region37	4	IQCE	Chr 7	2598632	2654368
Ebright et al. CTCs	Chr 7-region37	4	GNA12	Chr 7	2767746	2883958
Ebright et al. CTCs	Chr 7-region37	4	FOXK1	Chr 7	4683388	4811074
Ebright et al. CTCs	Chr 7-region37	4	AP5Z1	Chr 7	4815253	4833943
Ebright et al. CTCs	Chr 7-region37	4	RADIL	Chr 7	4836686	4923350
Ebright et al. CTCs	Chr 7-region37	4	RBAK	Chr 7	5085452	5109119
Ebright et al. CTCs	Chr 7-region37	4	WIPI2	Chr 7	5229819	5273457
Ebright et al. CTCs	Chr 7-region37	4	SLC29A4	Chr 7	5314000	5346501
Ebright et al. CTCs	Chr 7-region37	4	TNRC18	Chr 7	5346421	5465045
Ebright et al. CTCs	Chr 7-region37	4	FBXL18	Chr 7	5470966	5553429
Ebright et al. CTCs	Chr 7-region37	4	AC092171.4	Chr 7	5515435	5519442
Ebright et al. CTCs	Chr 7-region37	4	ACTB	Chr 7	5566782	5603415
Ebright et al. CTCs	Chr 7-region37	4	RNF216	Chr 7	5659678	5821370
Ebright et al. CTCs	Chr 7-region37	4	CCZ1	Chr 7	5938356	5965605
Ebright et al. CTCs	Chr 7-region37	4	PMS2	Chr 7	6012870	6048756
Ebright et al. CTCs	Chr 7-region37	4	AIMP2	Chr 7	6048876	6063465
Ebright et al. CTCs	Chr 7-region37	4	EIF2AK1	Chr 7	6061881	6098861
Ebright et al. CTCs	Chr 7-region37	4	USP42	Chr 7	6144515	6201195
Ebright et al. CTCs	Chr 7-region37	4	CYTH3	Chr 7	6201407	6312275
Ebright et al. CTCs	Chr 7-region37	4	FAM220A	Chr 7	6369040	6388612
Ebright et al. CTCs	Chr 7-region37	4	RAC1	Chr 7	6414154	6443608
Ebright et al. CTCs	Chr 7-region37	4	DAGLB	Chr 7	6448757	6523821
Ebright et al. CTCs	Chr 7-region37	4	KDELR2	Chr 7	6485584	6523873
Ebright et al. CTCs	Chr 7-region37	4	FLJ20306	Chr 7	6522922	6524873
Ebright et al. CTCs	Chr 7-region37	4	ZDHHC4	Chr 7	6617065	6629005
Ebright et al. CTCs	Chr 7-region37	4	C7orf26	Chr 7	6629648	6648357
Ebright et al. CTCs	Chr 7-region37	4	ZNF12	Chr 7	6728064	6746554
Ebright et al. CTCs	Chr 7-region37	4	CCZ1B	Chr 7	6833765	6866401
Ebright et al. CTCs	Chr 7-region39	4	TSPAN33	Chr 7	128784712	128808671
Ebright et al. CTCs	Chr 7-region39	4	AHCYL2	Chr 7	128864864	129070052
Ebright et al. CTCs	Chr 7-region39	4	STRIP2	Chr 7	129074274	129128240
Ebright et al. CTCs	Chr 7-region39	4	NRF1	Chr 7	129251555	129396922
Ebright et al. CTCs	Chr 7-region39	4	UBE2H	Chr 7	129470572	129592789
Ebright et al. CTCs	Chr 7-region39	4	ZC3HC1	Chr 7	129658126	129691291
Ebright et al. CTCs	Chr 7-region39	4	KLHDC10	Chr 7	129710350	129775560
Ebright et al. CTCs	Chr 7-region39	4	TMEM209	Chr 7	129804555	129847610
Ebright et al. CTCs	Chr 7-region39	4	CEP41	Chr 7	130033612	130082274
Ebright et al. CTCs	Chr 7-region39	4	MEST	Chr 7	130126012	130146133
Ebright et al. CTCs	Chr 7-region39	4	COPG2	Chr 7	130146089	130353598
Ebright et al. CTCs	Chr 7-region39	4	MKLN1	Chr 7	130794855	131181395
Ebright et al. CTCs	Chr 7-region39	4	PODXL	Chr 7	131185021	131242976
Ebright et al. CTCs	Chr 7-region39	4	AC009518.4	Chr 7	131582400	131633712
Ebright et al. CTCs	Chr 7-region39	4	CHCHD3	Chr 7	132469629	132766848
Ebright et al. CTCs	Chr 7-region39	4	EXOC4	Chr 7	132937829	133751342
Ebright et al. CTCs	Chr 7-region39	4	SLC35B4	Chr 7	133974084	134001803
Ebright et al. CTCs	Chr 7-region39	4	AKR1B1	Chr 7	134127102	134144036
Ebright et al. CTCs	Chr 7-region39	4	AKR1B15	Chr 7	134233888	134264627
Ebright et al. CTCs	Chr 7-region39	4	BPGM	Chr 7	134331560	134364565
Ebright et al. CTCs	Chr 7-region39	4	CALD1	Chr 7	134429003	134655479
Ebright et al. CTCs	Chr 7-region39	4	C7orf49	Chr 7	134777115	134855547
Ebright et al. CTCs	Chr 7-region39	4	TMEM140	Chr 7	134832824	134850967
Ebright et al. CTCs	Chr 7-region39	4	WDR91	Chr 7	134868590	134896316
Ebright et al. CTCs	Chr 7-region39	4	CNOT4	Chr 7	135046547	135194875
Ebright et al. CTCs	Chr 7-region39	4	NUP205	Chr 7	135242667	135333505
Ebright et al. CTCs	Chr 7-region39	4	C7orf73	Chr 7	135347244	135378166
Ebright et al. CTCs	Chr 7-region39	4	MTPN	Chr 7	135611509	135662101
Ebright et al. CTCs	Chr 7-region39	4	AC015987.2	Chr 7	135611542	135613214
Ebright et al. CTCs	Chr 7-region39	4	LUZP6	Chr 7	135612022	135612198
Ebright et al. CTCs	Chr 7-region39	4	DGKI	Chr 7	137065783	137531838
Ebright et al. CTCs	Chr 7-region39	4	CREB3L2	Chr 7	137559725	137686813
Ebright et al. CTCs	Chr 7-region39	4	TRIM24	Chr 7	138145079	138274738
Ebright et al. CTCs	Chr 7-region39	4	ATP6V0A4	Chr 7	138391040	138484305
Ebright et al. CTCs	Chr 7-region39	4	TMEM213	Chr 7	138482695	138522846
Ebright et al. CTCs	Chr 7-region39	4	KIAA1549	Chr 7	138516126	138666064
Ebright et al. CTCs	Chr 7-region39	4	ZC3HAV1	Chr 7	138728266	138794465
Ebright et al. CTCs	Chr 7-region39	4	TTC26	Chr 7	138818490	138876732
Ebright et al. CTCs	Chr 7-region39	4	UBN2	Chr 7	138915102	138992982
Ebright et al. CTCs	Chr 7-region39	4	C7orf55	Chr 7	139024203	139031065
Ebright et al. CTCs	Chr 7-region39	4	LUC7L2	Chr 7	139026106	139107345
Ebright et al. CTCs	Chr 7-region39	4	CLEC2L	Chr 7	139208602	139229730
Ebright et al. CTCs	Chr 7-region39	4	HIPK2	Chr 7	139246316	139477577
Ebright et al. CTCs	Chr 7-region39	4	TBXAS1	Chr 7	139476850	139720125
Ebright et al. CTCs	Chr 7-region39	4	PARP12	Chr 7	139723544	139763521
Ebright et al. CTCs	Chr 7-region39	4	SLC37A3	Chr 7	139993493	140104233
Ebright et al. CTCs	Chr 7-region39	4	MKRN1	Chr 7	140152840	140179369
Ebright et al. CTCs	Chr 7-region39	4	DENND2A	Chr 7	140218220	140373793
Ebright et al. CTCs	Chr 7-region39	4	ADCK2	Chr 7	140372953	140396061
Ebright et al. CTCs	Chr 7-region39	4	NDUFB2	Chr 7	140390577	140422590
Ebright et al. CTCs	Chr 7-region39	4	BRAF	Chr 7	140419127	140624564
Ebright et al. CTCs	Chr 7-region39	4	MRPS33	Chr 7	140705854	140715028
Ebright et al. CTCs	Chr 7-region39	4	AGK	Chr 7	141250989	141355044
Ebright et al. CTCs	Chr 7-region39	4	KIAA1147	Chr 7	141356528	141401953
Ebright et al. CTCs	Chr 7-region39	4	SSBP1	Chr 7	141438121	141487722
Ebright et al. CTCs	Chr 7-region39	4	MGAM	Chr 7	141607613	141806547
Ebright et al. CTCs	Chr 7-region39	4	MTRNR2L6	Chr 7	142374104	142375550
Ebright et al. CTCs	Chr 7-region39	4	KEL	Chr 7	142638201	142659768
Ebright et al. CTCs	Chr 7-region39	4	PIP	Chr 7	142829170	142836839
Ebright et al. CTCs	Chr 7-region39	4	GSTK1	Chr 7	142941186	142967947
Ebright et al. CTCs	Chr 7-region39	4	CASP2	Chr 7	142985308	143004789
Ebright et al. CTCs	Chr 7-region39	4	AC093673.5	Chr 7	143076785	143077588
Ebright et al. CTCs	Chr 7-region39	4	ZYX	Chr 7	143078173	143088204
Ebright et al. CTCs	Chr 7-region39	4	EPHA1	Chr 7	143087382	143105985
Ebright et al. CTCs	Chr 7-region39	4	FAM115C	Chr 7	143318043	143427502
Ebright et al. CTCs	Chr 7-region39	4	FAM115A	Chr 7	143548468	143599291
Ebright et al. CTCs	Chr 7-region39	4	ARHGEF35	Chr 7	143883176	143991230
Ebright et al. CTCs	Chr 7-region39	4	CTAGE8	Chr 7	143963794	143966381
Ebright et al. CTCs	Chr 7-region39	4	ARHGEF5	Chr 7	144052381	144077725
Ebright et al. CTCs	Chr 7-region39	4	CNTNAP2	Chr 7	145813453	148118090
Ebright et al. CTCs	Chr 7-region39	4	CUL1	Chr 7	148395006	148498128
Ebright et al. CTCs	Chr 7-region39	4	EZH2	Chr 7	148504475	148581413
Ebright et al. CTCs	Chr 7-region39	4	PDIA4	Chr 7	148700154	148725733
Ebright et al. CTCs	Chr 7-region39	4	ZNF425	Chr 7	148799876	148823438
Ebright et al. CTCs	Chr 7-region39	4	ZNF398	Chr 7	148823508	148880116
Ebright et al. CTCs	Chr 7-region39	4	ZNF282	Chr 7	148892577	148923339
Ebright et al. CTCs	Chr 7-region39	4	ZNF212	Chr 7	148936742	148952700
Ebright et al. CTCs	Chr 7-region39	4	ZNF783	Chr 7	148959262	148994393
Ebright et al. CTCs	Chr 7-region39	4	ZNF746	Chr 7	149169885	149194908
Ebright et al. CTCs	Chr 7-region39	4	ZNF862	Chr 7	149535456	149564568
Ebright et al. CTCs	Chr 7-region39	4	ATP6V0E2	Chr 7	149570057	149577784
Ebright et al. CTCs	Chr 7-region39	4	LRRC61	Chr 7	150019728	150035239
Ebright et al. CTCs	Chr 7-region39	4	REPIN1	Chr 7	150065278	150071133
Ebright et al. CTCs	Chr 7-region39	4	ZNF775	Chr 7	150065879	150109558
Ebright et al. CTCs	Chr 7-region39	4	GIMAP6	Chr 7	150322463	150329473
Ebright et al. CTCs	Chr 7-region39	4	GIMAP2	Chr 7	150382785	150390729
Ebright et al. CTCs	Chr 7-region39	4	TMEM176B	Chr 7	150488373	150498448
Ebright et al. CTCs	Chr 7-region39	4	TMEM176A	Chr 7	150497491	150502208
Ebright et al. CTCs	Chr 7-region39	4	KCNH2	Chr 7	150642049	150675403
Ebright et al. CTCs	Chr 7-region39	4	NOS3	Chr 7	150688083	150711676
Ebright et al. CTCs	Chr 7-region39	4	ATG9B	Chr 7	150709297	150721586
Ebright et al. CTCs	Chr 7-region39	4	ABCB8	Chr 7	150725510	150744869
Ebright et al. CTCs	Chr 7-region39	4	ASIC3	Chr 7	150745379	150749843
Ebright et al. CTCs	Chr 7-region39	4	CDK5	Chr 7	150750899	150755617
Ebright et al. CTCs	Chr 7-region39	4	SLC4A2	Chr 7	150754297	150773614
Ebright et al. CTCs	Chr 7-region39	4	FASTK	Chr 7	150773711	150777953
Ebright et al. CTCs	Chr 7-region39	4	AGAP3	Chr 7	150782918	150841523
Ebright et al. CTCs	Chr 7-region39	4	ABCF2	Chr 7	150904923	150924316
Ebright et al. CTCs	Chr 7-region39	4	NUB1	Chr 7	151038785	151075535
Ebright et al. CTCs	Chr 7-region39	4	RHEB	Chr 7	151163098	151217206
Ebright et al. CTCs	Chr 7-region39	4	PRKAG2	Chr 7	151253197	151574210
Ebright et al. CTCs	Chr 7-region39	4	GALNT11	Chr 7	151722759	151819425
Ebright et al. CTCs	Chr 7-region39	4	KMT2C	Chr 7	151832010	152133090
Ebright et al. CTCs	Chr 7-region39	4	LINC01003	Chr 7	152160871	152162634
Ebright et al. CTCs	Chr 7-region39	4	XRCC2	Chr 7	152341864	152373250
Ebright et al. CTCs	Chr 7-region39	4	ACTR3B	Chr 7	152456834	152552463
Ebright et al. CTCs	Chr 7-region39	4	AC073236.3	Chr 7	153097005	153111048
Ebright et al. CTCs	Chr 7-region39	4	AC144652.1	Chr 7	155087628	155089251
Ebright et al. CTCs	Chr 7-region39	4	INSIG1	Chr 7	155089486	155101945
Ebright et al. CTCs	Chr 7-region39	4	AC009403.2	Chr 7	155403925	155437899
Ebright et al. CTCs	Chr 7-region39	4	RBM33	Chr 7	155437145	155574179
Ebright et al. CTCs	Chr 7-region39	4	C7orf13	Chr 7	156431057	156433348
Ebright et al. CTCs	Chr 7-region39	4	LMBR1	Chr 7	156461646	156685924
Ebright et al. CTCs	Chr 7-region39	4	NOM1	Chr 7	156742417	156765876
Ebright et al. CTCs	Chr 7-region39	4	UBE3C	Chr 7	156931607	157062066
Ebright et al. CTCs	Chr 7-region39	4	DNAJB6	Chr 7	157128075	157210133
Ebright et al. CTCs	Chr 7-region39	4	PTPRN2	Chr 7	157331750	158380480
Ebright et al. CTCs	Chr 7-region39	4	ESYT2	Chr 7	158523686	158622944
Ebright et al. CTCs	Chr 7-region39	4	VIPR2	Chr 7	158820866	158937649
Ebright et al. CTCs	Chr 8-region40	4	FBXO25	Chr 8	356428	421225
Ebright et al. CTCs	Chr 8-region40	4	TDRP	Chr 8	439803	495781
Ebright et al. CTCs	Chr 8-region40	4	ERICH1	Chr 8	564746	688106
Ebright et al. CTCs	Chr 8-region40	4	CLN8	Chr 8	1703944	1734738
Ebright et al. CTCs	Chr 8-region40	4	ARHGEF10	Chr 8	1772142	1906807
Ebright et al. CTCs	Chr 8-region40	4	MCPH1	Chr 8	6264113	6501144
Ebright et al. CTCs	Chr 8-region40	4	ANGPT2	Chr 8	6357172	6420930
Ebright et al. CTCs	Chr 8-region40	4	AGPAT5	Chr 8	6565878	6617184
Ebright et al. CTCs	Chr 8-region40	4	DEFA4	Chr 8	6793344	6795860
Ebright et al. CTCs	Chr 8-region40	4	DEFA1	Chr 8	6835171	6837602
Ebright et al. CTCs	Chr 8-region40	4	DEFA1B	Chr 8	6854288	6875778
Ebright et al. CTCs	Chr 8-region40	4	DEFA3	Chr 8	6873391	6875823
Ebright et al. CTCs	Chr 8-region40	4	MFHAS1	Chr 8	8640864	8751155
Ebright et al. CTCs	Chr 8-region40	4	ERI1	Chr 8	8859657	8974256
Ebright et al. CTCs	Chr 8-region40	4	PPP1R3B	Chr 8	8993765	9009084
Ebright et al. CTCs	Chr 8-region40	4	TNKS	Chr 8	9413424	9639856
Ebright et al. CTCs	Chr 8-region40	4	MSRA	Chr 8	9911778	10286401
Ebright et al. CTCs	Chr 8-region40	4	PINX1	Chr 8	10622473	10697394
Ebright et al. CTCs	Chr 8-region40	4	MTMR9	Chr 8	11141925	11185646
Ebright et al. CTCs	Chr 8-region40	4	FDFT1	Chr 8	11653082	11696818
Ebright et al. CTCs	Chr 8-region40	4	CTSB	Chr 8	11700033	11726957
Ebright et al. CTCs	Chr 8-region40	4	FAM86B1	Chr 8	12039605	12051642
Ebright et al. CTCs	Chr 8-region40	4	LONRF1	Chr 8	12579403	12613582
Ebright et al. CTCs	Chr 8-region40	4	KIAA1456	Chr 8	12803151	12889012
Ebright et al. CTCs	Chr 8-region40	4	DLC1	Chr 8	12940870	13373167
Ebright et al. CTCs	Chr 8-region40	4	TUSC3	Chr 8	15274724	15624158
Ebright et al. CTCs	Chr 8-region40	4	ZDHHC2	Chr 8	17013538	17082308
Ebright et al. CTCs	Chr 8-region40	4	CNOT7	Chr 8	17086737	17104387
Ebright et al. CTCs	Chr 8-region40	4	VPS37A	Chr 8	17104080	17159936
Ebright et al. CTCs	Chr 8-region40	4	SLC7A2	Chr 8	17354597	17428082
Ebright et al. CTCs	Chr 8-region40	4	PDGFRL	Chr 8	17433942	17501580
Ebright et al. CTCs	Chr 8-region40	4	MTUS1	Chr 8	17501304	17658426
Ebright et al. CTCs	Chr 8-region40	4	PCM1	Chr 8	17780349	17885478
Ebright et al. CTCs	Chr 8-region40	4	ASAH1	Chr 8	17913934	17942494
Ebright et al. CTCs	Chr 8-region40	4	PSD3	Chr 8	18384811	18942240
Ebright et al. CTCs	Chr 8-region40	4	SH2D4A	Chr 8	19171128	19253729
Ebright et al. CTCs	Chr 8-region40	4	INTS10	Chr 8	19674651	19709594
Ebright et al. CTCs	Chr 8-region40	4	ATP6V1B2	Chr 8	20054878	20084330
Ebright et al. CTCs	Chr 8-region40	4	DOK2	Chr 8	21766384	21771371
Ebright et al. CTCs	Chr 8-region40	4	XPO7	Chr 8	21777180	21864096
Ebright et al. CTCs	Chr 8-region40	4	DMTN	Chr 8	21906506	21940038
Ebright et al. CTCs	Chr 8-region40	4	FAM160B2	Chr 8	21946670	21962409
Ebright et al. CTCs	Chr 8-region40	4	REEP4	Chr 8	21995533	21999464
Ebright et al. CTCs	Chr 8-region40	4	POLR3D	Chr 8	22102617	22112113
Ebright et al. CTCs	Chr 8-region40	4	PIWIL2	Chr 8	22132810	22215076
Ebright et al. CTCs	Chr 8-region40	4	SLC39A14	Chr 8	22224762	22291642
Ebright et al. CTCs	Chr 8-region40	4	PPP3CC	Chr 8	22298332	22398652
Ebright et al. CTCs	Chr 8-region40	4	SORBS3	Chr 8	22402499	22433301
Ebright et al. CTCs	Chr 8-region40	4	C8orf58	Chr 8	22457114	22461663
Ebright et al. CTCs	Chr 8-region40	4	BIN3	Chr 8	22477931	22526661
Ebright et al. CTCs	Chr 8-region40	4	TNFRSF10B	Chr 8	22877646	22926692
Ebright et al. CTCs	Chr 8-region40	4	TNFRSF10D	Chr 8	22993101	23021543
Ebright et al. CTCs	Chr 8-region40	4	R3HCC1	Chr 8	23127633	23153792
Ebright et al. CTCs	Chr 8-region40	4	ENTPD4	Chr 8	23243296	23315208
Ebright et al. CTCs	Chr 8-region40	4	SLC25A37	Chr 8	23386318	23432976
Ebright et al. CTCs	Chr 8-region40	4	FP15737	Chr 8	23430157	23432974
Ebright et al. CTCs	Chr 8-region40	4	STC1	Chr 8	23699428	23712320
Ebright et al. CTCs	Chr 8-region40	4	DOCK5	Chr 8	25042238	25275598
Ebright et al. CTCs	Chr 8-region40	4	KCTD9	Chr 8	25285366	25315992
Ebright et al. CTCs	Chr 8-region40	4	CDCA2	Chr 8	25316513	25365436
Ebright et al. CTCs	Chr 8-region40	4	EBF2	Chr 8	25699246	25902913
Ebright et al. CTCs	Chr 8-region40	4	PPP2R2A	Chr 8	26149007	26230196
Ebright et al. CTCs	Chr 8-region40	4	BNIP3L	Chr 8	26240414	26363152
Ebright et al. CTCs	Chr 8-region40	4	PNMA2	Chr 8	26362202	26371608
Ebright et al. CTCs	Chr 8-region40	4	DPYSL2	Chr 8	26371791	26515694
Ebright et al. CTCs	Chr 8-region40	4	ADRA1A	Chr 8	26605667	26724790
Ebright et al. CTCs	Chr 8-region40	4	TRIM35	Chr 8	27142404	27168836
Ebright et al. CTCs	Chr 8-region40	4	PTK2B	Chr 8	27168999	27316903
Ebright et al. CTCs	Chr 8-region40	4	Chr NA2	Chr 8	27317279	27337400
Ebright et al. CTCs	Chr 8-region40	4	EPHX2	Chr 8	27348296	27403081
Ebright et al. CTCs	Chr 8-region40	4	CLU	Chr 8	27454434	27472548
Ebright et al. CTCs	Chr 8-region40	4	SCARA3	Chr 8	27491385	27534293
Ebright et al. CTCs	Chr 8-region40	4	CCDC25	Chr 8	27590835	27630170
Ebright et al. CTCs	Chr 8-region40	4	ESCO2	Chr 8	27629466	27670157
Ebright et al. CTCs	Chr 8-region40	4	PBK	Chr 8	27667137	27695612
Ebright et al. CTCs	Chr 8-region40	4	NUGGC	Chr 8	27879481	27941388
Ebright et al. CTCs	Chr 8-region40	4	ELP3	Chr 8	27947190	28048673
Ebright et al. CTCs	Chr 8-region40	4	PNOC	Chr 8	28174503	28200872
Ebright et al. CTCs	Chr 8-region40	4	ZNF395	Chr 8	28203102	28260218
Ebright et al. CTCs	Chr 8-region40	4	FBXO16	Chr 8	28205804	28347835
Ebright et al. CTCs	Chr 8-region40	4	EXTL3	Chr 8	28457986	28613116
Ebright et al. CTCs	Chr 8-region40	4	HMBOX1	Chr 8	28747911	28922281
Ebright et al. CTCs	Chr 8-region40	4	KIF13B	Chr 8	28924796	29120641
Ebright et al. CTCs	Chr 8-region40	4	DUSP4	Chr 8	29190581	29208185
Ebright et al. CTCs	Chr 8-region40	4	AC145110.1	Chr 8	29605825	29656008
Ebright et al. CTCs	Chr 8-region40	4	TMEM66	Chr 8	29920528	29940723
Ebright et al. CTCs	Chr 8-region40	4	LEPROTL1	Chr 8	29952914	30034724
Ebright et al. CTCs	Chr 8-region40	4	DCTN6	Chr 8	30013813	30041156
Ebright et al. CTCs	Chr 8-region40	4	RBPMS	Chr 8	30241944	30429778
Ebright et al. CTCs	Chr 8-region40	4	GTF2E2	Chr 8	30435835	30515768
Ebright et al. CTCs	Chr 8-region40	4	GSR	Chr 8	30535583	30585443
Ebright et al. CTCs	Chr 8-region40	4	PPP2CB	Chr 8	30631973	30671830
Ebright et al. CTCs	Chr 8-region40	4	WRN	Chr 8	30891317	31031285
Ebright et al. CTCs	Chr 8-region40	4	TTI2	Chr 8	33330904	33371119
Ebright et al. CTCs	Chr 8-region40	4	MAK16	Chr 8	33342268	33358778
Ebright et al. CTCs	Chr 8-region40	4	ZNF703	Chr 8	37553269	37557537
Ebright et al. CTCs	Chr 8-region40	4	ERLIN2	Chr 8	37594117	37616619
Ebright et al. CTCs	Chr 8-region40	4	PROSC	Chr 8	37620111	37637283
Ebright et al. CTCs	Chr 8-region40	4	BRF2	Chr 8	37700786	37707422
Ebright et al. CTCs	Chr 8-region40	4	RAB11FIP1	Chr 8	37716136	37756985
Ebright et al. CTCs	Chr 8-region40	4	EIF4EBP1	Chr 8	37887859	37917883
Ebright et al. CTCs	Chr 8-region40	4	ASH2L	Chr 8	37962760	38001594
Ebright et al. CTCs	Chr 8-region40	4	LSM1	Chr 8	38020839	38034248
Ebright et al. CTCs	Chr 8-region40	4	BAG4	Chr 8	38034051	38070819
Ebright et al. CTCs	Chr 8-region40	4	DDHD2	Chr 8	38082736	38133076
Ebright et al. CTCs	Chr 8-region40	4	PPAPDC1B	Chr 8	38120648	38126761
Ebright et al. CTCs	Chr 8-region40	4	WHSC1L1	Chr 8	38127215	38239790
Ebright et al. CTCs	Chr 8-region40	4	LETM2	Chr 8	38243725	38267045
Ebright et al. CTCs	Chr 8-region40	4	FGFR1	Chr 8	38268656	38326352
Ebright et al. CTCs	Chr 8-region40	4	C8orf86	Chr 8	38368352	38386180
Ebright et al. CTCs	Chr 8-region40	4	TACC1	Chr 8	38585704	38710546
Ebright et al. CTCs	Chr 8-region40	4	PLEKHA2	Chr 8	38758753	38831428
Ebright et al. CTCs	Chr 8-region40	4	HTRA4	Chr 8	38831683	38846181
Ebright et al. CTCs	Chr 8-region40	4	TM2D2	Chr 8	38846327	38854343
Ebright et al. CTCs	Chr 8-region40	4	ADAM9	Chr 8	38854388	38962663
Ebright et al. CTCs	Chr 8-region40	4	ADAM32	Chr 8	38964509	39142430
Ebright et al. CTCs	Chr 8-region40	4	GOLGA7	Chr 8	41347915	41368499
Ebright et al. CTCs	Chr 8-region40	4	GINS4	Chr 8	41386725	41402565
Ebright et al. CTCs	Chr 8-region40	4	AGPAT6	Chr 8	41434706	41482520
Ebright et al. CTCs	Chr 8-region40	4	ANK1	Chr 8	41510739	41754280
Ebright et al. CTCs	Chr 8-region40	4	KAT6A	Chr 8	41786997	41909508
Ebright et al. CTCs	Chr 8-region40	4	AP3M2	Chr 8	42010464	42029191
Ebright et al. CTCs	Chr 8-region40	4	PLAT	Chr 8	42032236	42065242
Ebright et al. CTCs	Chr 8-region40	4	IKBKB	Chr 8	42128820	42189973
Ebright et al. CTCs	Chr 8-region40	4	POLB	Chr 8	42195972	42229326
Ebright et al. CTCs	Chr 8-region40	4	VDAC3	Chr 8	42249142	42263415
Ebright et al. CTCs	Chr 8-region40	4	SLC20A2	Chr 8	42273993	42397069
Ebright et al. CTCs	Chr 8-region40	4	SMIM19	Chr 8	42396298	42409603
Ebright et al. CTCs	Chr 8-region40	4	THAP1	Chr 8	42691817	42698468
Ebright et al. CTCs	Chr 8-region40	4	RNF170	Chr 8	42704780	42752433
Ebright et al. CTCs	Chr 8-region40	4	HOOK3	Chr 8	42752075	42885682
Ebright et al. CTCs	Chr 8-region40	4	FNTA	Chr 8	42889337	42940931
Ebright et al. CTCs	Chr 8-region40	4	HGSNAT	Chr 8	42995556	43057998
Ebright et al. CTCs	Chr 8-region40	4	SPIDR	Chr 8	48173167	48648868
Ebright et al. CTCs	Chr 8-region40	4	CEBPD	Chr 8	48649471	48651648
Ebright et al. CTCs	Chr 8-region40	4	PRKDC	Chr 8	48685669	48872743
Ebright et al. CTCs	Chr 8-region40	4	MCM4	Chr 8	48872745	48890720
Ebright et al. CTCs	Chr 8-region40	4	UBE2V2	Chr 8	48920960	48977268
Ebright et al. CTCs	Chr 8-region40	4	PCMTD1	Chr 8	52730140	52811735
Ebright et al. CTCs	Chr 8-region42	2	CPQ	Chr 8	97657455	98161882
Ebright et al. CTCs	Chr 8-region42	2	TSPYL5	Chr 8	98285717	98290176
Ebright et al. CTCs	Chr 8-region42	2	MTDH	Chr 8	98656407	98740998
Ebright et al. CTCs	Chr 8-region42	2	LAPTM4B	Chr 8	98787285	98865241
Ebright et al. CTCs	Chr 8-region42	2	MATN2	Chr 8	98881068	99048944
Ebright et al. CTCs	Chr 8-region42	2	RPL30	Chr 8	99037079	99058697
Ebright et al. CTCs	Chr 8-region42	2	HRSP12	Chr 8	99114572	99129469
Ebright et al. CTCs	Chr 8-region42	2	POP1	Chr 8	99129525	99172062
Ebright et al. CTCs	Chr 8-region42	2	NIPAL2	Chr 8	99202061	99306621
Ebright et al. CTCs	Chr 8-region42	2	STK3	Chr 8	99413631	99955055
Ebright et al. CTCs	Chr 8-region42	2	OSR2	Chr 8	99956631	99964332
Ebright et al. CTCs	Chr 8-region42	2	VPS13B	Chr 8	100025494	100889808
Ebright et al. CTCs	Chr 8-region42	2	COX6C	Chr 8	100885428	100906290
Ebright et al. CTCs	Chr 8-region42	2	POLR2K	Chr 8	101162812	101166230
Ebright et al. CTCs	Chr 8-region42	2	SPAG1	Chr 8	101170134	101271506
Ebright et al. CTCs	Chr 8-region42	2	RNF19A	Chr 8	101269288	101348446
Ebright et al. CTCs	Chr 8-region42	2	ANKRD46	Chr 8	101521980	101572012
Ebright et al. CTCs	Chr 8-region42	2	PABPC1	Chr 8	101698044	101735037
Ebright et al. CTCs	Chr 8-region42	2	YWHAZ	Chr 8	101928753	101965616
Ebright et al. CTCs	Chr 8-region42	2	ZNF706	Chr 8	102190106	102218421
Ebright et al. CTCs	Chr 8-region42	2	GRHL2	Chr 8	102504660	102681954
Ebright et al. CTCs	Chr 8-region42	2	NCALD	Chr 8	102698771	103137135
Ebright et al. CTCs	Chr 8-region42	2	RRM2B	Chr 8	103216730	103251346
Ebright et al. CTCs	Chr 8-region42	2	UBR5	Chr 8	103265240	103425069
Ebright et al. CTCs	Chr 8-region42	2	KLF10	Chr 8	103661007	103668130
Ebright et al. CTCs	Chr 8-region42	2	AZIN1	Chr 8	103838585	103906092
Ebright et al. CTCs	Chr 8-region42	2	ATP6V1C1	Chr 8	104033291	104085279
Ebright et al. CTCs	Chr 8-region42	2	BAALC	Chr 8	104152938	104242533
Ebright et al. CTCs	Chr 8-region42	2	SLC25A32	Chr 8	104410863	104427417
Ebright et al. CTCs	Chr 8-region42	2	DCAF13	Chr 8	104426942	104455681
Ebright et al. CTCs	Chr 8-region42	2	RIMS2	Chr 8	104512976	105268322
Ebright et al. CTCs	Chr 8-region42	2	DCSTAMP	Chr 8	105351315	105368917
Ebright et al. CTCs	Chr 8-region42	2	LRP12	Chr 8	105501459	105601252
Ebright et al. CTCs	Chr 8-region42	2	OXR1	Chr 8	107282473	107764922
Ebright et al. CTCs	Chr 8-region42	2	ANGPT1	Chr 8	108261721	108510283
Ebright et al. CTCs	Chr 8-region42	2	EIF3E	Chr 8	109213445	109447562
Ebright et al. CTCs	Chr 8-region42	2	EMC2	Chr 8	109455830	109499145
Ebright et al. CTCs	Chr 8-region42	2	NUDCD1	Chr 8	110253148	110346614
Ebright et al. CTCs	Chr 8-region42	2	ENY2	Chr 8	110346553	110358182
Ebright et al. CTCs	Chr 8-region42	2	PKHD1L1	Chr 8	110374706	110542559
Ebright et al. CTCs	Chr 8-region42	2	EBAG9	Chr 8	110551940	110578225
Ebright et al. CTCs	Chr 8-region42	2	SYBU	Chr 8	110586207	110704020
Ebright et al. CTCs	Chr 8-region42	2	CSMD3	Chr 8	113235157	114449328
Ebright et al. CTCs	Chr 8-region42	2	TRPS1	Chr 8	116420724	116821899
Ebright et al. CTCs	Chr 8-region42	2	EIF3H	Chr 8	117654369	117779164
Ebright et al. CTCs	Chr 8-region42	2	UTP23	Chr 8	117778742	117861702
Ebright et al. CTCs	Chr 8-region42	2	RAD21	Chr 8	117858174	117887105
Ebright et al. CTCs	Chr 8-region44	3	GRINA	Chr 8	145064226	145067583
Ebright et al. CTCs	Chr 8-region44	3	EXOSC4	Chr 8	145133529	145135550
Ebright et al. CTCs	Chr 8-region44	3	GPAA1	Chr 8	145137493	145141119
Ebright et al. CTCs	Chr 8-region44	3	CYC1	Chr 8	145149930	145152428
Ebright et al. CTCs	Chr 8-region44	3	SHARPIN	Chr 8	145153536	145163027
Ebright et al. CTCs	Chr 8-region44	3	MAF1	Chr 8	145159402	145162514
Ebright et al. CTCs	Chr 8-region44	3	FAM203A	Chr 8	145192672	145195746
Ebright et al. CTCs	Chr 8-region44	3	MROH1	Chr 8	145202919	145316843
Ebright et al. CTCs	Chr 8-region44	3	FAM203B	Chr 8	145437880	145440835
Ebright et al. CTCs	Chr 8-region44	3	HSF1	Chr 8	145515280	145538385
Ebright et al. CTCs	Chr 8-region44	3	DGAT1	Chr 8	145539954	145550573
Ebright et al. CTCs	Chr 8-region44	3	SLC52A2	Chr 8	145577795	145584932
Ebright et al. CTCs	Chr 8-region44	3	FBXL6	Chr 8	145579091	145583036
Ebright et al. CTCs	Chr 8-region44	3	CPSF1	Chr 8	145618444	145634753
Ebright et al. CTCs	Chr 8-region44	3	SLC39A4	Chr 8	145635126	145642279
Ebright et al. CTCs	Chr 8-region44	3	VPS28	Chr 8	145649000	145653931
Ebright et al. CTCs	Chr 8-region44	3	TONSL	Chr 8	145654165	145669827
Ebright et al. CTCs	Chr 8-region44	3	CYHR1	Chr 8	145674965	145691060
Ebright et al. CTCs	Chr 8-region44	3	KIFC2	Chr 8	145691426	145699585
Ebright et al. CTCs	Chr 8-region44	3	FOXH1	Chr 8	145698795	145701718
Ebright et al. CTCs	Chr 8-region44	3	PPP1R16A	Chr 8	145703352	145727504
Ebright et al. CTCs	Chr 8-region44	3	RECQL4	Chr 8	145736667	145743229
Ebright et al. CTCs	Chr 8-region44	3	LRRC14	Chr 8	145743376	145750557
Ebright et al. CTCs	Chr 8-region44	3	C8orf82	Chr 8	145751117	145754516
Ebright et al. CTCs	Chr 8-region44	3	ZNF251	Chr 8	145946298	145981802
Ebright et al. CTCs	Chr 8-region44	3	RPL8	Chr 8	146015150	146017972
Ebright et al. CTCs	Chr 8-region44	3	ZNF517	Chr 8	146024261	146036554
Ebright et al. CTCs	Chr 8-region44	3	ZNF7	Chr 8	146052849	146072894
Ebright et al. CTCs	Chr 8-region44	3	COMMD5	Chr 8	146066427	146079121
Ebright et al. CTCs	Chr 8-region44	3	ZNF250	Chr 8	146076632	146127553
Ebright et al. CTCs	Chr 8-region44	3	ZNF16	Chr 8	146155744	146176274
Ebright et al. CTCs	Chr 8-region44	3	C8orf33	Chr 8	146277764	146281416
Ebright et al. CTCs	Chr 9-region46	3	TRMT10B	Chr 9	37753804	37778969
Ebright et al. CTCs	Chr 9-region46	3	EXOSC3	Chr 9	37766975	37801434
Ebright et al. CTCs	Chr 9-region46	3	DCAF10	Chr 9	37800499	37867663
Ebright et al. CTCs	Chr 9-region46	3	SLC25A51	Chr 9	37879400	37904350
Ebright et al. CTCs	Chr 9-region46	3	SHB	Chr 9	37919131	38069210
Ebright et al. CTCs	Chr 9-region46	3	ALDH1B1	Chr 9	38392661	38398658
Ebright et al. CTCs	Chr 9-region46	3	CNTNAP3	Chr 9	39072764	39288312
Ebright et al. CTCs	Chr 9-region46	3	FAM74A3	Chr 9	40715662	40722679
Ebright et al. CTCs	Chr 9-region46	3	FAM74A6	Chr 9	41516046	41523018
Ebright et al. CTCs	Chr 9-region46	3	CBWD7	Chr 9	42668608	42714962
Ebright et al. CTCs	Chr 9-region46	3	CBWD6	Chr 9	69204538	69269662
Ebright et al. CTCs	Chr 9-region46	3	BX255923.1	Chr 9	69252845	69254032
Ebright et al. CTCs	Chr 9-region46	3	CBWD5	Chr 9	70432004	70497240
Ebright et al. CTCs	Chr 9-region46	3	AL591479.1	Chr 9	70646589	70648956
Ebright et al. CTCs	Chr 9-region46	3	CBWD3	Chr 9	70856397	70914929
Ebright et al. CTCs	Chr 9-region46	3	PIP5K1B	Chr 9	71320575	71624092
Ebright et al. CTCs	Chr 9-region46	3	FAM122A	Chr 9	71394964	71398609
Ebright et al. CTCs	Chr 9-region46	3	FXN	Chr 9	71650175	71715094
Ebright et al. CTCs	Chr 9-region46	3	TJP2	Chr 9	71736209	71870124
Ebright et al. CTCs	Chr 9-region46	3	AL358113.1	Chr 9	71869331	71869642
Ebright et al. CTCs	Chr 9-region46	3	PTAR1	Chr 9	72324438	72374875
Ebright et al. CTCs	Chr 9-region46	3	SMC5	Chr 9	72873937	72969804
Ebright et al. CTCs	Chr 9-region46	3	KLF9	Chr 9	72999503	73029540
Ebright et al. CTCs	Chr 9-region46	3	ABHD17B	Chr 9	74477368	74525847
Ebright et al. CTCs	Chr 9-region46	3	C9orf85	Chr 9	74526426	74600970
Ebright et al. CTCs	Chr 9-region46	3	C9orf57	Chr 9	74666292	74687733
Ebright et al. CTCs	Chr 9-region46	3	ZFAND5	Chr 9	74966341	74980163
Ebright et al. CTCs	Chr 9-region46	3	ALDH1A1	Chr 9	75515578	75695358
Ebright et al. CTCs	Chr 9-region46	3	ANXA1	Chr 9	75766673	75785309
Ebright et al. CTCs	Chr 9-region46	3	TRPM6	Chr 9	77337411	77503010
Ebright et al. CTCs	Chr 9-region46	3	C9orf40	Chr 9	77561497	77567802
Ebright et al. CTCs	Chr 9-region46	3	NMRK1	Chr 9	77675489	77703133
Ebright et al. CTCs	Chr 9-region46	3	PCSK5	Chr 9	78505560	78977255
Ebright et al. CTCs	Chr 9-region46	3	RFK	Chr 9	79000433	79009433
Ebright et al. CTCs	Chr 9-region46	3	GCNT1	Chr 9	79034752	79122332
Ebright et al. CTCs	Chr 9-region46	3	PRUNE2	Chr 9	79226292	79521003
Ebright et al. CTCs	Chr 9-region46	3	VPS13A	Chr 9	79792269	80036457
Ebright et al. CTCs	Chr 9-region46	3	GNA14	Chr 9	80037995	80263223
Ebright et al. CTCs	Chr 9-region46	3	GNAQ	Chr 9	80331003	80646374
Ebright et al. CTCs	Chr 9-region46	3	CEP78	Chr 9	80850978	80894606
Ebright et al. CTCs	Chr 9-region46	3	TLE4	Chr 9	82186688	82341658
Ebright et al. CTCs	Chr 9-region46	3	TLE1	Chr 9	84198598	84304220
Ebright et al. CTCs	Chr 9-region46	3	RASEF	Chr 9	85594500	85678092
Ebright et al. CTCs	Chr 9-region46	3	FRMD3	Chr 9	85857905	86153461
Ebright et al. CTCs	Chr 9-region46	3	UBQLN1	Chr 9	86274878	86323118
Ebright et al. CTCs	Chr 9-region46	3	GKAP1	Chr 9	86354336	86444431
Ebright et al. CTCs	Chr 9-region46	3	KIF27	Chr 9	86451613	86536342
Ebright et al. CTCs	Chr 9-region46	3	HNRNPK	Chr 9	86582998	86595569
Ebright et al. CTCs	Chr 9-region46	3	AGTPBP1	Chr 9	88161455	88356944
Ebright et al. CTCs	Chr 9-region46	3	NAA35	Chr 9	88556061	88637213
Ebright et al. CTCs	Chr 9-region46	3	GOLM1	Chr 9	88641061	88715088
Ebright et al. CTCs	Chr 9-region46	3	ISCA1	Chr 9	88879461	88897676
Ebright et al. CTCs	Chr 9-region46	3	ZCCHC6	Chr 9	88902648	88969369
Ebright et al. CTCs	Chr 9-region46	3	DAPK1	Chr 9	90112143	90323548
Ebright et al. CTCs	Chr 9-region46	3	CTSL	Chr 9	90340434	90346308
Ebright et al. CTCs	Chr 9-region46	3	CDK20	Chr 9	90581356	90589668
Ebright et al. CTCs	Chr 9-region46	3	SPIN1	Chr 9	91003334	91093609
Ebright et al. CTCs	Chr 9-region46	3	NXNL2	Chr 9	91150016	91199189
Ebright et al. CTCs	Chr 9-region46	3	S1PR3	Chr 9	91606362	91619925
Ebright et al. CTCs	Chr 9-region46	3	CKS2	Chr 9	91926113	91931618
Ebright et al. CTCs	Chr 9-region46	3	SECISBP2	Chr 9	91933421	91974557
Ebright et al. CTCs	Chr 9-region46	3	SEMA4D	Chr 9	91975702	92113045
Ebright et al. CTCs	Chr 9-region46	3	GADD45G	Chr 9	92219928	92221470
Ebright et al. CTCs	Chr 9-region46	3	SYK	Chr 9	93564069	93660831
Ebright et al. CTCs	Chr 9-region46	3	NFIL3	Chr 9	94171327	94186144
Ebright et al. CTCs	Chr 9-region46	3	SPTLC1	Chr 9	94794281	94877666
Ebright et al. CTCs	Chr 9-region46	3	IARS	Chr 9	94972489	95056038
Ebright et al. CTCs	Chr 9-region46	3	NOL8	Chr 9	95059640	95087918
Ebright et al. CTCs	Chr 9-region46	3	CENPP	Chr 9	95087766	95382815
Ebright et al. CTCs	Chr 9-region46	3	OMD	Chr 9	95176527	95186743
Ebright et al. CTCs	Chr 9-region46	3	IPPK	Chr 9	95375466	95432547
Ebright et al. CTCs	Chr 9-region46	3	BICD2	Chr 9	95473645	95527094
Ebright et al. CTCs	Chr 9-region46	3	FGD3	Chr 9	95709733	95798518
Ebright et al. CTCs	Chr 9-region46	3	SUSD3	Chr 9	95820989	95847420
Ebright et al. CTCs	Chr 9-region46	3	C9orf89	Chr 9	95858500	95875565
Ebright et al. CTCs	Chr 9-region46	3	NINJ1	Chr 9	95883771	95896570
Ebright et al. CTCs	Chr 9-region46	3	WNK2	Chr 9	95947198	96082854
Ebright et al. CTCs	Chr 9-region46	3	FAM120AOS	Chr 9	96208776	96215874
Ebright et al. CTCs	Chr 9-region46	3	FAM120A	Chr 9	96214004	96328397
Ebright et al. CTCs	Chr 9-region46	3	PTPDC1	Chr 9	96793076	96872138
Ebright et al. CTCs	Chr 9-region46	3	ZNF169	Chr 9	97021593	97063736
Ebright et al. CTCs	Chr 9-region46	3	HIATL1	Chr 9	97136833	97223324
Ebright et al. CTCs	Chr 9-region46	3	PCAT7	Chr 9	97317351	97330409
Ebright et al. CTCs	Chr 9-region46	3	FBP1	Chr 9	97365415	97402531
Ebright et al. CTCs	Chr 9-region46	3	C9orf3	Chr 9	97488983	97849441
Ebright et al. CTCs	Chr 9-region46	3	FANCC	Chr 9	97861336	98079991
Ebright et al. CTCs	Chr 9-region46	3	LINC00092	Chr 9	98782014	98790247
Ebright et al. CTCs	Chr 9-region46	3	HSD17B3	Chr 9	98997588	99064434
Ebright et al. CTCs	Chr 9-region46	3	SLC35D2	Chr 9	99082988	99145992
Ebright et al. CTCs	Chr 9-region46	3	ZNF367	Chr 9	99148223	99180611
Ebright et al. CTCs	Chr 9-region46	3	HABP4	Chr 9	99212483	99253618
Ebright et al. CTCs	Chr 9-region46	3	CDC14B	Chr 9	99252523	99382112
Ebright et al. CTCs	Chr 9-region46	3	AAED1	Chr 9	99401859	99417585
Ebright et al. CTCs	Chr 9-region46	3	ZNF782	Chr 9	99578754	99637905
Ebright et al. CTCs	Chr 9-region46	3	CCDC180	Chr 9	100000765	100140806
Ebright et al. CTCs	Chr 9-region46	3	TDRD7	Chr 9	100174232	100258407
Ebright et al. CTCs	Chr 9-region46	3	TMOD1	Chr 9	100263462	100364030
Ebright et al. CTCs	Chr 9-region46	3	TSTD2	Chr 9	100362362	100395962
Ebright et al. CTCs	Chr 9-region46	3	NCBP1	Chr 9	100395908	100436030
Ebright et al. CTCs	Chr 9-region46	3	HEMGN	Chr 9	100689073	100707138
Ebright et al. CTCs	Chr 11-region51	2	LINC01001	Chr 11	127115	139612
Ebright et al. CTCs	Chr 11-region51	2	BET1L	Chr 11	167784	207428
Ebright et al. CTCs	Chr 11-region51	2	SCGB1C1	Chr 11	193080	194573
Ebright et al. CTCs	Chr 11-region51	2	RIC8A	Chr 11	207511	215113
Ebright et al. CTCs	Chr 11-region51	2	SIRT3	Chr 11	215458	236931
Ebright et al. CTCs	Chr 11-region51	2	PSMD13	Chr 11	236546	252983
Ebright et al. CTCs	Chr 11-region51	2	ATHL1	Chr 11	289135	296107
Ebright et al. CTCs	Chr 11-region51	2	IFITM2	Chr 11	307631	315272
Ebright et al. CTCs	Chr 11-region51	2	IFITM1	Chr 11	313506	315272
Ebright et al. CTCs	Chr 11-region51	2	IFITM3	Chr 11	319669	327537
Ebright et al. CTCs	Chr 11-region51	2	SIGIRR	Chr 11	405716	417455
Ebright et al. CTCs	Chr 11-region51	2	ANO9	Chr 11	417933	442011
Ebright et al. CTCs	Chr 11-region51	2	PTDSS2	Chr 11	448268	491393
Ebright et al. CTCs	Chr 11-region51	2	RNH1	Chr 11	494512	507300
Ebright et al. CTCs	Chr 11-region51	2	HRAS	Chr 11	532242	537287
Ebright et al. CTCs	Chr 11-region51	2	RASSF7	Chr 11	560404	564021
Ebright et al. CTCs	Chr 11-region51	2	IRF7	Chr 11	612553	615999
Ebright et al. CTCs	Chr 11-region51	2	DEAF1	Chr 11	644233	706715
Ebright et al. CTCs	Chr 11-region51	2	EPS8L2	Chr 11	694438	727727
Ebright et al. CTCs	Chr 11-region51	2	TMEM80	Chr 11	695428	705028
Ebright et al. CTCs	Chr 11-region51	2	TALDO1	Chr 11	747329	765024
Ebright et al. CTCs	Chr 11-region51	2	PDDC1	Chr 11	767220	777488
Ebright et al. CTCs	Chr 11-region51	2	SLC25A22	Chr 11	790475	798316
Ebright et al. CTCs	Chr 11-region51	2	PIDD	Chr 11	799179	809753
Ebright et al. CTCs	Chr 11-region53	4	NUP98	Chr 11	3692313	3819022
Ebright et al. CTCs	Chr 11-region53	4	PGAP2	Chr 11	3818954	3847601
Ebright et al. CTCs	Chr 11-region53	4	RHOG	Chr 11	3848208	3862213
Ebright et al. CTCs	Chr 11-region53	4	STIM1	Chr 11	3875757	4114439
Ebright et al. CTCs	Chr 11-region53	4	RRM1	Chr 11	4115937	4160106
Ebright et al. CTCs	Chr 11-region53	4	TRIM68	Chr 11	4619902	4629489
Ebright et al. CTCs	Chr 11-region53	4	HBB	Chr 11	5246694	5250625
Ebright et al. CTCs	Chr 11-region53	4	HBD	Chr 11	5253908	5256600
Ebright et al. CTCs	Chr 11-region53	4	HBG1	Chr 11	5269313	5271122
Ebright et al. CTCs	Chr 11-region53	4	HBG2	Chr 11	5274420	5667019
Ebright et al. CTCs	Chr 11-region53	4	AC015691.13	Chr 11	5593552	5646126
Ebright et al. CTCs	Chr 11-region53	4	TRIM5	Chr 11	5684425	5959849
Ebright et al. CTCs	Chr 11-region53	4	TRIM22	Chr 11	5710919	5758319
Ebright et al. CTCs	Chr 11-region53	4	FAM160A2	Chr 11	6232565	6255941
Ebright et al. CTCs	Chr 11-region53	4	CNGA4	Chr 11	6255995	6265659
Ebright et al. CTCs	Chr 11-region53	4	SMPD1	Chr 11	6411655	6416228
Ebright et al. CTCs	Chr 11-region53	4	HPX	Chr 11	6452279	6463847
Ebright et al. CTCs	Chr 11-region53	4	TRIM3	Chr 11	6469843	6495689
Ebright et al. CTCs	Chr 11-region53	4	ARFIP2	Chr 11	6496910	6502666
Ebright et al. CTCs	Chr 11-region53	4	TIMM10B	Chr 11	6502677	6505909
Ebright et al. CTCs	Chr 11-region53	4	DNHD1	Chr 11	6518490	6614988
Ebright et al. CTCs	Chr 11-region53	4	RRP8	Chr 11	6616305	6624850
Ebright et al. CTCs	Chr 11-region53	4	ILK	Chr 11	6624961	6632102
Ebright et al. CTCs	Chr 11-region53	4	TAF10	Chr 11	6627526	6633898
Ebright et al. CTCs	Chr 11-region53	4	TPP1	Chr 11	6634000	6640692
Ebright et al. CTCs	Chr 11-region53	4	MRPL17	Chr 11	6702013	6704632
Ebright et al. CTCs	Chr 11-region53	4	ZNF215	Chr 11	6947635	7005863
Ebright et al. CTCs	Chr 11-region53	4	SYT9	Chr 11	7260009	7490273
Ebright et al. CTCs	Chr 11-region53	4	PPFIBP2	Chr 11	7534529	7678358
Ebright et al. CTCs	Chr 11-region53	4	EIF3F	Chr 11	7991798	8023409
Ebright et al. CTCs	Chr 11-region53	4	TUB	Chr 11	8040791	8127659
Ebright et al. CTCs	Chr 11-region53	4	RIC3	Chr 11	8127597	8190602
Ebright et al. CTCs	Chr 11-region53	4	STK33	Chr 11	8413418	8615836
Ebright et al. CTCs	Chr 11-region53	4	TRIM66	Chr 11	8633584	8693413
Ebright et al. CTCs	Chr 11-region53	4	RPL27A	Chr 11	8703958	8736306
Ebright et al. CTCs	Chr 11-region53	4	AKIP1	Chr 11	8932686	8941631
Ebright et al. CTCs	Chr 11-region53	4	TMEM9B	Chr 11	8968841	8986558
Ebright et al. CTCs	Chr 11-region55	2	SERPING1	Chr 11	57364860	57382326
Ebright et al. CTCs	Chr 11-region55	2	YPEL4	Chr 11	57412560	57417417
Ebright et al. CTCs	Chr 11-region55	2	CLP1	Chr 11	57416465	57429340
Ebright et al. CTCs	Chr 11-region55	2	ZDHHC5	Chr 11	57435219	57468659
Ebright et al. CTCs	Chr 11-region55	2	MED19	Chr 11	57471186	57479693
Ebright et al. CTCs	Chr 11-region55	2	TMX2	Chr 11	57480072	57508445
Ebright et al. CTCs	Chr 11-region55	2	C11orf31	Chr 11	57508825	57510986
Ebright et al. CTCs	Chr 11-region55	2	CTNND1	Chr 11	57520715	57587018
Ebright et al. CTCs	Chr 11-region55	2	LPXN	Chr 11	58294344	58345693
Ebright et al. CTCs	Chr 11-region55	2	ZFP91	Chr 11	58346584	58388515
Ebright et al. CTCs	Chr 11-region55	2	GLYATL2	Chr 11	58601542	58671688
Ebright et al. CTCs	Chr 11-region55	2	FAM111B	Chr 11	58874658	58894883
Ebright et al. CTCs	Chr 11-region55	2	AP001258.4	Chr 11	58897606	58910488
Ebright et al. CTCs	Chr 11-region55	2	FAM111A	Chr 11	58910221	58922512
Ebright et al. CTCs	Chr 11-region55	2	OSBP	Chr 11	59341871	59383617
Ebright et al. CTCs	Chr 11-region55	2	PATL1	Chr 11	59404189	59436453
Ebright et al. CTCs	Chr 11-region55	2	STX3	Chr 11	59480929	59573354
Ebright et al. CTCs	Chr 11-region55	2	MRPL16	Chr 11	59573608	59578345
Ebright et al. CTCs	Chr 11-region55	2	TCN1	Chr 11	59620273	59634048
Ebright et al. CTCs	Chr 11-region55	2	MS4A3	Chr 11	59824060	59838601
Ebright et al. CTCs	Chr 11-region55	2	MS4A7	Chr 11	60145955	60163424
Ebright et al. CTCs	Chr 11-region55	2	MS4A10	Chr 11	60552821	60568778
Ebright et al. CTCs	Chr 11-region55	2	CCDC86	Chr 11	60609544	60618554
Ebright et al. CTCs	Chr 11-region55	2	PRPF19	Chr 11	60658202	60674060
Ebright et al. CTCs	Chr 11-region55	2	TMEM109	Chr 11	60681346	60690915
Ebright et al. CTCs	Chr 11-region55	2	TMEM132A	Chr 11	60691935	60704631
Ebright et al. CTCs	Chr 11-region55	2	SLC15A3	Chr 11	60704556	60720002
Ebright et al. CTCs	Chr 11-region55	2	CD6	Chr 11	60739115	60787849
[truncated: 2,091 more rows]
