# Supplementary material for: Marker-free characterization of full-length transcriptomes of single live circulating tumor cells
Source: HighWire-hosted journal article supplement (doi:10.1101/gr.276600.122), 2022-11-22
Supplement: Supplemental_Table_S10.docx [file Supplemental_Table_S10.docx]

**Supplementary Table S10 :** Figures and notes corresponding to various comparative analyses.

| **Study Supplementary Table S3)** | **Seurat (Supplemental note S1)** | | **fastMNN** | **Harmony (Supplemental note S1)** | **unCTC (Supplemental note S1)** |
| --- | --- | --- | --- | --- | --- |
| **Vanila Seurat** | **Integrative Seurat** |
| **Study #1 (Count)** | Clusters shown in the UMAP embedding space – Figure 3 (A-C) | canonical correlation analysis (cca) – Supplemental Figure S8 (A-C). Clusters are shown in the UMAP space. | Clusters shown in the UMAP embedding space – Figure 3 (D-F) | Clusters shown in the UMAP embedding space – Figure 3 (G-I) | Clusters shown in the UMAP embedding space – Figure 3 (J-L) |
| Clusters shown in the PCA embedding space – Supplemental Figure S1 (A-C) | reciprocal PCA (RPCA) – Supplemental Figure S9 (A-C). Clusters are shown in the UMAP space. | Clusters shown in the mnn embedding space – Supplemental Figure S1 (B, F) | Clusters shown in the Harmony embedding space – Supplemental Figure S1 (C, G) | Clusters shown in the PCA embedding space - Supplemental Figure S1 (D, H) |
| **Study #2 (TPM)** | Clusters shown in the UMAP embedding space – Figure 5 (A-C) | canonical correlation analysis (cca) – Supplemental Figure S8 (D-F). Clusters are shown in the UMAP space. | Clusters shown in the UMAP embedding space – Figure 5 (D-F) | Clusters shown in the UMAP embedding space – Figure 5 (G-I) | Clusters shown in the UMAP embedding space – Figure 5 (J-L) |
| Clusters shown in the PCA embedding space - Supplemental Figure S2 (A-C) | reciprocal PCA (RPCA) – Supplemental Figure S9 (D-F). Clusters are shown in the UMAP space. | Clusters shown in the mnn embedding space - Supplemental Figure S2 (B, F) | Clusters shown in the Harmony embedding space – Supplemental Figure S2 (C, G) | Clusters shown in the PCA embedding space – Supplemental Figure S2 (D, H) |
| **Study #2 (Count)** | Clusters shown in the UMAP embedding space – Supplemental Figure S10 (A-C) | NA | Clusters shown in the UMAP embedding space – Supplemental Figure 10 (D-F) | Clusters shown in the UMAP embedding space – Supplemental Figure S10 (G-I) | Clusters shown in the UMAP embedding space – Supplemental Figure S10 (J-L) |
| Clusters shown in the PCA embedding space – Supplemental Figure S11 (A-C) | NA | Clusters shown in the mnn embedding space– Supplemental Figure S11 (B, F) | Clusters shown in the Harmony embedding space – Supplemental Figure S11 (C, G) | Clusters shown in the PCA embedding space – Supplemental Figure S11 (D, H) |
